# Supplementary material for: Comprehensive assessment of meteorological conditions and airflow connectivity during HCCT-2010
Source: Copernicus journal article supplement (doi:10.5194/acp-14-9105-2014), 2014-09-05
Supplement: Supplementary file 1 [file ESM_HCCTevents_Mastertable_final.xlsx]

## Sheet: Mastertable
MESZ	MESZ	MESZ	MESZ	Event		Offline sampling	LWC	wind direction (dd)	COD			COD			COD			precipitation (RR)				wind speed ff (m/s)
JD_start	JD-ende	Start	Stop				SM	dd SM	COD O3 GL/SM	COD O3 SM/GE	COD O3 GL/GE	COD GL/SM_49nm	COD SM/GE_49nm	COD GL/GE_49nm	COD GL/SM_N217	COD SM/GE_N217	COD GL/GE_N217	RR (GL)	RR (SM)	RR (GB)	RR?	ff SM
252.993	253	2010-09-10 23:50:00	2010-09-11		1		-999					-999	-999	-999	-999	-999	-999
253	253.007	2010-09-11	2010-09-11 00:09:59		1		-999					-999	-999	-999	-999	-999	-999
253.007	253.014	2010-09-11 00:09:59	2010-09-11 00:20:00		1		-999					-999	-999	-999	-999	-999	-999
253.014	253.021	2010-09-11 00:20:00	2010-09-11 00:29:59		1		-999					-999	-999	-999	-999	-999	-999
253.021	253.028	2010-09-11 00:29:59	2010-09-11 00:40:00		1		-999					-999	-999	-999	-999	-999	-999
253.028	253.035	2010-09-11 00:40:00	2010-09-11 00:49:59		1		-999					-999	-999	-999	-999	-999	-999
253.035	253.042	2010-09-11 00:49:59	2010-09-11 01:00:00		1		-999	-999	-999	-999	-999	-999	-999	-999	-999	-999	-999	-999	-999	-999	0	-999
253.042	253.049	2010-09-11 01:00:00	2010-09-11 01:09:59		1		-999	-999	-999	-999	-999	-999	-999	-999	-999	-999	-999	-999	-999	-999	0	-999
253.049	253.056	2010-09-11 01:09:59	2010-09-11 01:20:00		1		-999	-999	-999	-999	-999	-999	-999	-999	-999	-999	-999	-999	-999	-999	0	-999
253.056	253.062	2010-09-11 01:20:00	2010-09-11 01:30:00		-999		-999	-999	-999	-999	-999	-999	-999	-999	-999	-999	-999	-999	-999	-999	0	-999
253.062	253.069	2010-09-11 01:30:00	2010-09-11 01:39:59		-999		-999	-999	-999	-999	-999	-999	-999	-999	-999	-999	-999	-999	-999	-999	0	-999
253.069	253.076	2010-09-11 01:39:59	2010-09-11 01:50:00		-999		-999	-999	-999	-999	-999	-999	-999	-999	-999	-999	-999	-999	-999	-999	0	-999
253.076	253.083	2010-09-11 01:50:00	2010-09-11 01:59:59		-999		-999	-999	-999	-999	-999	-999	-999	-999	-999	-999	-999	-999	-999	-999	0	-999
253.083	253.09	2010-09-11 01:59:59	2010-09-11 02:10:00		-999		-999	-999	-999	-999	-999	-999	-999	-999	-999	-999	-999	-999	-999	-999	0	-999
253.09	253.097	2010-09-11 02:10:00	2010-09-11 02:19:59		-999		-999	-999	-999	-999	-999	-999	-999	-999	-999	-999	-999	-999	-999	-999	0	-999
253.097	253.104	2010-09-11 02:19:59	2010-09-11 02:30:00		-999		-999	-999	-999	-999	-999	-999	-999	-999	-999	-999	-999	-999	-999	-999	0	-999
253.104	253.111	2010-09-11 02:30:00	2010-09-11 02:39:59		-999		-999	-999	-999	-999	-999	-999	-999	-999	-999	-999	-999	-999	-999	-999	0	-999
253.111	253.118	2010-09-11 02:39:59	2010-09-11 02:50:00		-999		-999	-999	-999	-999	-999	-999	-999	-999	-999	-999	-999	-999	-999	-999	0	-999
253.118	253.125	2010-09-11 02:50:00	2010-09-11 03:00:00		-999		-999	-999	-999	-999	-999	-999	-999	-999	-999	-999	-999	-999	-999	-999	0	-999
253.125	253.132	2010-09-11 03:00:00	2010-09-11 03:09:59		-999		-999	-999	-999	-999	-999	-999	-999	-999	-999	-999	-999	-999	-999	-999	0	-999
253.132	253.139	2010-09-11 03:09:59	2010-09-11 03:20:00		-999		-999	-999	-999	-999	-999	-999	-999	-999	-999	-999	-999	-999	-999	-999	0	-999
253.139	253.146	2010-09-11 03:20:00	2010-09-11 03:29:59		-999		-999	-999	-999	-999	-999	-999	-999	-999	-999	-999	-999	-999	-999	-999	0	-999
253.146	253.153	2010-09-11 03:29:59	2010-09-11 03:40:00		-999		-999	-999	-999	-999	-999	-999	-999	-999	-999	-999	-999	-999	-999	-999	0	-999
253.153	253.16	2010-09-11 03:40:00	2010-09-11 03:49:59		-999		-999	-999	-999	-999	-999	-999	-999	-999	-999	-999	-999	-999	-999	-999	0	-999
253.16	253.167	2010-09-11 03:49:59	2010-09-11 04:00:00		-999		-999	-999	-999	-999	-999	-999	-999	-999	-999	-999	-999	-999	-999	-999	0	-999
253.167	253.174	2010-09-11 04:00:00	2010-09-11 04:09:59		-999		-999	-999	-999	-999	-999	-999	-999	-999	-999	-999	-999	-999	-999	-999	0	-999
253.174	253.181	2010-09-11 04:09:59	2010-09-11 04:20:00		-999		-999	-999	-999	-999	-999	-999	-999	-999	-999	-999	-999	-999	-999	-999	0	-999
253.181	253.188	2010-09-11 04:20:00	2010-09-11 04:30:00		-999		-999	-999	-999	-999	-999	-999	-999	-999	-999	-999	-999	-999	-999	-999	0	-999
253.188	253.194	2010-09-11 04:30:00	2010-09-11 04:39:59		-999		-999	-999	-999	-999	-999	-999	-999	-999	-999	-999	-999	-999	-999	-999	0	-999
253.194	253.201	2010-09-11 04:39:59	2010-09-11 04:50:00		-999		-999	-999	-999	-999	-999	-999	-999	-999	-999	-999	-999	-999	-999	-999	0	-999
253.201	253.208	2010-09-11 04:50:00	2010-09-11 04:59:59		-999		-999	-999	-999	-999	-999	-999	-999	-999	-999	-999	-999	-999	-999	-999	0	-999
253.208	253.215	2010-09-11 04:59:59	2010-09-11 05:10:00		-999		-999	-999	-999	-999	-999	-999	-999	-999	-999	-999	-999	-999	-999	-999	0	-999
253.215	253.222	2010-09-11 05:10:00	2010-09-11 05:19:59		-999		-999	-999	-999	-999	-999	-999	-999	-999	-999	-999	-999	-999	-999	-999	0	-999
253.222	253.229	2010-09-11 05:19:59	2010-09-11 05:30:00		-999		-999	-999	-999	-999	-999	-999	-999	-999	-999	-999	-999	-999	-999	-999	0	-999
253.229	253.236	2010-09-11 05:30:00	2010-09-11 05:39:59		-999		-999	-999	-999	-999	-999	-999	-999	-999	-999	-999	-999	-999	-999	-999	0	-999
253.236	253.243	2010-09-11 05:39:59	2010-09-11 05:50:00		-999		-999	-999	-999	-999	-999	-999	-999	-999	-999	-999	-999	-999	-999	-999	0	-999
253.243	253.25	2010-09-11 05:50:00	2010-09-11 06:00:00		-999		-999	-999	-999	-999	-999	-999	-999	-999	-999	-999	-999	-999	-999	-999	0	-999
253.25	253.257	2010-09-11 06:00:00	2010-09-11 06:09:59		-999		-999	-999	-999	-999	-999	-999	-999	-999	-999	-999	-999	-999	-999	-999	0	-999
253.257	253.264	2010-09-11 06:09:59	2010-09-11 06:20:00		-999		-999	-999	-999	-999	-999	-999	-999	-999	-999	-999	-999	-999	-999	-999	0	-999
253.264	253.271	2010-09-11 06:20:00	2010-09-11 06:29:59		-999		-999	-999	-999	-999	-999	-999	-999	-999	-999	-999	-999	-999	-999	-999	0	-999
253.271	253.278	2010-09-11 06:29:59	2010-09-11 06:40:00		-999		-999	-999	-999	-999	-999	-999	-999	-999	-999	-999	-999	-999	-999	-999	0	-999
253.278	253.285	2010-09-11 06:40:00	2010-09-11 06:49:59		-999		-999	-999	-999	-999	-999	-999	-999	-999	-999	-999	-999	-999	-999	-999	0	-999
253.285	253.292	2010-09-11 06:49:59	2010-09-11 07:00:00		-999		-999	-999	-999	-999	-999	-999	-999	-999	-999	-999	-999	-999	-999	-999	0	-999
253.292	253.299	2010-09-11 07:00:00	2010-09-11 07:09:59		-999		-999	-999	-999	-999	-999	-999	-999	-999	-999	-999	-999	-999	-999	-999	0	-999
253.299	253.306	2010-09-11 07:09:59	2010-09-11 07:20:00		-999		-999	-999	-999	-999	-999	-999	-999	-999	-999	-999	-999	-999	-999	-999	0	-999
253.306	253.312	2010-09-11 07:20:00	2010-09-11 07:30:00		-999		-999	-999	-999	-999	-999	-999	-999	-999	-999	-999	-999	-999	-999	-999	0	-999
253.312	253.319	2010-09-11 07:30:00	2010-09-11 07:39:59		-999		-999	-999	-999	-999	-999	-999	-999	-999	-999	-999	-999	-999	-999	-999	0	-999
253.319	253.326	2010-09-11 07:39:59	2010-09-11 07:50:00		-999		-999	-999	-999	-999	-999	-999	-999	-999	-999	-999	-999	-999	-999	-999	0	-999
253.326	253.333	2010-09-11 07:50:00	2010-09-11 07:59:59		-999		-999	-999	-999	-999	-999	-999	-999	-999	-999	-999	-999	-999	-999	-999	0	-999
253.333	253.34	2010-09-11 07:59:59	2010-09-11 08:10:00		-999		-999	-999	-999	-999	-999	-999	-999	-999	-999	-999	-999	-999	-999	-999	0	-999
253.34	253.347	2010-09-11 08:10:00	2010-09-11 08:19:59		-999		-999	-999	-999	-999	-999	-999	-999	-999	-999	-999	-999	-999	-999	-999	0	-999
253.347	253.354	2010-09-11 08:19:59	2010-09-11 08:30:00		-999		-999	-999	-999	-999	-999	-999	-999	-999	-999	-999	-999	-999	-999	-999	0	-999
253.354	253.361	2010-09-11 08:30:00	2010-09-11 08:39:59		-999		-999	-999	-999	-999	-999	-999	-999	-999	-999	-999	-999	-999	-999	-999	0	-999
253.361	253.368	2010-09-11 08:39:59	2010-09-11 08:50:00		-999		-999	-999	-999	-999	-999	-999	-999	-999	-999	-999	-999	-999	-999	-999	0	-999
253.368	253.375	2010-09-11 08:50:00	2010-09-11 09:00:00		-999		-999	-999	-999	-999	-999	-999	-999	-999	-999	-999	-999	-999	-999	-999	0	-999
253.375	253.382	2010-09-11 09:00:00	2010-09-11 09:09:59		-999		-999	-999	-999	-999	-999	-999	-999	-999	-999	-999	-999	-999	-999	-999	0	-999
253.382	253.389	2010-09-11 09:09:59	2010-09-11 09:20:00		-999		-999	-999	-999	-999	-999	-999	-999	-999	-999	-999	-999	-999	-999	-999	0	-999
253.389	253.396	2010-09-11 09:20:00	2010-09-11 09:29:59		-999		-999	-999	-999	-999	-999	-999	-999	-999	-999	-999	-999	-999	-999	-999	0	-999
253.396	253.403	2010-09-11 09:29:59	2010-09-11 09:40:00		-999		-999	-999	-999	-999	-999	-999	-999	-999	-999	-999	-999	-999	-999	-999	0	-999
253.403	253.41	2010-09-11 09:40:00	2010-09-11 09:49:59		-999		-999	-999	-999	-999	-999	-999	-999	-999	-999	-999	-999	-999	-999	-999	0	-999
253.41	253.417	2010-09-11 09:49:59	2010-09-11 10:00:00		-999		-999	-999	-999	-999	-999	-999	-999	-999	-999	-999	-999	-999	-999	-999	0	-999
253.417	253.424	2010-09-11 10:00:00	2010-09-11 10:09:59		-999		-999	-999	-999	-999	-999	-999	-999	-999	-999	-999	-999	-999	-999	-999	0	-999
253.424	253.431	2010-09-11 10:09:59	2010-09-11 10:20:00		-999		-999	-999	-999	-999	-999	-999	-999	-999	-999	-999	-999	-999	-999	-999	0	-999
253.431	253.438	2010-09-11 10:20:00	2010-09-11 10:30:00		-999		-999	-999	-999	-999	-999	-999	-999	-999	-999	-999	-999	-999	-999	-999	0	-999
253.438	253.444	2010-09-11 10:30:00	2010-09-11 10:39:59		-999		-999	-999	-999	-999	-999	-999	-999	-999	-999	-999	-999	-999	-999	-999	0	-999
253.444	253.451	2010-09-11 10:39:59	2010-09-11 10:50:00		-999		-999	-999	-999	-999	-999	-999	-999	-999	-999	-999	-999	-999	-999	-999	0	-999
253.451	253.458	2010-09-11 10:50:00	2010-09-11 10:59:59		-999		-999	-999	-999	-999	-999	-999	-999	-999	-999	-999	-999	-999	-999	-999	0	-999
253.458	253.465	2010-09-11 10:59:59	2010-09-11 11:10:00		-999		-999	-999	-999	-999	-999	-999	-999	-999	-999	-999	-999	-999	-999	-999	0	-999
253.465	253.472	2010-09-11 11:10:00	2010-09-11 11:19:59		-999		-999	-999	-999	-999	-999	-999	-999	-999	-999	-999	-999	-999	-999	-999	0	-999
253.472	253.479	2010-09-11 11:19:59	2010-09-11 11:30:00		-999		-999	-999	-999	-999	-999	-999	-999	-999	-999	-999	-999	-999	-999	-999	0	-999
253.479	253.486	2010-09-11 11:30:00	2010-09-11 11:39:59		-999		-999	-999	-999	-999	-999	-999	-999	-999	-999	-999	-999	-999	-999	-999	0	-999
253.486	253.493	2010-09-11 11:39:59	2010-09-11 11:50:00		-999		-999	-999	-999	-999	-999	-999	-999	-999	-999	-999	-999	-999	-999	-999	0	-999
253.493	253.5	2010-09-11 11:50:00	2010-09-11 12:00:00		-999		-999	-999	-999	-999	-999	-999	-999	-999	-999	-999	-999	-999	-999	-999	0	-999
253.5	253.507	2010-09-11 12:00:00	2010-09-11 12:09:59		-999		-999	-999	-999	-999	-999	-999	-999	-999	-999	-999	-999	-999	-999	-999	0	-999
253.507	253.514	2010-09-11 12:09:59	2010-09-11 12:20:00		-999		-999	-999	-999	-999	-999	-999	-999	-999	-999	-999	-999	-999	-999	-999	0	-999
253.514	253.521	2010-09-11 12:20:00	2010-09-11 12:29:59		-999		-999	-999	-999	-999	-999	-999	-999	-999	-999	-999	-999	-999	-999	-999	0	-999
253.521	253.528	2010-09-11 12:29:59	2010-09-11 12:40:00		-999		-999	-999	-999	-999	-999	-999	-999	-999	-999	-999	-999	-999	-999	-999	0	-999
253.528	253.535	2010-09-11 12:40:00	2010-09-11 12:49:59		-999		-999	-999	-999	-999	-999	-999	-999	-999	-999	-999	-999	-999	-999	-999	0	-999
253.535	253.542	2010-09-11 12:49:59	2010-09-11 13:00:00		-999		-999	-999	-999	-999	-999	-999	-999	-999	-999	-999	-999	-999	-999	-999	0	-999
253.542	253.549	2010-09-11 13:00:00	2010-09-11 13:09:59		-999		-999	-999	-999	-999	-999	-999	-999	-999	-999	-999	-999	-999	-999	-999	0	-999
253.549	253.556	2010-09-11 13:09:59	2010-09-11 13:20:00		-999		-999	-999	-999	-999	-999	-999	-999	-999	-999	-999	-999	-999	-999	-999	0	-999
253.556	253.562	2010-09-11 13:20:00	2010-09-11 13:30:00		-999		-999	-999	-999	-999	-999	-999	-999	-999	-999	-999	-999	-999	-999	-999	0	-999
253.562	253.569	2010-09-11 13:30:00	2010-09-11 13:39:59		-999		-999	-999	-999	-999	-999	-999	-999	-999	-999	-999	-999	-999	-999	-999	0	-999
253.569	253.576	2010-09-11 13:39:59	2010-09-11 13:50:00		-999		-999	-999	-999	-999	-999	-999	-999	-999	-999	-999	-999	-999	-999	-999	0	-999
253.576	253.583	2010-09-11 13:50:00	2010-09-11 13:59:59		-999		-999	-999	-999	-999	-999	-999	-999	-999	-999	-999	-999	-999	-999	-999	0	-999
253.583	253.59	2010-09-11 13:59:59	2010-09-11 14:10:00		-999		-999	-999	-999	-999	-999	-999	-999	-999	-999	-999	-999	-999	-999	-999	0	-999
253.59	253.597	2010-09-11 14:10:00	2010-09-11 14:19:59		-999		-999	-999	-999	-999	-999	-999	-999	-999	-999	-999	-999	-999	-999	-999	0	-999
253.597	253.604	2010-09-11 14:19:59	2010-09-11 14:30:00		-999		-999	-999	-999	-999	-999	-999	-999	-999	-999	-999	-999	-999	-999	-999	0	-999
253.604	253.611	2010-09-11 14:30:00	2010-09-11 14:39:59		-999		-999	-999	-999	-999	-999	-999	-999	-999	-999	-999	-999	-999	-999	-999	0	-999
253.611	253.618	2010-09-11 14:39:59	2010-09-11 14:50:00		-999		-999	-999	-999	-999	-999	-999	-999	-999	-999	-999	-999	-999	-999	-999	0	-999
253.618	253.625	2010-09-11 14:50:00	2010-09-11 15:00:00		-999		-999	-999	-999	-999	-999	-999	-999	-999	-999	-999	-999	-999	-999	-999	0	-999
253.625	253.632	2010-09-11 15:00:00	2010-09-11 15:09:59		-999		-999	-999	-999	-999	-999	-999	-999	-999	-999	-999	-999	-999	-999	-999	0	-999
253.632	253.639	2010-09-11 15:09:59	2010-09-11 15:20:00		-999		-999	-999	-999	-999	-999	-999	-999	-999	-999	-999	-999	-999	-999	-999	0	-999
253.639	253.646	2010-09-11 15:20:00	2010-09-11 15:29:59		-999		-999	-999	-999	-999	-999	-999	-999	-999	-999	-999	-999	-999	-999	-999	0	-999
253.646	253.653	2010-09-11 15:29:59	2010-09-11 15:40:00		-999		-999	-999	-999	-999	-999	-999	-999	-999	-999	-999	-999	-999	-999	-999	0	-999
253.653	253.66	2010-09-11 15:40:00	2010-09-11 15:49:59		-999		-999	-999	-999	-999	-999	-999	-999	-999	-999	-999	-999	-999	-999	-999	0	-999
253.66	253.667	2010-09-11 15:49:59	2010-09-11 16:00:00		-999		-999	-999	-999	-999	-999	-999	-999	-999	-999	-999	-999	-999	-999	-999	0	-999
253.667	253.674	2010-09-11 16:00:00	2010-09-11 16:09:59		-999		-999	-999	-999	-999	-999	-999	-999	-999	-999	-999	-999	-999	-999	-999	0	-999
253.674	253.681	2010-09-11 16:09:59	2010-09-11 16:20:00		-999		-999	-999	-999	-999	-999	-999	-999	-999	-999	-999	-999	-999	-999	-999	0	-999
253.681	253.688	2010-09-11 16:20:00	2010-09-11 16:30:00		-999		-999	-999	-999	-999	-999	-999	-999	-999	-999	-999	-999	-999	-999	-999	0	-999
253.688	253.694	2010-09-11 16:30:00	2010-09-11 16:39:59		-999		-999	-999	-999	-999	-999	-999	-999	-999	-999	-999	-999	-999	-999	-999	0	-999
253.694	253.701	2010-09-11 16:39:59	2010-09-11 16:50:00		-999		-999	-999	-999	-999	-999	-999	-999	-999	-999	-999	-999	-999	-999	-999	0	-999
253.701	253.708	2010-09-11 16:50:00	2010-09-11 16:59:59		-999		-999	-999	-999	-999	-999	-999	-999	-999	-999	-999	-999	-999	-999	-999	0	-999
253.708	253.715	2010-09-11 16:59:59	2010-09-11 17:10:00		-999		-999	225	-999	-999	-999	-999	-999	-999	-999	-999	-999	-999	-999	-999	0	4.2
253.715	253.722	2010-09-11 17:10:00	2010-09-11 17:19:59		-999		-999	225	-999	-999	-999	-999	-999	-999	-999	-999	-999	-999	-999	-999	0	4.1
253.722	253.729	2010-09-11 17:19:59	2010-09-11 17:30:00		-999		-999	225	-999	-999	-999	-999	-999	-999	-999	-999	-999	-999	-999	-999	0	3.9
253.729	253.736	2010-09-11 17:30:00	2010-09-11 17:39:59		-999		-999	231	-999	-999	-999	-999	-999	-999	-999	-999	-999	-999	-999	-999	0	3.7
253.736	253.743	2010-09-11 17:39:59	2010-09-11 17:50:00		-999		-999	225	-999	-999	-999	-999	-999	-999	-999	-999	-999	-999	-999	-999	0	3.1
253.743	253.75	2010-09-11 17:50:00	2010-09-11 18:00:00		-999		-999	219	-999	-999	-999	-999	-999	-999	-999	-999	-999	-999	-999	-999	0	3.7
253.75	253.757	2010-09-11 18:00:00	2010-09-11 18:09:59		-999		-999	217	-999	-999	-999	-999	-999	-999	-999	-999	-999	-999	-999	-999	0	3.1
253.757	253.764	2010-09-11 18:09:59	2010-09-11 18:20:00		-999		-999	219	-999	-999	-999	-999	-999	-999	-999	-999	-999	-999	-999	-999	0	3.6
253.764	253.771	2010-09-11 18:20:00	2010-09-11 18:29:59		-999		-999	231	-999	-999	-999	-999	-999	-999	-999	-999	-999	-999	-999	-999	0	4.2
253.771	253.778	2010-09-11 18:29:59	2010-09-11 18:40:00		-999		-999	228	-999	-999	-999	-999	-999	-999	-999	-999	-999	-999	-999	-999	0	3.8
253.778	253.785	2010-09-11 18:40:00	2010-09-11 18:49:59		-999		-999	225	-999	-999	-999	-999	-999	-999	-999	-999	-999	-999	-999	-999	0	3.8
253.785	253.792	2010-09-11 18:49:59	2010-09-11 19:00:00		-999		-999	225	-999	-999	-999	-999	-999	-999	-999	-999	-999	-999	-999	-999	0	3.6
253.792	253.799	2010-09-11 19:00:00	2010-09-11 19:09:59		-999		-999	216	-999	-999	-999	-999	-999	-999	-999	-999	-999	-999	-999	-999	0	2.6
253.799	253.806	2010-09-11 19:09:59	2010-09-11 19:20:00		-999		-999	211	-999	-999	-999	-999	-999	-999	-999	-999	-999	-999	-999	-999	0	2.4
253.806	253.812	2010-09-11 19:20:00	2010-09-11 19:30:00		-999		-999	215	-999	-999	-999	-999	-999	-999	-999	-999	-999	-999	-999	-999	0	1.8
253.812	253.819	2010-09-11 19:30:00	2010-09-11 19:39:59		-999		-999	211	-999	-999	-999	-999	-999	-999	-999	-999	-999	-999	-999	-999	0	1.6
253.819	253.826	2010-09-11 19:39:59	2010-09-11 19:50:00		-999		-999	206	-999	-999	-999	-999	-999	-999	-999	-999	-999	-999	-999	-999	0	1.8
253.826	253.833	2010-09-11 19:50:00	2010-09-11 19:59:59		-999		-999	211	-999	-999	-999	-999	-999	-999	-999	-999	-999	-999	-999	-999	0	2.2
253.833	253.84	2010-09-11 19:59:59	2010-09-11 20:10:00		-999		-999	198	-999	-999	-999	-999	-999	-999	-999	-999	-999	-999	-999	-999	0	1.8
253.84	253.847	2010-09-11 20:10:00	2010-09-11 20:19:59		-999		-999	203	-999	-999	-999	-999	-999	-999	-999	-999	-999	-999	-999	-999	0	2.2
253.847	253.854	2010-09-11 20:19:59	2010-09-11 20:30:00		-999		-999	202	-999	-999	-999	-999	-999	-999	-999	-999	-999	-999	-999	-999	0	2
253.854	253.861	2010-09-11 20:30:00	2010-09-11 20:39:59		-999		-999	216	-999	-999	-999	-999	-999	-999	-999	-999	-999	-999	-999	-999	0	1.7
253.861	253.868	2010-09-11 20:39:59	2010-09-11 20:50:00		-999		-999	220	-999	-999	-999	-999	-999	-999	-999	-999	-999	-999	-999	-999	0	1.6
253.868	253.875	2010-09-11 20:50:00	2010-09-11 21:00:00		-999		-999	215	-999	-999	-999	-999	-999	-999	-999	-999	-999	-999	-999	-999	0	1.9
253.875	253.882	2010-09-11 21:00:00	2010-09-11 21:09:59		-999		-999	218	-999	-999	-999	-999	-999	-999	-999	-999	-999	-999	-999	-999	0	2.1
253.882	253.889	2010-09-11 21:09:59	2010-09-11 21:20:00		-999		-999	218	-999	-999	-999	-999	-999	-999	-999	-999	-999	-999	-999	-999	0	2.2
253.889	253.896	2010-09-11 21:20:00	2010-09-11 21:29:59		-999		-999	222	-999	-999	-999	-999	-999	-999	-999	-999	-999	-999	-999	-999	0	2
253.896	253.903	2010-09-11 21:29:59	2010-09-11 21:40:00		-999		-999	231	-999	-999	-999	-999	-999	-999	-999	-999	-999	-999	-999	-999	0	2.2
253.903	253.91	2010-09-11 21:40:00	2010-09-11 21:49:59		-999		-999	242	-999	-999	-999	-999	-999	-999	-999	-999	-999	-999	-999	-999	0	1.8
253.91	253.917	2010-09-11 21:49:59	2010-09-11 22:00:00		-999		-999	237	-999	-999	-999	-999	-999	-999	-999	-999	-999	-999	-999	-999	0	2.2
253.917	253.924	2010-09-11 22:00:00	2010-09-11 22:09:59		-999		-999	235	-999	-999	-999	-999	-999	-999	-999	-999	-999	-999	-999	-999	0	2.2
253.924	253.931	2010-09-11 22:09:59	2010-09-11 22:20:00		-999		-999	240	-999	-999	-999	-999	-999	-999	-999	-999	-999	-999	-999	-999	0	2.4
253.931	253.938	2010-09-11 22:20:00	2010-09-11 22:30:00		-999		-999	228	-999	-999	-999	-999	-999	-999	-999	-999	-999	-999	-999	-999	0	2.3
253.938	253.944	2010-09-11 22:30:00	2010-09-11 22:39:59		-999		-999	230	-999	-999	-999	-999	-999	-999	-999	-999	-999	-999	-999	-999	0	2.6
253.944	253.951	2010-09-11 22:39:59	2010-09-11 22:50:00		-999		-999	241	-999	-999	-999	-999	-999	-999	-999	-999	-999	-999	-999	-999	0	2.9
253.951	253.958	2010-09-11 22:50:00	2010-09-11 22:59:59		-999		-999	238	-999	-999	-999	-999	-999	-999	-999	-999	-999	-999	-999	-999	0	3
253.958	253.965	2010-09-11 22:59:59	2010-09-11 23:10:00		-999		-999	240	-999	-999	-999	-999	-999	-999	-999	-999	-999	-999	-999	-999	0	3.1
253.965	253.972	2010-09-11 23:10:00	2010-09-11 23:19:59		-999		-999	239	-999	-999	-999	-999	-999	-999	-999	-999	-999	-999	-999	-999	0	3.3
253.972	253.979	2010-09-11 23:19:59	2010-09-11 23:30:00		-999		-999	242	-999	-999	-999	-999	-999	-999	-999	-999	-999	-999	-999	-999	0	3.5
253.979	253.986	2010-09-11 23:30:00	2010-09-11 23:39:59		-999		-999	240	-999	-999	-999	-999	-999	-999	-999	-999	-999	-999	-999	-999	0	3.6
253.986	253.993	2010-09-11 23:39:59	2010-09-11 23:50:00		-999		-999	241	-999	-999	-999	-999	-999	-999	-999	-999	-999	-999	-999	-999	0	3.7
253.993	254	2010-09-11 23:50:00	2010-09-12		-999		-999	241	-999	-999	-999	-999	-999	-999	-999	-999	-999	-999	-999	-999	0	4
254	254.007	2010-09-12	2010-09-12 00:09:59		-999		-999	242	-999	-999	-999	-999	-999	-999	-999	-999	-999	-999	-999	-999	0	4
254.007	254.014	2010-09-12 00:09:59	2010-09-12 00:20:00		-999		-999	239	-999	-999	-999	-999	-999	-999	-999	-999	-999	-999	-999	-999	0	4
254.014	254.021	2010-09-12 00:20:00	2010-09-12 00:29:59		-999		-999	245	-999	-999	-999	-999	-999	-999	-999	-999	-999	-999	-999	-999	0	3.5
254.021	254.028	2010-09-12 00:29:59	2010-09-12 00:40:00		-999		-999	230	-999	-999	-999	-999	-999	-999	-999	-999	-999	-999	-999	-999	0	2.9
254.028	254.035	2010-09-12 00:40:00	2010-09-12 00:49:59		-999		-999	238	-999	-999	-999	-999	-999	-999	-999	-999	-999	-999	-999	-999	0	3
254.035	254.042	2010-09-12 00:49:59	2010-09-12 01:00:00		-999		-999	240	-999	-999	-999	-999	-999	-999	-999	-999	-999	-999	-999	-999	0	3.4
254.042	254.049	2010-09-12 01:00:00	2010-09-12 01:09:59		-999		-999	238	-999	-999	-999	-999	-999	-999	-999	-999	-999	-999	-999	-999	0	3.6
254.049	254.056	2010-09-12 01:09:59	2010-09-12 01:20:00		-999		-999	237	-999	-999	-999	-999	-999	-999	-999	-999	-999	-999	-999	-999	0	3.3
254.056	254.062	2010-09-12 01:20:00	2010-09-12 01:30:00		-999		-999	242	-999	-999	-999	-999	-999	-999	-999	-999	-999	-999	-999	-999	0	3.3
254.062	254.069	2010-09-12 01:30:00	2010-09-12 01:39:59		-999		-999	240	-999	-999	-999	-999	-999	-999	-999	-999	-999	-999	-999	-999	0	3
254.069	254.076	2010-09-12 01:39:59	2010-09-12 01:50:00		-999		-999	238	-999	-999	-999	-999	-999	-999	-999	-999	-999	-999	-999	-999	0	3.1
254.076	254.083	2010-09-12 01:50:00	2010-09-12 01:59:59		-999		-999	235	-999	-999	-999	-999	-999	-999	-999	-999	-999	-999	-999	-999	0	2.7
254.083	254.09	2010-09-12 01:59:59	2010-09-12 02:10:00		-999		-999	239	-999	-999	-999	-999	-999	-999	-999	-999	-999	-999	-999	-999	0	2.5
254.09	254.097	2010-09-12 02:10:00	2010-09-12 02:19:59		-999		-999	231	-999	-999	-999	-999	-999	-999	-999	-999	-999	-999	-999	-999	0	3.2
254.097	254.104	2010-09-12 02:19:59	2010-09-12 02:30:00		-999		-999	231	-999	-999	-999	-999	-999	-999	-999	-999	-999	-999	-999	-999	0	2.8
254.104	254.111	2010-09-12 02:30:00	2010-09-12 02:39:59		-999		-999	233	-999	-999	-999	-999	-999	-999	-999	-999	-999	-999	-999	-999	0	2.5
254.111	254.118	2010-09-12 02:39:59	2010-09-12 02:50:00		-999		-999	238	-999	-999	-999	-999	-999	-999	-999	-999	-999	-999	-999	-999	0	2.5
254.118	254.125	2010-09-12 02:50:00	2010-09-12 03:00:00		-999		-999	237	-999	-999	-999	-999	-999	-999	-999	-999	-999	-999	-999	-999	0	2.2
254.125	254.132	2010-09-12 03:00:00	2010-09-12 03:09:59		-999		-999	237	-999	-999	-999	-999	-999	-999	-999	-999	-999	-999	-999	-999	0	2.3
254.132	254.139	2010-09-12 03:09:59	2010-09-12 03:20:00		-999		-999	235	-999	-999	-999	-999	-999	-999	-999	-999	-999	-999	-999	-999	0	2.2
254.139	254.146	2010-09-12 03:20:00	2010-09-12 03:29:59		-999		-999	227	-999	-999	-999	-999	-999	-999	-999	-999	-999	-999	-999	-999	0	2
254.146	254.153	2010-09-12 03:29:59	2010-09-12 03:40:00		-999		-999	227	-999	-999	-999	-999	-999	-999	-999	-999	-999	-999	-999	-999	0	2
254.153	254.16	2010-09-12 03:40:00	2010-09-12 03:49:59		-999		-999	233	-999	-999	-999	-999	-999	-999	-999	-999	-999	-999	-999	-999	0	2.1
254.16	254.167	2010-09-12 03:49:59	2010-09-12 04:00:00		-999		-999	239	-999	-999	-999	-999	-999	-999	-999	-999	-999	-999	-999	-999	0	2
254.167	254.174	2010-09-12 04:00:00	2010-09-12 04:09:59		-999		-999	237	-999	-999	-999	-999	-999	-999	-999	-999	-999	-999	-999	-999	0	2.1
254.174	254.181	2010-09-12 04:09:59	2010-09-12 04:20:00		-999		-999	237	-999	-999	-999	-999	-999	-999	-999	-999	-999	-999	-999	-999	0	2.1
254.181	254.188	2010-09-12 04:20:00	2010-09-12 04:30:00		-999		-999	234	-999	-999	-999	-999	-999	-999	-999	-999	-999	-999	-999	-999	0	2.1
254.188	254.194	2010-09-12 04:30:00	2010-09-12 04:39:59		-999		-999	231	-999	-999	-999	-999	-999	-999	-999	-999	-999	-999	-999	-999	0	2.1
254.194	254.201	2010-09-12 04:39:59	2010-09-12 04:50:00		-999		-999	238	-999	-999	-999	-999	-999	-999	-999	-999	-999	-999	-999	-999	0	2.2
254.201	254.208	2010-09-12 04:50:00	2010-09-12 04:59:59		-999		-999	242	-999	-999	-999	-999	-999	-999	-999	-999	-999	-999	-999	-999	0	2.3
254.208	254.215	2010-09-12 04:59:59	2010-09-12 05:10:00		-999		-999	241	-999	-999	-999	-999	-999	-999	-999	-999	-999	-999	-999	-999	0	2.3
254.215	254.222	2010-09-12 05:10:00	2010-09-12 05:19:59		-999		-999	238	-999	-999	-999	-999	-999	-999	-999	-999	-999	-999	-999	-999	0	2.1
254.222	254.229	2010-09-12 05:19:59	2010-09-12 05:30:00		-999		-999	238	-999	-999	-999	-999	-999	-999	-999	-999	-999	-999	-999	-999	0	2
254.229	254.236	2010-09-12 05:30:00	2010-09-12 05:39:59		-999		-999	238	-999	-999	-999	-999	-999	-999	-999	-999	-999	-999	-999	-999	0	1.9
254.236	254.243	2010-09-12 05:39:59	2010-09-12 05:50:00		-999		-999	242	-999	-999	-999	-999	-999	-999	-999	-999	-999	-999	-999	-999	0	1.9
254.243	254.25	2010-09-12 05:50:00	2010-09-12 06:00:00		-999		-999	236	-999	-999	-999	-999	-999	-999	-999	-999	-999	-999	-999	-999	0	2.1
254.25	254.257	2010-09-12 06:00:00	2010-09-12 06:09:59		-999		-999	235	-999	-999	-999	-999	-999	-999	-999	-999	-999	-999	-999	-999	0	1.9
254.257	254.264	2010-09-12 06:09:59	2010-09-12 06:20:00		-999		-999	240	-999	-999	-999	-999	-999	-999	-999	-999	-999	-999	-999	-999	0	1.9
254.264	254.271	2010-09-12 06:20:00	2010-09-12 06:29:59		-999		-999	243	-999	-999	-999	-999	-999	-999	-999	-999	-999	-999	-999	-999	0	2
254.271	254.278	2010-09-12 06:29:59	2010-09-12 06:40:00		-999		-999	238	-999	-999	-999	-999	-999	-999	-999	-999	-999	-999	-999	-999	0	1.8
254.278	254.285	2010-09-12 06:40:00	2010-09-12 06:49:59		-999		-999	235	-999	-999	-999	-999	-999	-999	-999	-999	-999	-999	-999	-999	0	1.6
254.285	254.292	2010-09-12 06:49:59	2010-09-12 07:00:00		-999		-999	235	-999	-999	-999	-999	-999	-999	-999	-999	-999	-999	-999	-999	0	1.5
254.292	254.299	2010-09-12 07:00:00	2010-09-12 07:09:59		-999		-999	231	-999	-999	-999	-999	-999	-999	-999	-999	-999	-999	-999	-999	0	1.6
254.299	254.306	2010-09-12 07:09:59	2010-09-12 07:20:00		-999		-999	233	-999	-999	-999	-999	-999	-999	-999	-999	-999	-999	-999	-999	0	1.6
254.306	254.312	2010-09-12 07:20:00	2010-09-12 07:30:00		-999		-999	242	-999	-999	-999	-999	-999	-999	-999	-999	-999	-999	-999	-999	0	2
254.312	254.319	2010-09-12 07:30:00	2010-09-12 07:39:59		-999		-999	236	-999	-999	-999	-999	-999	-999	-999	-999	-999	-999	-999	-999	0	2.2
254.319	254.326	2010-09-12 07:39:59	2010-09-12 07:50:00		-999		-999	238	-999	-999	-999	-999	-999	-999	-999	-999	-999	-999	-999	-999	0	1.8
254.326	254.333	2010-09-12 07:50:00	2010-09-12 07:59:59		-999		-999	234	-999	-999	-999	-999	-999	-999	-999	-999	-999	-999	-999	-999	0	1.9
254.333	254.34	2010-09-12 07:59:59	2010-09-12 08:10:00		-999		-999	225	-999	-999	-999	-999	-999	-999	-999	-999	-999	-999	-999	-999	0	1.7
254.34	254.347	2010-09-12 08:10:00	2010-09-12 08:19:59		-999		-999	228	-999	-999	-999	-999	-999	-999	-999	-999	-999	-999	-999	-999	0	1.5
254.347	254.354	2010-09-12 08:19:59	2010-09-12 08:30:00		-999		-999	229	-999	-999	-999	-999	-999	-999	-999	-999	-999	-999	-999	-999	0	1.8
254.354	254.361	2010-09-12 08:30:00	2010-09-12 08:39:59		-999		-999	222	-999	-999	-999	-999	-999	-999	-999	-999	-999	-999	-999	-999	0	2.2
254.361	254.368	2010-09-12 08:39:59	2010-09-12 08:50:00		-999		-999	223	-999	-999	-999	-999	-999	-999	-999	-999	-999	-999	-999	-999	0	1.9
254.368	254.375	2010-09-12 08:50:00	2010-09-12 09:00:00		-999		-999	221	-999	-999	-999	-999	-999	-999	-999	-999	-999	-999	-999	-999	0	2.1
254.375	254.382	2010-09-12 09:00:00	2010-09-12 09:09:59		-999		-999	218	-999	-999	-999	-999	-999	-999	-999	-999	-999	-999	-999	-999	0	2.7
254.382	254.389	2010-09-12 09:09:59	2010-09-12 09:20:00		-999		-999	218	-999	-999	-999	-999	-999	-999	-999	-999	-999	-999	-999	-999	0	2.6
254.389	254.396	2010-09-12 09:20:00	2010-09-12 09:29:59		-999		-999	216	-999	-999	-999	-999	-999	-999	-999	-999	-999	-999	-999	-999	0	3.1
254.396	254.403	2010-09-12 09:29:59	2010-09-12 09:40:00		-999		-999	213	-999	-999	-999	-999	-999	-999	-999	-999	-999	-999	-999	-999	0	2.9
254.403	254.41	2010-09-12 09:40:00	2010-09-12 09:49:59		-999		-999	219	-999	-999	-999	-999	-999	-999	-999	-999	-999	-999	-999	-999	0	2.8
254.41	254.417	2010-09-12 09:49:59	2010-09-12 10:00:00		-999		-999	218	-999	-999	-999	-999	-999	-999	-999	-999	-999	-999	-999	-999	0	3.6
254.417	254.424	2010-09-12 10:00:00	2010-09-12 10:09:59		-999		-999	223	-999	-999	-999	-999	-999	-999	-999	-999	-999	-999	-999	-999	0	3.6
254.424	254.431	2010-09-12 10:09:59	2010-09-12 10:20:00		-999		-999	211	-999	-999	-999	-999	-999	-999	-999	-999	-999	-999	-999	-999	0	3.8
254.431	254.438	2010-09-12 10:20:00	2010-09-12 10:30:00		-999		-999	217	-999	-999	-999	-999	-999	-999	-999	-999	-999	-999	-999	-999	0	4.1
254.438	254.444	2010-09-12 10:30:00	2010-09-12 10:39:59		-999		-999	224	-999	-999	-999	-999	-999	-999	-999	-999	-999	-999	-999	-999	0	3.9
254.444	254.451	2010-09-12 10:39:59	2010-09-12 10:50:00		-999		-999	222	-999	-999	-999	-999	-999	-999	-999	-999	-999	-999	-999	-999	0	4.4
254.451	254.458	2010-09-12 10:50:00	2010-09-12 10:59:59		-999		-999	216	-999	-999	-999	-999	-999	-999	-999	-999	-999	-999	-999	-999	0	3.9
254.458	254.465	2010-09-12 10:59:59	2010-09-12 11:10:00		-999		-999	200	-999	-999	-999	-999	-999	-999	-999	-999	-999	-999	-999	-999	0	3.2
254.465	254.472	2010-09-12 11:10:00	2010-09-12 11:19:59		-999		-999	218	-999	-999	-999	-999	-999	-999	-999	-999	-999	-999	-999	-999	0	3.1
254.472	254.479	2010-09-12 11:19:59	2010-09-12 11:30:00		-999		-999	216	-999	-999	-999	-999	-999	-999	-999	-999	-999	-999	-999	-999	0	3.8
254.479	254.486	2010-09-12 11:30:00	2010-09-12 11:39:59		-999		-999	224	-999	-999	-999	-999	-999	-999	-999	-999	-999	-999	-999	-999	0	4
254.486	254.493	2010-09-12 11:39:59	2010-09-12 11:50:00		-999		-999	230	-999	-999	-999	-999	-999	-999	-999	-999	-999	-999	-999	-999	0	3.9
254.493	254.5	2010-09-12 11:50:00	2010-09-12 12:00:00		-999		-999	221	-999	-999	-999	-999	-999	-999	-999	-999	-999	-999	-999	-999	0	4.1
254.5	254.507	2010-09-12 12:00:00	2010-09-12 12:09:59		-999		-999	230	-999	-999	-999	-999	-999	-999	-999	-999	-999	-999	-999	-999	0	4.4
254.507	254.514	2010-09-12 12:09:59	2010-09-12 12:20:00		-999		-999	240	-999	-999	-999	-999	-999	-999	-999	-999	-999	-999	-999	-999	0	3.1
254.514	254.521	2010-09-12 12:20:00	2010-09-12 12:29:59		-999		-999	227	-999	-999	-999	-999	-999	-999	-999	-999	-999	-999	-999	-999	0	3.2
254.521	254.528	2010-09-12 12:29:59	2010-09-12 12:40:00		-999		-999	243	-999	-999	-999	-999	-999	-999	-999	-999	-999	-999	-999	-999	0	2.8
254.528	254.535	2010-09-12 12:40:00	2010-09-12 12:49:59		-999		-999	240	-999	-999	-999	-999	-999	-999	-999	-999	-999	-999	-999	-999	0	3
254.535	254.542	2010-09-12 12:49:59	2010-09-12 13:00:00		-999		-999	235	-999	-999	-999	-999	-999	-999	-999	-999	-999	-999	-999	-999	0	2.8
254.542	254.549	2010-09-12 13:00:00	2010-09-12 13:09:59		-999		-999	214	-999	-999	-999	-999	-999	-999	-999	-999	-999	-999	-999	-999	0	3
254.549	254.556	2010-09-12 13:09:59	2010-09-12 13:20:00		-999		-999	216	-999	-999	-999	-999	-999	-999	-999	-999	-999	-999	-999	-999	0	3.6
254.556	254.562	2010-09-12 13:20:00	2010-09-12 13:30:00		-999		-999	240	-999	-999	-999	-999	-999	-999	-999	-999	-999	-999	-999	-999	0	2.6
254.562	254.569	2010-09-12 13:30:00	2010-09-12 13:39:59		-999		-999	233	-999	-999	-999	-999	-999	-999	-999	-999	-999	-999	-999	-999	0	2.6
254.569	254.576	2010-09-12 13:39:59	2010-09-12 13:50:00		-999		-999	215	-999	-999	-999	-999	-999	-999	-999	-999	-999	-999	-999	-999	0	2.9
254.576	254.583	2010-09-12 13:50:00	2010-09-12 13:59:59		-999		-999	242	-999	-999	-999	-999	-999	-999	-999	-999	-999	-999	-999	-999	0	3.5
254.583	254.59	2010-09-12 13:59:59	2010-09-12 14:10:00		-999		-999	229	-999	-999	-999	-999	-999	-999	-999	-999	-999	-999	-999	-999	0	3
254.59	254.597	2010-09-12 14:10:00	2010-09-12 14:19:59		-999		-999	243	-999	-999	-999	-999	-999	-999	-999	-999	-999	-999	-999	-999	0	3.2
254.597	254.604	2010-09-12 14:19:59	2010-09-12 14:30:00		-999		-999	220	-999	-999	-999	-999	-999	-999	-999	-999	-999	-999	-999	-999	0	2.7
254.604	254.611	2010-09-12 14:30:00	2010-09-12 14:39:59		-999		-999	241	-999	-999	-999	-999	-999	-999	-999	-999	-999	-999	-999	-999	0	2.8
254.611	254.618	2010-09-12 14:39:59	2010-09-12 14:50:00		-999		-999	250	-999	-999	-999	-999	-999	-999	-999	-999	-999	-999	-999	-999	0	2.2
254.618	254.625	2010-09-12 14:50:00	2010-09-12 15:00:00		-999		-999	219	-999	-999	-999	-999	-999	-999	-999	-999	-999	-999	-999	-999	0	2.5
254.625	254.632	2010-09-12 15:00:00	2010-09-12 15:09:59		-999		-999	218	-999	-999	-999	-999	-999	-999	-999	-999	-999	-999	-999	-999	0	2.2
254.632	254.639	2010-09-12 15:09:59	2010-09-12 15:20:00		-999		-999	226	-999	-999	-999	-999	-999	-999	-999	-999	-999	-999	-999	-999	0	1.8
254.639	254.646	2010-09-12 15:20:00	2010-09-12 15:29:59		-999		-999	219	-999	-999	-999	-999	-999	-999	-999	-999	-999	-999	-999	-999	0	2
254.646	254.653	2010-09-12 15:29:59	2010-09-12 15:40:00		-999		-999	205	-999	-999	-999	-999	-999	-999	-999	-999	-999	-999	-999	-999	0	2.1
254.653	254.66	2010-09-12 15:40:00	2010-09-12 15:49:59		-999		-999	228	-999	-999	-999	-999	-999	-999	-999	-999	-999	-999	-999	-999	0	1.9
254.66	254.667	2010-09-12 15:49:59	2010-09-12 16:00:00		-999		-999	249	-999	-999	-999	-999	-999	-999	-999	-999	-999	-999	-999	-999	0	1.2
254.667	254.674	2010-09-12 16:00:00	2010-09-12 16:09:59		-999		-999	238	-999	-999	-999	-999	-999	-999	-999	-999	-999	-999	-999	-999	0	2.1
254.674	254.681	2010-09-12 16:09:59	2010-09-12 16:20:00		-999		-999	234	-999	-999	-999	-999	-999	-999	-999	-999	-999	-999	-999	-999	0	1.2
254.681	254.688	2010-09-12 16:20:00	2010-09-12 16:30:00		-999		-999	190	-999	-999	-999	-999	-999	-999	-999	-999	-999	-999	-999	-999	0	0.9
254.688	254.694	2010-09-12 16:30:00	2010-09-12 16:39:59		-999		-999	233	-999	-999	-999	-999	-999	-999	-999	-999	-999	-999	-999	-999	0	1.3
254.694	254.701	2010-09-12 16:39:59	2010-09-12 16:50:00		-999		-999	223	-999	-999	-999	-999	-999	-999	-999	-999	-999	-999	-999	-999	0	1.4
254.701	254.708	2010-09-12 16:50:00	2010-09-12 16:59:59		-999		-999	276	-999	-999	-999	-999	-999	-999	-999	-999	-999	-999	-999	-999	0	0.6
254.708	254.715	2010-09-12 16:59:59	2010-09-12 17:10:00		-999		-999	262	-999	-999	-999	-999	-999	-999	-999	-999	-999	-999	-999	-999	0	1.5
254.715	254.722	2010-09-12 17:10:00	2010-09-12 17:19:59		-999		-999	224	-999	-999	-999	-999	-999	-999	-999	-999	-999	-999	-999	-999	0	1.2
254.722	254.729	2010-09-12 17:19:59	2010-09-12 17:30:00		-999		-999	214	-999	-999	-999	-999	-999	-999	-999	-999	-999	-999	-999	-999	0	1
254.729	254.736	2010-09-12 17:30:00	2010-09-12 17:39:59		-999		-999	215	-999	-999	-999	-999	-999	-999	-999	-999	-999	-999	-999	-999	0	1.8
254.736	254.743	2010-09-12 17:39:59	2010-09-12 17:50:00		-999		-999	238	-999	-999	-999	-999	-999	-999	-999	-999	-999	-999	-999	-999	0	1.2
254.743	254.75	2010-09-12 17:50:00	2010-09-12 18:00:00		-999		-999	242	-999	-999	-999	-999	-999	-999	-999	-999	-999	-999	-999	-999	0	0.8
254.75	254.757	2010-09-12 18:00:00	2010-09-12 18:09:59		-999		-999	242	-999	-999	-999	-999	-999	-999	-999	-999	-999	-999	-999	-999	0	0.4
254.757	254.764	2010-09-12 18:09:59	2010-09-12 18:20:00		-999		-999	244	-999	-999	-999	-999	-999	-999	-999	-999	-999	-999	-999	-999	0	0.4
254.764	254.771	2010-09-12 18:20:00	2010-09-12 18:29:59		-999		-999	232	-999	-999	-999	-999	-999	-999	-999	-999	-999	-999	-999	-999	0	0.8
254.771	254.778	2010-09-12 18:29:59	2010-09-12 18:40:00		-999		-999	233	-999	-999	-999	-999	-999	-999	-999	-999	-999	-999	-999	-999	0	0.4
254.778	254.785	2010-09-12 18:40:00	2010-09-12 18:49:59		-999		-999	233	-999	-999	-999	-999	-999	-999	-999	-999	-999	-999	-999	-999	0	1.2
254.785	254.792	2010-09-12 18:49:59	2010-09-12 19:00:00		-999		-999	234	-999	-999	-999	-999	-999	0.2859	-999	-999	0.078	-999	-999	-999	0	1.1
254.792	254.799	2010-09-12 19:00:00	2010-09-12 19:09:59		-999		-999	245	-999	-999	-999	-999	-999	0.2684	-999	-999	0.0746	-999	-999	-999	0	0.9
254.799	254.806	2010-09-12 19:09:59	2010-09-12 19:20:00		-999		-999	244	-999	-999	-999	-999	-999	0.2605	-999	-999	0.0719	-999	-999	-999	0	1.2
254.806	254.812	2010-09-12 19:20:00	2010-09-12 19:30:00		-999		-999	247	-999	-999	-999	-999	-999	0.26295	-999	-999	0.06805	-999	-999	-999	0	1
254.812	254.819	2010-09-12 19:30:00	2010-09-12 19:39:59		-999		-999	243	-999	-999	-999	-999	-999	0.27265	-999	-999	0.06615	-999	-999	-999	0	1
254.819	254.826	2010-09-12 19:39:59	2010-09-12 19:50:00		-999		-999	247	-999	-999	-999	-999	-999	0.26755	-999	-999	0.0688	-999	-999	-999	0	1.6
254.826	254.833	2010-09-12 19:50:00	2010-09-12 19:59:59		-999		-999	248	-999	-999	-999	-999	-999	0.2634	-999	-999	0.0711	-999	-999	-999	0	1.2
254.833	254.84	2010-09-12 19:59:59	2010-09-12 20:10:00		-999		-999	248	-999	-999	-999	-999	-999	0.2576	-999	-999	0.07395	-999	-999	-999	0	0.8
254.84	254.847	2010-09-12 20:10:00	2010-09-12 20:19:59		-999		-999	248	-999	-999	-999	-999	-999	0.2507	-999	-999	0.0761	-999	-999	-999	0	0.7
254.847	254.854	2010-09-12 20:19:59	2010-09-12 20:30:00		-999		-999	248	-999	-999	-999	-999	-999	0.2398	-999	-999	0.078	-999	-999	-999	0	0.4
254.854	254.861	2010-09-12 20:30:00	2010-09-12 20:39:59		-999		-999	248	-999	-999	-999	-999	-999	0.23835	-999	-999	0.07295	-999	-999	-999	0	0.6
254.861	254.868	2010-09-12 20:39:59	2010-09-12 20:50:00		-999		-999	248	-999	-999	-999	-999	-999	0.29515	-999	-999	0.0856	-999	-999	-999	0	0.7
254.868	254.875	2010-09-12 20:50:00	2010-09-12 21:00:00		-999		-999	254	-999	-999	-999	-999	-999	0.304	-999	-999	0.0983	-999	-999	-999	0	0.4
254.875	254.882	2010-09-12 21:00:00	2010-09-12 21:09:59		-999		-999	278	-999	-999	-999	-999	-999	0.31035	-999	-999	0.1189	-999	-999	-999	0	0.6
254.882	254.889	2010-09-12 21:09:59	2010-09-12 21:20:00		-999		-999	250	-999	-999	-999	-999	-999	0.3141	-999	-999	0.14305	-999	-999	-999	0	1.4
254.889	254.896	2010-09-12 21:20:00	2010-09-12 21:29:59		-999		-999	257	-999	-999	-999	-999	-999	0.31265	-999	-999	0.16165	-999	-999	-999	0	1.3
254.896	254.903	2010-09-12 21:29:59	2010-09-12 21:40:00		-999		-999	259	-999	-999	-999	-999	-999	0.3029	-999	-999	0.1793	-999	-999	-999	0	0.6
254.903	254.91	2010-09-12 21:40:00	2010-09-12 21:49:59		-999		-999	259	-999	-999	-999	-999	-999	0.30235	-999	-999	0.1961	-999	-999	-999	0	0.7
254.91	254.917	2010-09-12 21:49:59	2010-09-12 22:00:00		-999		-999	259	-999	-999	-999	-999	-999	0.3016	-999	-999	0.20205	-999	-999	-999	0	0.6
254.917	254.924	2010-09-12 22:00:00	2010-09-12 22:09:59		-999		-999	290	-999	-999	-999	-999	-999	0.3013	-999	-999	0.2054	-999	-999	-999	0	0.6
254.924	254.931	2010-09-12 22:09:59	2010-09-12 22:20:00		-999		-999	28	-999	-999	-999	-999	-999	0.30055	-999	-999	0.2075	-999	-999	-999	0	1.4
254.931	254.938	2010-09-12 22:20:00	2010-09-12 22:30:00		-999		-999	16	-999	-999	-999	-999	-999	0.30035	-999	-999	0.20685	-999	-999	-999	0	1.6
254.938	254.944	2010-09-12 22:30:00	2010-09-12 22:39:59		-999		-999	15	-999	-999	-999	-999	-999	0.2755	-999	-999	0.20345	-999	-999	-999	0	1.7
254.944	254.951	2010-09-12 22:39:59	2010-09-12 22:50:00		-999		-999	8	-999	-999	-999	-999	-999	0.1926	-999	-999	0.19795	-999	-999	-999	0	1.6
254.951	254.958	2010-09-12 22:50:00	2010-09-12 22:59:59		-999		-999	342	-999	-999	-999	-999	-999	0.16865	-999	-999	0.19295	-999	-999	-999	0	2.3
254.958	254.965	2010-09-12 22:59:59	2010-09-12 23:10:00		-999		-999	341	-999	-999	-999	-999	-999	0.15385	-999	-999	0.1807	-999	-999	-999	0	2.4
254.965	254.972	2010-09-12 23:10:00	2010-09-12 23:19:59		-999		-999	345	-999	-999	-999	-999	-999	0.13525	-999	-999	0.16515	-999	-999	-999	0	2
254.972	254.979	2010-09-12 23:19:59	2010-09-12 23:30:00		-999		-999	359	-999	-999	-999	-999	-999	0.1123	-999	-999	0.15085	-999	-999	-999	0	1.9
254.979	254.986	2010-09-12 23:30:00	2010-09-12 23:39:59		-999		-999	0	-999	-999	0.105	-999	-999	0.0938	-999	-999	0.1309	-999	-999	-999	0	2
254.986	254.993	2010-09-12 23:39:59	2010-09-12 23:50:00		-999		-999	357	-999	-999	0.1	-999	-999	0.089	-999	-999	0.1023	-999	-999	-999	0	1.7
254.993	255	2010-09-12 23:50:00	2010-09-13		-999		-999	1	-999	-999	0.096	-999	-999	0.07105	-999	-999	0.08755	-999	-999	-999	0	2.2
255	255.007	2010-09-13	2010-09-13 00:09:59		-999		-999	5	-999	-999	0.093	-999	-999	0.06565	-999	-999	0.0796	-999	-999	-999	0	2.6
255.007	255.014	2010-09-13 00:09:59	2010-09-13 00:20:00		-999		-999	11	-999	-999	0.093	-999	-999	0.0643	-999	-999	0.09135	-999	-999	-999	0	2.9
255.014	255.021	2010-09-13 00:20:00	2010-09-13 00:29:59		-999		-999	8	-999	-999	0.098	-999	-999	0.0655	-999	-999	0.117	-999	-999	-999	0	2.7
255.021	255.028	2010-09-13 00:29:59	2010-09-13 00:40:00		-999		-999	7	0.096	0.043	0.102	-999	-999	0.0659	-999	-999	0.1355	-999	-999	-999	0	3.1
255.028	255.035	2010-09-13 00:40:00	2010-09-13 00:49:59		-999		-999	2	0.1	0.042	0.101	-999	-999	0.06745	-999	-999	0.14405	-999	-999	-999	0	3.4
255.035	255.042	2010-09-13 00:49:59	2010-09-13 01:00:00		-999		-999	1	0.097	0.041	0.099	-999	-999	0.068	-999	-999	0.1474	-999	-999	-999	0	3.4
255.042	255.049	2010-09-13 01:00:00	2010-09-13 01:09:59		-999		-999	0	0.098	0.04	0.099	-999	-999	0.07045	-999	-999	0.1496	0.0079	0	0.0079	1	3.1
255.049	255.056	2010-09-13 01:09:59	2010-09-13 01:20:00		-999		-999	15	0.096	0.039	0.096	-999	-999	0.0748	-999	-999	0.1482	0	0	0	0	3.5
255.056	255.062	2010-09-13 01:20:00	2010-09-13 01:30:00		-999		-999	4	0.093	0.037	0.094	-999	-999	0.0777	-999	-999	0.14775	0	0	0	0	3.9
255.062	255.069	2010-09-13 01:30:00	2010-09-13 01:39:59		-999		-999	7	0.09	0.036	0.092	-999	-999	0.07665	-999	-999	0.14835	0	0	0	0	3.2
255.069	255.076	2010-09-13 01:39:59	2010-09-13 01:50:00		-999		-999	6	0.087	0.035	0.09	-999	-999	0.05925	-999	-999	0.1494	0	0	0	0	3.5
255.076	255.083	2010-09-13 01:50:00	2010-09-13 01:59:59		-999		-999	356	0.085	0.035	0.088	-999	-999	0.05865	-999	-999	0.1514	0	0	0	0	3.8
255.083	255.09	2010-09-13 01:59:59	2010-09-13 02:10:00		-999		-999	351	0.083	0.035	0.081	-999	-999	0.05565	-999	-999	0.1609	0	0	0	0	3.7
255.09	255.097	2010-09-13 02:10:00	2010-09-13 02:19:59		-999		-999	355	0.081	0.035	0.062	-999	-999	0.05515	-999	-999	0.15905	0	0	0	0	3.2
255.097	255.104	2010-09-13 02:19:59	2010-09-13 02:30:00		-999		-999	356	0.079	0.035	0.058	-999	-999	0.05525	-999	-999	0.15165	0	0	0	0	3.7
255.104	255.111	2010-09-13 02:30:00	2010-09-13 02:39:59		-999		-999	352	0.078	0.035	0.057	-999	-999	0.0614	-999	-999	0.1481	0	0	0	0	3.5
255.111	255.118	2010-09-13 02:39:59	2010-09-13 02:50:00		-999		-999	3	0.076	0.035	0.057	-999	-999	0.0678	-999	-999	0.15685	0	0	0	0	3.7
255.118	255.125	2010-09-13 02:50:00	2010-09-13 03:00:00		-999		-999	3	0.075	0.036	0.057	-999	-999	0.0705	-999	-999	0.1593	0	0	0	0	3
255.125	255.132	2010-09-13 03:00:00	2010-09-13 03:09:59		-999		-999	1	0.075	0.034	0.057	-999	-999	0.07555	-999	-999	0.1741	0	0	0	0	3.6
255.132	255.139	2010-09-13 03:09:59	2010-09-13 03:20:00		-999		-999	4	0.074	0.035	0.057	-999	-999	0.0761	-999	-999	0.18625	0	0	0	0	3.2
255.139	255.146	2010-09-13 03:20:00	2010-09-13 03:29:59		-999		-999	359	0.074	0.036	0.057	-999	-999	0.07865	-999	-999	0.1915	0	0	0	0	3.5
255.146	255.153	2010-09-13 03:29:59	2010-09-13 03:40:00		-999		-999	5	0.074	0.036	0.057	-999	-999	0.0821	-999	-999	0.2043	0	0	0	0	3.3
255.153	255.16	2010-09-13 03:40:00	2010-09-13 03:49:59		-999		-999	7	0.074	0.037	0.058	-999	-999	0.08535	-999	-999	0.2187	0	0	0	0	3.7
255.16	255.167	2010-09-13 03:49:59	2010-09-13 04:00:00		-999		-999	11	0.073	0.038	0.059	-999	-999	0.09035	-999	-999	0.2318	0	0	0	0	3.4
255.167	255.174	2010-09-13 04:00:00	2010-09-13 04:09:59		-999		-999	356	0.072	0.037	0.059	-999	-999	0.09365	-999	-999	0.23915	0	0	0	0	3.6
255.174	255.181	2010-09-13 04:09:59	2010-09-13 04:20:00		-999		-999	7	0.068	0.037	0.055	-999	-999	0.0948	-999	-999	0.2488	0	0	0	0	3.9
255.181	255.188	2010-09-13 04:20:00	2010-09-13 04:30:00		-999		-999	4	0.059	0.039	0.046	-999	-999	0.09795	-999	-999	0.2583	0	0	0	0	3.3
255.188	255.194	2010-09-13 04:30:00	2010-09-13 04:39:59		-999		-999	2	0.048	0.041	0.035	-999	-999	0.09805	-999	-999	0.27255	0	0	0	0	3.5
255.194	255.201	2010-09-13 04:39:59	2010-09-13 04:50:00		-999		-999	11	0.041	0.043	0.03	-999	-999	0.09965	-999	-999	0.28585	0	0	0	0	3.8
255.201	255.208	2010-09-13 04:50:00	2010-09-13 04:59:59		-999		-999	20	0.041	0.045	0.028	-999	-999	0.09965	-999	-999	0.2937	0	0	0	0	4.5
255.208	255.215	2010-09-13 04:59:59	2010-09-13 05:10:00		-999		-999	10	0.038	0.047	0.022	-999	-999	0.1213	-999	-999	0.29805	0	0	0	0	4.5
255.215	255.222	2010-09-13 05:10:00	2010-09-13 05:19:59		-999		-999	11	0.058	0.053	0.029	-999	-999	0.132	-999	-999	0.29525	0	0	0	0	4.6
255.222	255.229	2010-09-13 05:19:59	2010-09-13 05:30:00		-999		-999	3	0.086	0.055	0.059	-999	-999	0.1539	-999	-999	0.31555	0	0	0	0	4
255.229	255.236	2010-09-13 05:30:00	2010-09-13 05:39:59		-999		-999	2	0.087	0.057	0.059	-999	-999	0.16905	-999	-999	0.3317	0	0	0	0	4.3
255.236	255.243	2010-09-13 05:39:59	2010-09-13 05:50:00		-999		-999	4	0.087	0.058	0.059	-999	-999	0.16955	-999	-999	0.33085	0	0	0	0	3.7
255.243	255.25	2010-09-13 05:50:00	2010-09-13 06:00:00		-999		-999	4	0.089	0.058	0.06	-999	-999	0.1687	-999	-999	0.327	0	0	0	0	4.2
255.25	255.257	2010-09-13 06:00:00	2010-09-13 06:09:59		-999		-999	6	0.09	0.058	0.061	-999	-999	0.1791	-999	-999	0.3354	0	0	0	0	4.2
255.257	255.264	2010-09-13 06:09:59	2010-09-13 06:20:00		-999		-999	5	0.092	0.059	0.061	-999	-999	0.18965	-999	-999	0.37465	0	0	0	0	3.5
255.264	255.271	2010-09-13 06:20:00	2010-09-13 06:29:59		-999		-999	1	0.094	0.062	0.061	-999	-999	0.19215	-999	-999	0.37805	0	0	0	0	4.5
255.271	255.278	2010-09-13 06:29:59	2010-09-13 06:40:00		-999		-999	5	0.098	0.066	0.061	-999	-999	0.19485	-999	-999	0.37045	0	0	0	0	3.8
255.278	255.285	2010-09-13 06:40:00	2010-09-13 06:49:59		-999		-999	11	0.103	0.067	0.064	-999	-999	0.19795	-999	-999	0.3577	0	0	0	0	3.7
255.285	255.292	2010-09-13 06:49:59	2010-09-13 07:00:00		-999		-999	5	0.107	0.069	0.065	-999	-999	0.2093	-999	-999	0.3541	0	0	0	0	3.7
255.292	255.299	2010-09-13 07:00:00	2010-09-13 07:09:59		-999		-999	358	0.108	0.071	0.065	-999	-999	0.2004	-999	-999	0.3453	0	0	0	0	3.2
255.299	255.306	2010-09-13 07:09:59	2010-09-13 07:20:00		-999		-999	6	0.11	0.075	0.065	-999	-999	0.1991	-999	-999	0.3427	0	0	0	0	3.5
255.306	255.312	2010-09-13 07:20:00	2010-09-13 07:30:00		-999		-999	360	0.111	0.078	0.065	-999	-999	0.2017	-999	-999	0.3255	0	0	0	0	3.8
255.312	255.319	2010-09-13 07:30:00	2010-09-13 07:39:59		-999		-999	360	0.114	0.081	0.065	-999	-999	0.20125	-999	-999	0.31445	0	0	0	1	3.4
255.319	255.326	2010-09-13 07:39:59	2010-09-13 07:50:00		-999		-999	5	0.115	0.083	0.065	-999	-999	0.20775	-999	-999	0.3255	0	0.1818	0.1818	1	2.3
255.326	255.333	2010-09-13 07:50:00	2010-09-13 07:59:59		-999		-999	356	0.117	0.087	0.065	-999	-999	0.20995	-999	-999	0.3397	0	0	0.2222	1	2.6
255.333	255.34	2010-09-13 07:59:59	2010-09-13 08:10:00		-999		-999	2	0.121	0.093	0.064	-999	-999	0.201	-999	-999	0.32865	0.1818	0.1818	0	1	3.4
255.34	255.347	2010-09-13 08:10:00	2010-09-13 08:19:59		-999		-999	0	0.122	0.095	0.065	-999	-999	0.1952	-999	-999	0.29055	0	0	0	1	4.9
255.347	255.354	2010-09-13 08:19:59	2010-09-13 08:30:00		-999		-999	6	0.122	0.096	0.065	-999	-999	0.1948	-999	-999	0.28335	0	0	0.2	1	3.8
255.354	255.361	2010-09-13 08:30:00	2010-09-13 08:39:59		-999		-999	357	0.122	0.097	0.066	-999	-999	0.193	-999	-999	0.292	0	0	0	0	5
255.361	255.368	2010-09-13 08:39:59	2010-09-13 08:50:00		-999		-999	5	0.123	0.099	0.066	-999	-999	0.193	-999	-999	0.3014	0	0	0	0	4.7
255.368	255.375	2010-09-13 08:50:00	2010-09-13 09:00:00		-999		-999	0	0.123	0.1	0.066	-999	-999	0.22565	-999	-999	0.3014	0	0	0	0	2.7
255.375	255.382	2010-09-13 09:00:00	2010-09-13 09:09:59		-999		-999	-999	0.124	0.101	0.066	-999	-999	0.22975	-999	-999	0.3021	0	-999	0	0	0
255.382	255.389	2010-09-13 09:09:59	2010-09-13 09:20:00		-999		-999	-999	0.116	0.099	0.063	-999	-999	0.2245	-999	-999	0.30405	0	-999	0	0	0
255.389	255.396	2010-09-13 09:20:00	2010-09-13 09:29:59		-999		-999	-999	0.098	0.1	0.038	-999	-999	0.21765	-999	-999	0.3014	0	-999	0	0	0
255.396	255.403	2010-09-13 09:29:59	2010-09-13 09:40:00		-999		-999	-999	0.098	0.1	0.038	-999	-999	0.21745	-999	-999	0.2907	0	-999	0.1818	1	0
255.403	255.41	2010-09-13 09:40:00	2010-09-13 09:49:59		-999		-999	-999	0.097	0.1	0.038	-999	-999	0.21	-999	-999	0.27285	0	-999	0	1	0
255.41	255.417	2010-09-13 09:49:59	2010-09-13 10:00:00		-999		-999	1	0.095	0.101	0.037	-999	-999	0.20985	-999	-999	0.253	0	-999	0	1	0
255.417	255.424	2010-09-13 10:00:00	2010-09-13 10:09:59		-999		-999	8	0.095	0.102	0.039	-999	-999	0.2134	-999	-999	0.25125	0	0	0.1818	1	3.5
255.424	255.431	2010-09-13 10:09:59	2010-09-13 10:20:00		-999		-999	359	0.092	0.102	0.04	-999	-999	0.21325	-999	-999	0.233	0	0	0	0	3.1
255.431	255.438	2010-09-13 10:20:00	2010-09-13 10:30:00		-999		-999	14	0.091	0.102	0.043	-999	-999	0.2176	-999	-999	0.2245	0	0	0	0	3.5
255.438	255.444	2010-09-13 10:30:00	2010-09-13 10:39:59		-999		-999	353	0.085	0.1	0.044	-999	-999	0.22755	-999	-999	0.2448	0	0	0	0	3.2
255.444	255.451	2010-09-13 10:39:59	2010-09-13 10:50:00		-999		-999	354	0.079	0.1	0.041	-999	-999	0.2286	-999	-999	0.2291	0	0	0	0	3.1
255.451	255.458	2010-09-13 10:50:00	2010-09-13 10:59:59		-999		-999	349	0.074	0.099	0.04	-999	-999	0.2019	-999	-999	0.22515	0	0	0	0	3
255.458	255.465	2010-09-13 10:59:59	2010-09-13 11:10:00		-999		-999	353	0.072	0.096	0.04	-999	-999	0.20265	-999	-999	0.22325	0	0	0	0	3.2
255.465	255.472	2010-09-13 11:10:00	2010-09-13 11:19:59		-999		-999	337	0.07	0.093	0.041	-999	-999	0.22695	-999	-999	0.217	0	0	0	0	3.5
255.472	255.479	2010-09-13 11:19:59	2010-09-13 11:30:00		-999		-999	350	0.068	0.089	0.041	-999	-999	0.21555	-999	-999	0.2104	0	0	0	0	3.2
255.479	255.486	2010-09-13 11:30:00	2010-09-13 11:39:59		-999		-999	338	0.065	0.089	0.041	-999	-999	0.2052	-999	-999	0.2146	0	0	0	0	3.3
255.486	255.493	2010-09-13 11:39:59	2010-09-13 11:50:00		-999		-999	333	0.064	0.085	0.04	-999	-999	0.20885	-999	-999	0.20745	0	0	0	0	2.6
255.493	255.5	2010-09-13 11:50:00	2010-09-13 12:00:00		-999		-999	345	0.061	0.082	0.04	-999	-999	0.2069	-999	-999	0.205	0	0	0	0	3.2
255.5	255.507	2010-09-13 12:00:00	2010-09-13 12:09:59		-999		-999	339	0.051	0.075	0.04	-999	-999	0.2113	-999	-999	0.19915	0	0	0	0	2.4
255.507	255.514	2010-09-13 12:09:59	2010-09-13 12:20:00		-999		-999	334	0.053	0.073	0.039	-999	-999	0.2334	-999	-999	0.19285	0	0	0	0	3.2
255.514	255.521	2010-09-13 12:20:00	2010-09-13 12:29:59		-999		-999	333	0.052	0.071	0.04	-999	-999	0.2523	-999	-999	0.23065	0	0	0.2222	1	3.6
255.521	255.528	2010-09-13 12:29:59	2010-09-13 12:40:00		-999		-999	325	0.051	0.068	0.039	0.0869	0.24	0.24125	0.07885	0.30355	0.2337	0	0	0	0	2.9
255.528	255.535	2010-09-13 12:40:00	2010-09-13 12:49:59		-999		-999	332	0.049	0.063	0.037	0.09155	0.2363	0.24205	0.0776	0.2982	0.23825	0	0	0	0	2.7
255.535	255.542	2010-09-13 12:49:59	2010-09-13 13:00:00		-999		-999	314	0.046	0.06	0.037	0.08875	0.2363	0.2357	0.0743	0.2982	0.24375	0	0	0	0	2.6
255.542	255.549	2010-09-13 13:00:00	2010-09-13 13:09:59		-999		-999	331	0.042	0.057	0.038	0.0863	0.2363	0.2367	0.07305	0.2982	0.25225	0	0	0	0	3.3
255.549	255.556	2010-09-13 13:09:59	2010-09-13 13:20:00		-999		-999	336	0.04	0.055	0.038	0.08355	0.2363	0.21505	0.07305	0.2982	0.26705	0	0	0	0	2
255.556	255.562	2010-09-13 13:20:00	2010-09-13 13:30:00		-999		-999	314	0.039	0.052	0.037	0.08065	0.2363	0.2285	0.0745	0.2982	0.28415	0	0	0	0	2
255.562	255.569	2010-09-13 13:30:00	2010-09-13 13:39:59		-999		-999	334	0.038	0.05	0.037	0.08175	0.12255	0.1201	0.0794	0.1487	0.1449	0	0	0	0	2.2
255.569	255.576	2010-09-13 13:39:59	2010-09-13 13:50:00		-999		-999	329	0.038	0.05	0.037	0.07405	-999	-999	0.081	-999	-999	0	0	0	0	1.5
255.576	255.583	2010-09-13 13:50:00	2010-09-13 13:59:59		-999		-999	329	0.039	0.052	0.037	0.0809	-999	-999	0.0806	-999	-999	0	0	0	0	1.8
255.583	255.59	2010-09-13 13:59:59	2010-09-13 14:10:00		-999		-999	318	0.04	0.055	0.037	0.09	-999	-999	0.08255	-999	-999	0	0	0	0	1.4
255.59	255.597	2010-09-13 14:10:00	2010-09-13 14:19:59		-999		-999	312	0.041	0.056	0.037	0.0912	-999	-999	0.08565	-999	-999	0	0	0	0	1.3
255.597	255.604	2010-09-13 14:19:59	2010-09-13 14:30:00		-999		-999	317	0.041	0.054	0.035	0.09385	-999	-999	0.0888	-999	-999	0	0	0	0	2
255.604	255.611	2010-09-13 14:30:00	2010-09-13 14:39:59		-999		-999	319	0.041	0.055	0.035	0.09315	NN	NN	0.08405	NN	NN	0	0	0	0	2.4
255.611	255.618	2010-09-13 14:39:59	2010-09-13 14:50:00		-999		-999	329	0.041	0.053	0.033	0.08925	0.13355	0.14925	0.09025	0.1451	0.08625	0	0	0	0	2.5
255.618	255.625	2010-09-13 14:50:00	2010-09-13 15:00:00		-999		-999	320	0.042	0.052	0.033	0.17215	0.06465	0.0984	0.09635	0.0774	0.0472	0	0	0	0	1.9
255.625	255.632	2010-09-13 15:00:00	2010-09-13 15:09:59		-999		-999	310	0.042	0.052	0.036	0.2712	0.1231	0.34435	0.1013	0.18415	0.109	0	0	0	0	2.2
255.632	255.639	2010-09-13 15:09:59	2010-09-13 15:20:00		-999		-999	304	0.041	0.053	0.04	0.30225	0.11645	0.36205	0.10635	0.19615	0.11485	0	0	0	0	1.8
255.639	255.646	2010-09-13 15:20:00	2010-09-13 15:29:59		-999		-999	295	0.041	0.055	0.047	0.40185	0.11515	0.44495	0.1257	0.20665	0.11685	0	0	0	0	2
255.646	255.653	2010-09-13 15:29:59	2010-09-13 15:40:00		-999		-999	290	0.039	0.052	0.047	0.4249	0.11455	0.4448	0.13955	0.21845	0.11845	0	0	0	0	3.5
255.653	255.66	2010-09-13 15:40:00	2010-09-13 15:49:59		-999		-999	288	0.039	0.051	0.047	0.42515	0.11385	0.44015	0.1362	0.21235	0.1154	0	0	0	0	2.2
255.66	255.667	2010-09-13 15:49:59	2010-09-13 16:00:00		-999		-999	303	0.038	0.05	0.048	0.42285	0.10705	0.4372	0.13925	0.2147	0.11175	0	0	0	0	2.5
255.667	255.674	2010-09-13 16:00:00	2010-09-13 16:09:59		-999		-999	292	0.041	0.05	0.051	0.4211	0.0981	0.42665	0.1452	0.21325	0.11015	0	0	0	0	2.7
255.674	255.681	2010-09-13 16:09:59	2010-09-13 16:20:00		-999		-999	290	0.04	0.05	0.058	0.4208	0.0983	0.4268	0.1448	0.21445	0.1101	0	0	0	0	3.1
255.681	255.688	2010-09-13 16:20:00	2010-09-13 16:30:00		-999		-999	299	0.05	0.05	0.069	0.42	0.10055	0.42705	0.1444	0.2142	0.10905	0	0	0	0	3.4
255.688	255.694	2010-09-13 16:30:00	2010-09-13 16:39:59		-999		-999	290	0.059	0.051	0.073	0.41985	0.0709	0.42135	0.1459	0.2189	0.11115	0	0	0	0	2.6
255.694	255.701	2010-09-13 16:39:59	2010-09-13 16:50:00		-999		-999	283	0.07	0.052	0.077	0.4338	0.0673	0.4334	0.1464	0.2136	0.1118	0	0	0	0	3.4
255.701	255.708	2010-09-13 16:50:00	2010-09-13 16:59:59		-999		-999	284	0.079	0.053	0.087	0.4206	0.06705	0.41425	0.14835	0.1982	0.10395	0	0	0	0	4
255.708	255.715	2010-09-13 16:59:59	2010-09-13 17:10:00		-999		-999	303	0.093	0.052	0.1	0.3747	0.0731	0.36725	0.151	0.18395	0.09825	0	0	0	0	3.2
255.715	255.722	2010-09-13 17:10:00	2010-09-13 17:19:59		-999		-999	293	0.108	0.052	0.113	0.3553	0.08715	0.34705	0.15305	0.16505	0.08775	0	0	0	0	2.7
255.722	255.729	2010-09-13 17:19:59	2010-09-13 17:30:00		-999		-999	297	0.133	0.053	0.133	0.16325	0.09275	0.1575	0.1318	0.14665	0.08085	0	0	0	0	2.3
255.729	255.736	2010-09-13 17:30:00	2010-09-13 17:39:59		-999		-999	305	0.163	0.053	0.161	0.06185	0.0969	0.06925	0.05225	0.1178	0.0687	0	0	0	0	3.1
255.736	255.743	2010-09-13 17:39:59	2010-09-13 17:50:00		-999		-999	287	0.189	0.054	0.182	0.0432	0.1008	0.0702	NN	0.11625	0.0675	0	0	0	0	2.7
255.743	255.75	2010-09-13 17:50:00	2010-09-13 18:00:00		-999		-999	286	0.214	0.05	0.205	0.039	0.1036	0.0773	NN	0.1133	0.09835	0	0	0	0	2.1
255.75	255.757	2010-09-13 18:00:00	2010-09-13 18:09:59		-999		-999	277	0.236	0.044	0.226	0.03375	0.10405	0.0826	NN	0.10685	0.1034	0	0	0	0	1.8
255.757	255.764	2010-09-13 18:09:59	2010-09-13 18:20:00		-999		-999	289	0.241	0.041	0.246	0.03245	0.10315	0.0789	NN	0.102	0.1053	0	0	0	0	1.3
255.764	255.771	2010-09-13 18:20:00	2010-09-13 18:29:59		-999		-999	288	0.247	0.039	0.267	0.0413	0.10095	0.0712	0.0403	0.1012	0.11145	0	0	0	0	0.8
255.771	255.778	2010-09-13 18:29:59	2010-09-13 18:40:00		-999		-999	270	0.272	0.037	0.287	0.06055	0.1026	0.0727	0.07805	0.09265	0.1073	0	0	0	0	1.1
255.778	255.785	2010-09-13 18:40:00	2010-09-13 18:49:59		-999		-999	266	0.293	0.036	0.306	0.06075	0.10445	0.0686	0.0716	0.08235	0.0984	0	0	0	0	2
255.785	255.792	2010-09-13 18:49:59	2010-09-13 19:00:00		-999		-999	273	0.314	0.036	0.324	0.0617	0.10205	0.0668	0.06765	0.07905	0.092	0	0	0	0	1.7
255.792	255.799	2010-09-13 19:00:00	2010-09-13 19:09:59		-999		-999	265	0.333	0.037	0.342	0.05945	0.09595	0.06335	0.0639	0.07735	0.08795	0	0	0	0	1.9
255.799	255.806	2010-09-13 19:09:59	2010-09-13 19:20:00		-999		-999	262	0.352	0.035	0.36	0.05705	0.0833	0.0603	0.061	0.07745	0.0847	0	0	0	0	2
255.806	255.812	2010-09-13 19:20:00	2010-09-13 19:30:00		-999		-999	256	0.37	0.032	0.377	0.05535	0.07135	0.05755	0.05895	0.06975	0.08125	0	0	0	0	2.2
255.812	255.819	2010-09-13 19:30:00	2010-09-13 19:39:59		-999		-999	271	0.386	0.034	0.393	0.05365	0.0588	0.0551	0.0569	0.064	0.0782	0	0	0	0	2.4
255.819	255.826	2010-09-13 19:39:59	2010-09-13 19:50:00		-999		-999	269	0.4	0.035	0.408	0.0556	0.0505	0.04635	0.05645	0.05655	0.07655	0	0	0	0	2.9
255.826	255.833	2010-09-13 19:50:00	2010-09-13 19:59:59		-999		-999	271	0.416	0.036	0.423	0.0586	0.0455	0.0388	0.05435	0.0437	0.05675	0	0	0	0	3
255.833	255.84	2010-09-13 19:59:59	2010-09-13 20:10:00		-999		-999	265	0.43	0.037	0.437	0.0623	0.04675	0.03195	0.0581	0.039	0.04845	0	0	0	0	3.5
255.84	255.847	2010-09-13 20:10:00	2010-09-13 20:19:59		-999		-999	265	0.446	0.036	0.453	0.0633	0.04925	0.0328	0.05395	0.03825	0.04655	0	0	0	0	3.5
255.847	255.854	2010-09-13 20:19:59	2010-09-13 20:30:00		-999		-999	262	0.459	0.037	0.466	0.0655	0.05255	0.0311	0.04125	0.04225	0.0439	0	0	0	0	3.8
255.854	255.861	2010-09-13 20:30:00	2010-09-13 20:39:59		-999		-999	252	0.471	0.037	0.478	0.0613	0.0509	0.02875	0.0583	0.0556	0.0435	0	0	0	0	3.8
255.861	255.868	2010-09-13 20:39:59	2010-09-13 20:50:00		-999		-999	252	0.482	0.034	0.49	0.0646	0.04875	0.03385	0.05805	0.05565	0.04365	0	0	0	0	3.3
255.868	255.875	2010-09-13 20:50:00	2010-09-13 21:00:00		-999		-999	258	0.493	0.034	0.5	0.06695	0.04695	0.0357	0.061	0.05565	0.04695	0	0	0	0	3.7
255.875	255.882	2010-09-13 21:00:00	2010-09-13 21:09:59		-999		-999	256	0.503	0.034	0.508	0.0734	0.04795	0.04215	0.06245	0.0549	0.04565	0	0	0	0	3.8
255.882	255.889	2010-09-13 21:09:59	2010-09-13 21:20:00		-999		-999	262	0.512	0.034	0.517	0.0813	0.04885	0.05195	0.06405	0.0532	0.0467	0	0	0	0	3.8
255.889	255.896	2010-09-13 21:20:00	2010-09-13 21:29:59		-999		-999	258	0.518	0.033	0.522	0.0915	0.0484	0.0666	0.0637	0.0548	0.04685	0	0	0	0	3.3
255.896	255.903	2010-09-13 21:29:59	2010-09-13 21:40:00		-999		-999	259	0.522	0.034	0.525	0.10185	0.0482	0.0777	0.064	0.05545	0.04685	0	0	0	0	2.6
255.903	255.91	2010-09-13 21:40:00	2010-09-13 21:49:59		-999		-999	263	0.527	0.034	0.53	0.1111	0.05085	0.0825	0.0652	0.05925	0.04635	0	0	0	0	2.4
255.91	255.917	2010-09-13 21:49:59	2010-09-13 22:00:00		-999		-999	261	0.532	0.034	0.534	0.125	0.0555	0.0893	0.07075	0.06805	0.04445	0	0	0	0	2
255.917	255.924	2010-09-13 22:00:00	2010-09-13 22:09:59		-999		-999	254	0.539	0.034	0.54	0.1402	0.06155	0.0967	0.0787	0.08285	0.04345	0	0	0	0	2
255.924	255.931	2010-09-13 22:09:59	2010-09-13 22:20:00		-999		-999	255	0.545	0.033	0.548	0.15405	0.06835	0.1015	0.0843	0.09035	0.04365	0	0	0	0	1.7
255.931	255.938	2010-09-13 22:20:00	2010-09-13 22:30:00		-999		-999	256	0.552	0.033	0.556	0.16755	0.0766	0.1064	0.09325	0.09515	0.0371	0	0	0	0	1.8
255.938	255.944	2010-09-13 22:30:00	2010-09-13 22:39:59		-999		-999	256	0.555	0.033	0.561	0.1827	0.0884	0.11045	0.088	0.09455	0.0365	0	0	0	0	1.9
255.944	255.951	2010-09-13 22:39:59	2010-09-13 22:50:00		-999		-999	248	0.559	0.033	0.565	0.201	0.1029	0.11455	0.1002	0.10975	0.0372	0	0	0	0	1.6
255.951	255.958	2010-09-13 22:50:00	2010-09-13 22:59:59		-999		-999	250	0.563	0.033	0.569	0.21975	0.1153	0.1208	0.10935	0.1136	0.0391	0	0	0	0	2.2
255.958	255.965	2010-09-13 22:59:59	2010-09-13 23:10:00		-999		-999	249	0.564	0.033	0.571	0.2349	0.1225	0.12805	0.1176	0.1196	0.04	0	0	0	0	1.8
255.965	255.972	2010-09-13 23:10:00	2010-09-13 23:19:59		-999		-999	247	0.566	0.033	0.573	0.2512	0.1281	0.13815	0.1318	0.12315	0.0498	0	0	0	0	1.9
255.972	255.979	2010-09-13 23:19:59	2010-09-13 23:30:00		-999		-999	250	0.569	0.032	0.574	0.2655	0.1325	0.14675	0.1455	0.1253	0.06055	0	0	0	0	2.3
255.979	255.986	2010-09-13 23:30:00	2010-09-13 23:39:59		-999		-999	243	0.574	0.03	0.577	0.2783	0.13485	0.15785	0.1585	0.12875	0.06825	0	0	0	0	2.6
255.986	255.993	2010-09-13 23:39:59	2010-09-13 23:50:00		-999		-999	244	0.578	0.03	0.58	0.2897	0.1355	0.17125	0.1694	0.12965	0.0786	0	0	0	0	2.7
255.993	256	2010-09-13 23:50:00	2010-09-14		-999		-999	246	0.585	0.028	0.585	0.2966	0.13395	0.1826	0.17975	0.1258	0.094	0	0	0	0	3.5
256	256.007	2010-09-14	2010-09-14 00:09:59		-999		-999	253	0.592	0.028	0.591	0.29945	0.13015	0.19345	0.18665	0.11645	0.1078	0	0	0	0	4.1
256.007	256.014	2010-09-14 00:09:59	2010-09-14 00:20:00		-999		-999	247	0.595	0.027	0.592	0.3013	0.12595	0.202	0.1983	0.1106	0.1228	0	0	0	0	4.6
256.014	256.021	2010-09-14 00:20:00	2010-09-14 00:29:59		-999		-999	249	0.6	0.026	0.594	0.30005	0.11925	0.20855	0.20385	0.10675	0.12975	0	0	0	0	4.9
256.021	256.028	2010-09-14 00:29:59	2010-09-14 00:40:00		-999		-999	253	0.602	0.026	0.595	0.29865	0.10985	0.2149	0.21	0.1033	0.13485	0	0	0	0	4.9
256.028	256.035	2010-09-14 00:40:00	2010-09-14 00:49:59		-999		-999	254	0.602	0.025	0.594	0.2949	0.0976	0.2188	0.2098	0.08905	0.14065	0	0	0	0	4.7
256.035	256.042	2010-09-14 00:49:59	2010-09-14 01:00:00		-999		-999	253	0.6	0.026	0.59	0.29115	0.08765	0.22065	0.2084	0.08525	0.142	0	0	0	0	4.6
256.042	256.049	2010-09-14 01:00:00	2010-09-14 01:09:59		-999		-999	251	0.595	0.026	0.586	0.28985	0.08415	0.22135	0.20705	0.07625	0.145	0	0	0	0	4.4
256.049	256.056	2010-09-14 01:09:59	2010-09-14 01:20:00		-999		-999	246	0.59	0.026	0.581	0.28855	0.09055	0.21745	0.20625	0.0713	0.1489	0	0	0	0	4.3
256.056	256.062	2010-09-14 01:20:00	2010-09-14 01:30:00		-999		-999	253	0.584	0.025	0.575	0.2847	0.0995	0.21005	0.19835	0.0754	0.14685	0	0	0	0	4.1
256.062	256.069	2010-09-14 01:30:00	2010-09-14 01:39:59		-999		-999	247	0.576	0.024	0.568	0.2793	0.10895	0.19965	0.19205	0.09075	0.14495	0	0	0	0	4.5
256.069	256.076	2010-09-14 01:39:59	2010-09-14 01:50:00		-999		-999	249	0.566	0.021	0.56	0.2736	0.11565	0.1886	0.1875	0.10485	0.1401	0	0	0	0	4.8
256.076	256.083	2010-09-14 01:50:00	2010-09-14 01:59:59		-999		-999	245	0.554	0.02	0.549	0.2679	0.1194	0.1779	0.19675	0.14065	0.13055	0	0	0	0	4.3
256.083	256.09	2010-09-14 01:59:59	2010-09-14 02:10:00		-999		-999	241	0.54	0.018	0.536	0.2644	0.1254	0.16425	0.2261	0.18835	0.11935	0	0	0	0	4.9
256.09	256.097	2010-09-14 02:10:00	2010-09-14 02:19:59		-999		-999	238	0.524	0.018	0.52	0.2608	0.12915	0.15265	0.2633	0.238	0.10385	0	0	0	0	5.5
256.097	256.104	2010-09-14 02:19:59	2010-09-14 02:30:00		-999		-999	234	0.505	0.018	0.501	0.25695	0.1325	0.1411	0.2902	0.2705	0.09525	0	0	0	0	6.1
256.104	256.111	2010-09-14 02:30:00	2010-09-14 02:39:59		-999		-999	237	0.49	0.018	0.485	0.2506	0.1343	0.129	0.31295	0.3028	0.08895	0	0	0	0	6.3
256.111	256.118	2010-09-14 02:39:59	2010-09-14 02:50:00		-999		-999	245	0.473	0.017	0.467	0.2418	0.13445	0.11775	0.3352	0.328	0.0789	0	0	0	0	7.6
256.118	256.125	2010-09-14 02:50:00	2010-09-14 03:00:00		-999		-999	245	0.457	0.017	0.45	0.22955	0.13225	0.1062	0.35715	0.3535	0.0737	0	0	0	0	7.7
256.125	256.132	2010-09-14 03:00:00	2010-09-14 03:09:59		-999		-999	245	0.442	0.017	0.434	0.21495	0.1281	0.09385	0.3918	0.3914	0.06715	0	0	0	0	7.2
256.132	256.139	2010-09-14 03:09:59	2010-09-14 03:20:00		-999		-999	242	0.425	0.017	0.417	0.19555	0.11765	0.0842	0.43875	0.44545	0.04975	0	0	0	0	6.6
256.139	256.146	2010-09-14 03:20:00	2010-09-14 03:29:59		-999		-999	245	0.407	0.017	0.399	0.1772	0.10545	0.07795	0.4863	0.4923	0.04305	0	0	0	0	7.3
256.146	256.153	2010-09-14 03:29:59	2010-09-14 03:40:00		-999		-999	241	0.387	0.017	0.378	0.15965	0.0933	0.0735	0.53105	0.53495	0.0378	0	0	0	0	6
256.153	256.16	2010-09-14 03:40:00	2010-09-14 03:49:59				-999	239	0.365	0.016	0.357	0.14195	0.08305	0.06645	0.5753	0.57725	0.03625	0	0	0	0	5.7
256.16	256.167	2010-09-14 03:49:59	2010-09-14 04:00:00				-999	239	0.338	0.016	0.329	0.1257	0.0777	0.0564	0.6104	0.6101	0.0364	0	0	0	0	6.1
256.167	256.174	2010-09-14 04:00:00	2010-09-14 04:09:59				-999	243	0.308	0.017	0.3	0.1075	0.0697	0.0486	0.6367	0.6375	0.03585	0	0	0	0	6.6
256.174	256.181	2010-09-14 04:09:59	2010-09-14 04:20:00				-999	239	0.279	0.018	0.272	0.0897	0.0632	0.0396	0.6586	0.6606	0.035	0	0	0	0	6
256.181	256.188	2010-09-14 04:20:00	2010-09-14 04:30:00				-999	246	0.246	0.02	0.241	0.07585	0.05725	0.03495	0.6873	0.6894	0.036	0	0	0	0	6.9
256.188	256.194	2010-09-14 04:30:00	2010-09-14 04:39:59				-999	247	0.217	0.022	0.213	0.0634	0.0521	0.03035	0.7145	0.7139	0.0348	0	0	0	0	7.1
256.194	256.201	2010-09-14 04:39:59	2010-09-14 04:50:00				-999	244	0.189	0.023	0.186	0.05355	0.0477	0.02825	0.74125	0.73945	0.03735	0	0	0	0	7
256.201	256.208	2010-09-14 04:50:00	2010-09-14 04:59:59				-999	239	0.167	0.023	0.166	0.04795	0.04675	0.0288	0.7663	0.7626	0.04025	0	0	0	0	7.2
256.208	256.215	2010-09-14 04:59:59	2010-09-14 05:10:00				-999	249	0.147	0.028	0.151	0.0416	0.0487	0.0265	0.7807	0.77455	0.04355	0	0	0	0	7.4
256.215	256.222	2010-09-14 05:10:00	2010-09-14 05:19:59				-999	237	0.126	0.032	0.133	0.03905	0.05525	0.02525	0.7868	0.7758	0.04885	0	0	0	0	8
256.222	256.229	2010-09-14 05:19:59	2010-09-14 05:30:00				-999	242	0.109	0.038	0.118	0.04295	0.064	0.0276	0.79455	0.7806	0.05545	0	0	0	0	8
256.229	256.236	2010-09-14 05:30:00	2010-09-14 05:39:59				-999	244	0.091	0.041	0.104	0.0479	0.06875	0.0275	0.8015	0.78465	0.06145	0	0	0	0	8.5
256.236	256.243	2010-09-14 05:39:59	2010-09-14 05:50:00				-999	244	0.076	0.045	0.095	0.05115	0.0744	0.0286	0.80415	0.7839	0.07005	0	0	0	0	8.8
256.243	256.25	2010-09-14 05:50:00	2010-09-14 06:00:00				-999	242	0.062	0.051	0.087	0.05205	0.07805	0.0305	0.80535	0.783	0.07485	0	0	0	0	9.3
256.25	256.257	2010-09-14 06:00:00	2010-09-14 06:09:59				-999	234	0.047	0.054	0.079	0.05325	0.0815	0.0323	0.80855	0.782	0.08325	0	0	0.2222	1	9.8
256.257	256.264	2010-09-14 06:09:59	2010-09-14 06:20:00				-999	244	0.034	0.056	0.075	0.05655	0.08405	0.03215	0.80915	0.77965	0.0883	0.1818	0.1818	0	1	10.3
256.264	256.271	2010-09-14 06:20:00	2010-09-14 06:29:59				-999	251	0.026	0.059	0.076	0.05995	0.08675	0.0316	0.8052	0.7725	0.094	0	0	0	1	9.8
256.271	256.278	2010-09-14 06:29:59	2010-09-14 06:40:00				-999	241	0.025	0.059	0.076	0.06255	0.09005	0.0318	0.80415	0.7682	0.10135	0	0	0.1818	1	10.4
256.278	256.285	2010-09-14 06:40:00	2010-09-14 06:49:59				-999	234	0.028	0.059	0.077	0.06405	0.09475	0.0353	0.80825	0.77035	0.1083	0	0	0	1	10.5
256.285	256.292	2010-09-14 06:49:59	2010-09-14 07:00:00				-999	240	0.029	0.059	0.077	0.06745	0.09815	0.03725	0.8144	0.77595	0.1118	0.2	0.2	0	1	11.1
256.292	256.299	2010-09-14 07:00:00	2010-09-14 07:09:59				-999	236	0.031	0.059	0.077	0.07165	0.1	0.0369	0.8196	0.7807	0.11345	0	0	0	1	11.2
256.299	256.306	2010-09-14 07:09:59	2010-09-14 07:20:00				-999	240	0.034	0.06	0.078	0.0732	0.1016	0.0367	0.8245	0.7862	0.11395	0.2222	0	0	1	10.6
256.306	256.312	2010-09-14 07:20:00	2010-09-14 07:30:00				-999	241	0.036	0.06	0.079	0.07165	0.1011	0.03825	0.82335	0.78385	0.11665	0	0	0.1818	1	11.1
256.312	256.319	2010-09-14 07:30:00	2010-09-14 07:39:59				-999	242	0.041	0.06	0.08	0.0715	0.09915	0.0382	0.82155	0.77965	0.12245	0	0.2222	0	1	11
256.319	256.326	2010-09-14 07:39:59	2010-09-14 07:50:00				-999	240	0.045	0.06	0.081	0.0683	0.09515	0.03745	0.82025	0.7739	0.13615	0.1818	0	0	1	11.3
256.326	256.333	2010-09-14 07:50:00	2010-09-14 07:59:59				-999	249	0.048	0.06	0.081	0.06655	0.0912	0.0357	0.8121	0.7587	0.15005	0	0	0.2222	1	9.9
256.333	256.34	2010-09-14 07:59:59	2010-09-14 08:10:00				-999	243	0.05	0.06	0.081	0.06515	0.0872	0.03405	0.8099	0.75255	0.1591	0	0	0	1	10.6
256.34	256.347	2010-09-14 08:10:00	2010-09-14 08:19:59				-999	246	0.052	0.06	0.08	0.06245	0.0842	0.034	0.80315	0.7426	0.16225	0	0	0	1	10
256.347	256.354	2010-09-14 08:19:59	2010-09-14 08:30:00				-999	241	0.056	0.06	0.081	0.05905	0.0805	0.03395	0.78845	0.71995	0.17975	0	0.2	0	1	10.6
256.354	256.361	2010-09-14 08:30:00	2010-09-14 08:39:59				-999	246	0.059	0.059	0.081	0.0564	0.1972	0.18535	0.7755	0.69665	0.2655	0.3636	0	0	1	8.9
256.361	256.368	2010-09-14 08:39:59	2010-09-14 08:50:00				-999	243	0.061	0.059	0.08	0.05475	0.27185	0.265	0.75695	0.6731	0.3444	0.2222	0	0.2222	1	9.4
256.368	256.375	2010-09-14 08:50:00	2010-09-14 09:00:00				-999	236	0.062	0.058	0.08	0.05025	0.2702	0.2646	0.73005	0.6428	0.3433	0.6	0.1818	0	1	9.7
256.375	256.382	2010-09-14 09:00:00	2010-09-14 09:09:59				-999	231	0.062	0.056	0.076	0.04275	0.26885	0.2645	0.7141	0.62295	0.34355	0	0.2222	0.2222	1	10.5
256.382	256.389	2010-09-14 09:09:59	2010-09-14 09:20:00				-999	231	0.063	0.054	0.074	0.03735	0.26705	0.2643	0.7002	0.6069	0.34295	0.1818	0	0	1	10.4
256.389	256.396	2010-09-14 09:20:00	2010-09-14 09:29:59				-999	246	0.063	0.05	0.072	0.035	0.2656	0.2639	0.69665	0.60245	0.34265	0	0	0	1	10.1
256.396	256.403	2010-09-14 09:29:59	2010-09-14 09:40:00				-999	236	0.064	0.048	0.07	0.029	0.2654	0.26395	0.69285	0.6004	0.34065	0.3636	0.1818	0	1	9.9
256.403	256.41	2010-09-14 09:40:00	2010-09-14 09:49:59				-999	245	0.064	0.043	0.064	0.0309	0.26615	0.26425	0.6897	0.60285	0.3348	0.2222	0	0	1	11.2
256.41	256.417	2010-09-14 09:49:59	2010-09-14 10:00:00				-999	235	0.065	0.036	0.059	0.0319	0.267	0.2646	0.7015	0.6254	0.32845	0.2	0	0	1	10.8
256.417	256.424	2010-09-14 10:00:00	2010-09-14 10:09:59				-999	230	0.065	0.033	0.057	0.03195	0.26725	0.2646	0.70875	0.6412	0.3225	0	0	0	1	11.6
256.424	256.431	2010-09-14 10:09:59	2010-09-14 10:20:00				-999	238	0.066	0.028	0.052	0.03315	0.26765	0.2647	0.72645	0.66615	0.3206	0	0	0	1	9.9
256.431	256.438	2010-09-14 10:20:00	2010-09-14 10:30:00				-999	221	0.066	0.023	0.048	0.03445	0.26805	0.2647	0.7532	0.70365	0.3114	0	0	0	1	9.7
256.438	256.444	2010-09-14 10:30:00	2010-09-14 10:39:59				-999	246	0.066	0.024	0.047	0.0345	0.1934	0.1872	0.7735	0.73625	0.23595	0	0	0.2222	1	9.5
256.444	256.451	2010-09-14 10:39:59	2010-09-14 10:50:00				-999	223	0.065	0.024	0.045	0.03425	0.05585	0.02835	0.7901	0.7546	0.1049	0	0.1818	0	1	8.9
256.451	256.458	2010-09-14 10:50:00	2010-09-14 10:59:59				-999	235	0.065	0.025	0.045	0.0337	0.0566	0.02955	0.81135	0.76805	0.1406	0	0	0	1	8.8
256.458	256.465	2010-09-14 10:59:59	2010-09-14 11:10:00	FCE1.1		FCE1.1	-999	231	0.065	0.026	0.045	0.0349	0.0567	0.03105	0.8256	0.77645	0.16475	0	0	0	1	9
256.465	256.472	2010-09-14 11:10:00	2010-09-14 11:19:59	FCE1.1		FCE1.1	-999	238	0.065	0.029	0.044	0.0411	0.0573	0.03285	0.83615	0.782	0.1802	0.2222	0	0	1	8.5
256.472	256.479	2010-09-14 11:19:59	2010-09-14 11:30:00	FCE1.1		FCE1.1	-999	234	0.065	0.03	0.042	0.0466	0.05845	0.0326	0.84185	0.78485	0.19005	0	0	0	1	8.5
256.479	256.486	2010-09-14 11:30:00	2010-09-14 11:39:59	FCE1.1		FCE1.1	-999	237	0.063	0.031	0.04	0.05365	0.0597	0.0322	0.8487	0.78965	0.198	0	0	0	1	8.8
256.486	256.493	2010-09-14 11:39:59	2010-09-14 11:50:00	FCE1.1		FCE1.1	-999	232	0.061	0.032	0.038	0.0578	0.05955	0.0298	0.85665	0.79655	0.2037	0.2222	0.2222	0.2222	1	7.5
256.493	256.5	2010-09-14 11:50:00	2010-09-14 12:00:00	FCE1.1		FCE1.1	0.1325	236	0.059	0.032	0.037	0.0613	0.05875	0.0261	0.8624	0.8001	0.21065	0.3636	0.1818	0	1	7.9
256.5	256.507	2010-09-14 12:00:00	2010-09-14 12:09:59	FCE1.1		FCE1.1	0.30034	237	0.057	0.033	0.036	0.0649	0.05965	0.02665	0.8646	0.79915	0.21715	0	0	0	1	8.7
256.507	256.514	2010-09-14 12:09:59	2010-09-14 12:20:00	FCE1.1		FCE1.1	0.2973	232	0.056	0.034	0.036	0.06505	0.0571	0.0275	0.86225	0.79315	0.2228	0.1818	0	0	1	8.1
256.514	256.521	2010-09-14 12:20:00	2010-09-14 12:29:59	FCE1.1		FCE1.1	0.33896	239	0.052	0.034	0.033	0.0645	0.0556	0.0277	0.85945	0.7871	0.22785	0	0	0	0	7.9
256.521	256.528	2010-09-14 12:29:59	2010-09-14 12:40:00	FCE1.1		FCE1.1	0.39997	239	0.05	0.034	0.031	0.06525	0.05675	0.02715	0.85755	0.78195	0.23275	0	0	0	0	7.3
256.528	256.535	2010-09-14 12:40:00	2010-09-14 12:49:59	FCE1.1		FCE1.1	0.4455	242	0.047	0.034	0.028	0.0671	0.0604	0.02715	0.86035	0.7841	0.23715	0	0	0	0	8
256.535	256.542	2010-09-14 12:49:59	2010-09-14 13:00:00	FCE1.1		FCE1.1	0.43629	232	0.045	0.035	0.024	0.0702	0.0651	0.02675	0.86115	0.78925	0.22665	0	0	0	0	7.9
256.542	256.549	2010-09-14 13:00:00	2010-09-14 13:09:59	FCE1.1		FCE1.1	0.47125	233	0.045	0.035	0.023	0.075	0.0762	0.0278	0.8616	0.79395	0.2161	0	0	0	0	7.8
256.549	256.556	2010-09-14 13:09:59	2010-09-14 13:20:00	FCE1.1		FCE1.1	0.44539	222	0.045	0.035	0.023	0.0758	0.08605	0.03045	0.86525	0.8009	0.2119	0	0	0	0	8.5
256.556	256.562	2010-09-14 13:20:00	2010-09-14 13:30:00	FCE1.1		FCE1.1	0.4472	222	0.046	0.036	0.022	0.07505	0.0918	0.03455	0.8698	0.80905	0.207	0	0	0	0	8.5
256.562	256.569	2010-09-14 13:30:00	2010-09-14 13:39:59	FCE1.1		FCE1.1	0.46071	240	0.046	0.036	0.022	0.0719	0.09575	0.0376	0.8731	0.81515	0.20275	0	0	0	0	8.5
256.569	256.576	2010-09-14 13:39:59	2010-09-14 13:50:00	FCE1.1		FCE1.1	0.422	237	0.046	0.036	0.021	0.07105	0.09735	0.03815	0.873	0.8159	0.20125	0	0	0	0	7.9
256.576	256.583	2010-09-14 13:50:00	2010-09-14 13:59:59	FCE1.1		FCE1.1	0.43838	238	0.045	0.037	0.019	0.06925	0.1	0.04085	0.8711	0.8154	0.1962	0	0	0	0	7.4
256.583	256.59	2010-09-14 13:59:59	2010-09-14 14:10:00	FCE1.1		FCE1.1	0.4424	238	0.045	0.038	0.017	0.06665	0.10265	0.04315	0.8709	0.8154	0.19535	0	0	0	0	7.4
256.59	256.597	2010-09-14 14:10:00	2010-09-14 14:19:59	FCE1.1		FCE1.1	0.44615	235	0.047	0.038	0.019	0.067	0.10535	0.04335	0.86965	0.81385	0.1947	0	0	0	0	7
256.597	256.604	2010-09-14 14:19:59	2010-09-14 14:30:00	FCE1.1		FCE1.1	0.42608	242	0.048	0.038	0.02	0.06765	0.1082	0.0456	0.8713	0.81775	0.19005	0	0	0	0	7.9
256.604	256.611	2010-09-14 14:30:00	2010-09-14 14:39:59	FCE1.1		FCE1.1	0.42443	233	0.048	0.038	0.02	0.06815	0.11035	0.04745	0.87485	0.8239	0.18595	0	0	0	0	8.2
256.611	256.618	2010-09-14 14:39:59	2010-09-14 14:50:00	FCE1.1		FCE1.1	0.41802	240	0.049	0.038	0.021	0.06755	0.11185	0.04955	0.8748	0.8274	0.17555	0	0	0	0	8.2
256.618	256.625	2010-09-14 14:50:00	2010-09-14 15:00:00	FCE1.1		FCE1.1	0.4067	239	0.05	0.037	0.023	0.06595	0.11265	0.0511	0.8771	0.83415	0.1651	0	0	0	0	8.1
256.625	256.632	2010-09-14 15:00:00	2010-09-14 15:09:59	FCE1.1		FCE1.1	0.40266	239	0.052	0.037	0.024	0.0617	0.11105	0.05435	0.87895	0.83895	0.15805	0	0	0	0	8.6
256.632	256.639	2010-09-14 15:09:59	2010-09-14 15:20:00	FCE1.1		FCE1.1	0.3611	231	0.053	0.035	0.027	0.0579	0.1071	0.05425	0.87815	0.84075	0.14825	0	0	0	0	8.1
256.639	256.646	2010-09-14 15:20:00	2010-09-14 15:29:59	FCE1.1		FCE1.1	0.36962	241	0.054	0.034	0.028	0.05485	0.10315	0.05405	0.875	0.83985	0.1398	0	0	0	0	9.2
256.646	256.653	2010-09-14 15:29:59	2010-09-14 15:40:00	FCE1.1		FCE1.1	0.35852	242	0.055	0.034	0.03	0.0524	0.09885	0.053	0.8662	0.8316	0.1335	0	0	0	0	8.5
256.653	256.66	2010-09-14 15:40:00	2010-09-14 15:49:59	FCE1.1		FCE1.1	0.16987	237	0.057	0.033	0.032	0.04835	0.096	0.0528	0.862	0.8306	0.12415	0	0	0	0	8.5
256.66	256.667	2010-09-14 15:49:59	2010-09-14 16:00:00	FCE1.1		FCE1.1	0.33837	245	0.058	0.033	0.032	0.0454	0.091	0.0512	0.86065	0.8314	0.1187	0	0	0	0	8.6
256.667	256.674	2010-09-14 16:00:00	2010-09-14 16:09:59	FCE1.1		FCE1.1	0.3424	237	0.06	0.033	0.033	0.0441	0.08815	0.0501	0.8582	0.83195	0.10735	0	0	0	0	9.3
256.674	256.681	2010-09-14 16:09:59	2010-09-14 16:20:00	FCE1.1		FCE1.1	0.31605	242	0.061	0.032	0.033	0.04405	0.0871	0.0495	0.8602	0.8387	0.09265	0	0	0	0	8.5
256.681	256.688	2010-09-14 16:20:00	2010-09-14 16:30:00	FCE1.1		FCE1.1	0.3146	230	0.062	0.031	0.033	0.0429	0.08525	0.04885	0.8568	0.83785	0.0823	0	0	0	0	8.9
256.688	256.694	2010-09-14 16:30:00	2010-09-14 16:39:59	FCE1.1		FCE1.1	0.30417	246	0.062	0.032	0.033	0.04165	0.0845	0.04965	0.8486	0.83085	0.07295	0	0	0	0	9.1
256.694	256.701	2010-09-14 16:39:59	2010-09-14 16:50:00	FCE1.1		FCE1.1	0.2895	232	0.063	0.032	0.034	0.042	0.0831	0.04815	0.83755	0.82035	0.06765	0	0	0	0	9.5
256.701	256.708	2010-09-14 16:50:00	2010-09-14 16:59:59	FCE1.1		FCE1.1	0.28171	241	0.064	0.032	0.034	0.04045	0.07965	0.04745	0.8208	0.8049	0.063	0	0	0	0	8.2
256.708	256.715	2010-09-14 16:59:59	2010-09-14 17:10:00	FCE1.1		FCE1.1	0.26756	240	0.065	0.033	0.035	0.04285	0.0758	0.0423	0.8085	0.79605	0.05185	0	0	0	0	7.8
256.715	256.722	2010-09-14 17:10:00	2010-09-14 17:19:59	FCE1.1		FCE1.1	0.26417	239	0.067	0.034	0.036	0.0465	0.07745	0.04065	0.7936	0.78295	0.04245	0	0	0	0	8.4
256.722	256.729	2010-09-14 17:19:59	2010-09-14 17:30:00	FCE1.1		FCE1.1	0.23353	236	0.069	0.034	0.037	0.0478	0.07845	0.0393	0.7842	0.77425	0.03905	0	0	0	0	8.6
256.729	256.736	2010-09-14 17:30:00	2010-09-14 17:39:59	FCE1.1		FCE1.1	0.23877	245	0.07	0.035	0.037	0.04755	0.0795	0.0403	0.78275	0.77625	0.03765	0	0	0	0	8.5
256.736	256.743	2010-09-14 17:39:59	2010-09-14 17:50:00	FCE1.1		FCE1.1	0.22235	227	0.071	0.036	0.038	0.05085	0.0813	0.0409	0.78025	0.7756	0.03825	0	0	0	0	8.7
256.743	256.75	2010-09-14 17:50:00	2010-09-14 18:00:00	FCE1.1		FCE1.1	0.22648	239	0.072	0.036	0.039	0.0598	0.08945	0.04145	0.77345	0.7722	0.0431	0	0	0	0	8.3
256.75	256.757	2010-09-14 18:00:00	2010-09-14 18:09:59	FCE1.1		FCE1.1	0.22379	228	0.073	0.036	0.039	0.06115	0.0928	0.0428	0.76885	0.77135	0.0481	0	0	0	0	9
256.757	256.764	2010-09-14 18:09:59	2010-09-14 18:20:00	FCE1.1		FCE1.1	0.2224	238	0.073	0.036	0.038	0.0614	0.09585	0.04535	0.75745	0.7625	0.0529	0	0	0	0	8.3
256.764	256.771	2010-09-14 18:20:00	2010-09-14 18:29:59	FCE1.1		FCE1.1	0.214	251	0.072	0.037	0.038	0.06325	0.10075	0.05545	0.74885	0.75775	0.059	0	0	0	0	8
256.771	256.778	2010-09-14 18:29:59	2010-09-14 18:40:00	FCE1.1		FCE1.1	0.18421	235	0.072	0.036	0.038	0.07335	0.10805	0.0535	0.75065	0.76185	0.05785	0	0	0	0	8.9
256.778	256.785	2010-09-14 18:40:00	2010-09-14 18:49:59	FCE1.1		FCE1.1	0.13912	234	0.071	0.037	0.037	0.08525	0.11775	0.05295	0.74985	0.76385	0.0577	0	0	0	0	8.9
256.785	256.792	2010-09-14 18:49:59	2010-09-14 19:00:00	FCE1.1		FCE1.1	0.15102	230	0.07	0.037	0.036	0.1004	0.12945	0.0516	0.7547	0.7692	0.0583	0	0	0	0	8.3
256.792	256.799	2010-09-14 19:00:00	2010-09-14 19:09:59	FCE1.1		FCE1.1	0.15208	230	0.07	0.037	0.035	0.10815	0.1395	0.0531	0.76005	0.775	0.05985	0	0.1818	0	1	8.2
256.799	256.806	2010-09-14 19:09:59	2010-09-14 19:20:00	FCE1.1		FCE1.1	0.15786	230	0.069	0.038	0.033	0.11365	0.1468	0.05435	0.76015	0.7792	0.0663	0	0	0	0	7.4
256.806	256.812	2010-09-14 19:20:00	2010-09-14 19:30:00	FCE1.1		FCE1.1	0.1554	231	0.069	0.037	0.032	0.11895	0.1516	0.05335	0.7561	0.77935	0.0727	0	0	0	0	8.4
256.812	256.819	2010-09-14 19:30:00	2010-09-14 19:39:59	FCE1.1		FCE1.1	0.16517	227	0.067	0.038	0.03	0.1224	0.15485	0.052	0.7496	0.7752	0.07495	0	0	0	0	8.2
256.819	256.826	2010-09-14 19:39:59	2010-09-14 19:50:00	FCE1.1		FCE1.1	0.1705	230	0.065	0.039	0.028	0.12185	0.1551	0.05175	0.75145	0.77915	0.0818	0	0	0	0	8.2
256.826	256.833	2010-09-14 19:50:00	2010-09-14 19:59:59	FCE1.1		FCE1.1	0.17725	225	0.064	0.038	0.028	0.11855	0.15185	0.0514	0.7426	0.77155	0.083	0	0	0	0	8.2
256.833	256.84	2010-09-14 19:59:59	2010-09-14 20:10:00	FCE1.1		FCE1.1	0.1785	241	0.063	0.038	0.027	0.11775	0.149	0.04925	0.72515	0.75765	0.08715	0	0	0	0	8.1
256.84	256.847	2010-09-14 20:10:00	2010-09-14 20:19:59	FCE1.1		FCE1.1	0.15115	238	0.063	0.038	0.027	0.1182	0.14755	0.0467	0.72175	0.75725	0.0948	0	0	0	0	8.4
256.847	256.854	2010-09-14 20:19:59	2010-09-14 20:30:00	FCE1.1		FCE1.1	0.18532	242	0.062	0.038	0.027	0.1186	0.1445	0.0322	0.72765	0.76365	0.1002	0	0	0	0	7.9
256.854	256.861	2010-09-14 20:30:00	2010-09-14 20:39:59	FCE1.1		FCE1.1	0.1928	243	0.061	0.038	0.026	0.1149	0.1396	0.0315	0.7268	0.76545	0.1058	0	0	0	0	8.1
256.861	256.868	2010-09-14 20:39:59	2010-09-14 20:50:00	FCE1.1		FCE1.1	0.20998	245	0.06	0.038	0.025	0.10595	0.13	0.03075	0.73045	0.7716	0.1114	0	0	0	0	7.2
256.868	256.875	2010-09-14 20:50:00	2010-09-14 21:00:00	FCE1.1		FCE1.1	0.19088	241	0.059	0.038	0.024	0.09115	0.1172	0.0304	0.7385	0.7816	0.11435	0	0	0	0	7.9
256.875	256.882	2010-09-14 21:00:00	2010-09-14 21:09:59	FCE1.1		FCE1.1	0.17341	246	0.057	0.038	0.023	0.07795	0.0998	0.0274	0.74655	0.79035	0.1173	0	0	0	0	7.4
256.882	256.889	2010-09-14 21:09:59	2010-09-14 21:20:00	FCE1.1		FCE1.1	0.161	240	0.054	0.037	0.022	0.06395	0.0793	0.0224	0.7606	0.80275	0.11815	0	0	0	0	7.6
256.889	256.896	2010-09-14 21:20:00	2010-09-14 21:29:59	FCE1.1		FCE1.1	0.13962	247	0.05	0.037	0.019	0.04965	0.0616	0.02055	0.76905	0.81015	0.11805	0	0	0	0	8.1
256.896	256.903	2010-09-14 21:29:59	2010-09-14 21:40:00	FCE1.1		FCE1.1	0.14847	238	0.047	0.037	0.019	0.0377	0.04545	0.0194	0.78015	0.82055	0.12005	0	0	0	0	8.4
256.903	256.91	2010-09-14 21:40:00	2010-09-14 21:49:59	FCE1.1		FCE1.1	0.15113	238	0.044	0.038	0.018	0.03255	0.0352	0.01765	0.7774	0.81925	0.12345	0	0	0	0	8.9
256.91	256.917	2010-09-14 21:49:59	2010-09-14 22:00:00	FCE1.1		FCE1.1	0.1177	244	0.043	0.039	0.015	0.0296	0.02605	0.01645	0.7816	0.82535	0.12895	0	0	0	0	8.8
256.917	256.924	2010-09-14 22:00:00	2010-09-14 22:09:59	FCE1.1		FCE1.1	0.13353	236	0.042	0.039	0.015	0.02825	0.0233	0.01625	0.79005	0.8351	0.1378	0	0	0	0	8.7
256.924	256.931	2010-09-14 22:09:59	2010-09-14 22:20:00	FCE1.1		FCE1.1	0.16635	231	0.042	0.039	0.014	0.0267	0.0216	0.01495	0.78515	0.83085	0.1386	0	0	0	0	8.7
256.931	256.938	2010-09-14 22:20:00	2010-09-14 22:30:00	FCE1.1		FCE1.1	0.16232	232	0.044	0.04	0.015	0.0268	0.02195	0.0128	0.7537	0.80155	0.14205	0	0	0	0	7.9
256.938	256.944	2010-09-14 22:30:00	2010-09-14 22:39:59	FCE1.1		FCE1.1	0.18054	229	0.045	0.04	0.017	0.0273	0.0253	0.0117	0.7398	0.79255	0.14925	0	0	0	0	7.5
256.944	256.951	2010-09-14 22:39:59	2010-09-14 22:50:00	FCE1.1		FCE1.1	0.2098	234	0.049	0.041	0.018	0.0269	0.0258	0.01165	0.72805	0.78435	0.15345	0	0	0	0	8
256.951	256.958	2010-09-14 22:50:00	2010-09-14 22:59:59	FCE1.1		FCE1.1	0.24379	243	0.054	0.041	0.022	0.02755	0.02885	0.01195	0.7111	0.7718	0.1573	0	0	0	0	7
256.958	256.965	2010-09-14 22:59:59	2010-09-14 23:10:00	FCE1.1		FCE1.1	0.22907	233	0.056	0.041	0.024	0.029	0.03075	0.0118	0.6918	0.7562	0.15775	0	0	0	0	8.1
256.965	256.972	2010-09-14 23:10:00	2010-09-14 23:19:59	FCE1.1		FCE1.1	0.21735	244	0.059	0.042	0.027	0.03385	0.03495	0.01155	0.6619	0.73525	0.1659	0	0	0.2222	1	8.3
256.972	256.979	2010-09-14 23:19:59	2010-09-14 23:30:00	FCE1.1		FCE1.1	0.20323	239	0.061	0.043	0.028	0.0337	0.0351	0.013	0.6458	0.726	0.17345	0	0	0	1	8
256.979	256.986	2010-09-14 23:30:00	2010-09-14 23:39:59	FCE1.1		FCE1.1	0.17145	244	0.063	0.043	0.029	0.03435	0.03525	0.0128	0.6221	0.7056	0.17355	0	0	0	1	7.8
256.986	256.993	2010-09-14 23:39:59	2010-09-14 23:50:00	FCE1.1		FCE1.1	0.1707	241	0.065	0.044	0.03	0.03405	0.03495	0.01305	0.5866	0.67295	0.17085	0	0.2222	0.4444	1	8.2
256.993	257	2010-09-14 23:50:00	2010-09-15	FCE1.1		FCE1.1	0.14995	236	0.067	0.045	0.03	0.03385	0.03465	0.0139	0.55035	0.6371	0.17055	0.1818	0.1818	0.3636	1	8.5
257	257.007	2010-09-15	2010-09-15 00:09:59	FCE1.1		FCE1.1	0.1345	231	0.068	0.046	0.03	0.03405	0.03445	0.0147	0.5122	0.5983	0.1654	0	0	0	1	8.6
257.007	257.014	2010-09-15 00:09:59	2010-09-15 00:20:00	FCE1.1		FCE1.1	0.1033	224	0.07	0.047	0.031	0.03575	0.0349	0.01525	0.4777	0.56515	0.16635	0	0	0	1	8.5
257.014	257.021	2010-09-15 00:20:00	2010-09-15 00:29:59	FCE1.1		FCE1.1	0.06971	236	0.071	0.047	0.031	0.0366	0.03555	0.01525	0.4718	0.5588	0.16625	0	0	0	1	8.4
257.021	257.028	2010-09-15 00:29:59	2010-09-15 00:40:00	FCE1.1		FCE1.1	0.17786	222	0.072	0.048	0.032	0.0368	0.0336	0.0159	0.43435	0.5195	0.1633	0	0.1818	0	1	7.6
257.028	257.035	2010-09-15 00:40:00	2010-09-15 00:49:59	FCE1.1		FCE1.1	0.16745	220	0.073	0.049	0.032	0.03725	0.03255	0.0169	0.39475	0.47875	0.16325	0	0	0	1	7.7
257.035	257.042	2010-09-15 00:49:59	2010-09-15 01:00:00	FCE1.1		FCE1.1	0.12349	225	0.075	0.051	0.032	0.03815	0.03145	0.0174	0.3535	0.436	0.16265	0	0	0.2	1	8
257.042	257.049	2010-09-15 01:00:00	2010-09-15 01:09:59	FCE1.1		FCE1.1	0.14348	224	0.076	0.052	0.032	0.0404	0.03215	0.01795	0.30025	0.39045	0.16635	0	0	0	0	7.8
257.049	257.056	2010-09-15 01:09:59	2010-09-15 01:20:00	FCE1.1		FCE1.1	0.14695	224	0.078	0.053	0.032	0.04075	0.0317	0.01815	0.27	0.35705	0.16075	0	0	0	0	7.8
257.056	257.062	2010-09-15 01:20:00	2010-09-15 01:30:00	FCE1.1		FCE1.1	0.13273	234	0.078	0.054	0.031	0.04305	0.0347	0.01745	0.24875	0.33465	0.15445	0	0	0	0	7.7
257.062	257.069	2010-09-15 01:30:00	2010-09-15 01:39:59	FCE1.1		FCE1.1	0.09066	233	0.079	0.054	0.031	0.0464	0.0375	0.0173	0.2454	0.3361	0.1562	0	0	0	0	7.9
257.069	257.076	2010-09-15 01:39:59	2010-09-15 01:50:00	FCE1.1		FCE1.1	0.0465	232	0.079	0.055	0.031	0.04915	0.03925	0.01775	0.3273	0.40255	0.16085	0	0	0	0	8.1
257.076	257.083	2010-09-15 01:50:00	2010-09-15 01:59:59			FCE1.1	0.00017	224	0.079	0.055	0.031	0.0526	0.04275	0.01665	0.40135	0.46865	0.16105	0	0	0	0	8.6
257.083	257.09	2010-09-15 01:59:59	2010-09-15 02:10:00				0.00128	222	0.078	0.054	0.032	0.05865	0.04885	0.01625	0.46725	0.52895	0.1625	0	0	0	0	8.5
257.09	257.097	2010-09-15 02:10:00	2010-09-15 02:19:59				-0.0009	228	0.077	0.054	0.032	0.0606	0.0519	0.0157	0.5274	0.58455	0.16365	0	0	0	0	9
257.097	257.104	2010-09-15 02:19:59	2010-09-15 02:30:00				-0.00164	229	0.075	0.054	0.032	0.06225	0.05335	0.01575	0.58315	0.63495	0.16095	0	0	0	0	8.4
257.104	257.111	2010-09-15 02:30:00	2010-09-15 02:39:59				0.00675	219	0.074	0.054	0.032	0.06305	0.05485	0.0151	0.6366	0.6836	0.1547	0	0	0	0	7.9
257.111	257.118	2010-09-15 02:39:59	2010-09-15 02:50:00				0.00228	233	0.072	0.054	0.031	0.06405	0.05595	0.01455	0.68365	0.72835	0.1491	0	0	0	0	8.3
257.118	257.125	2010-09-15 02:50:00	2010-09-15 03:00:00				0.00753	212	0.069	0.054	0.029	0.06375	0.05495	0.0147	0.7265	0.7711	0.1474	0	0	0	0	7.8
257.125	257.132	2010-09-15 03:00:00	2010-09-15 03:09:59	FCE1.2			0.05704	235	0.067	0.054	0.028	0.0617	0.05305	0.0153	0.7712	0.8128	0.14335	0	0	0	0	8
257.132	257.139	2010-09-15 03:09:59	2010-09-15 03:20:00	FCE1.2			0.0511	220	0.063	0.053	0.026	0.0595	0.0507	0.0176	0.81115	0.8505	0.1472	0.1818	0	0	1	9.1
257.139	257.146	2010-09-15 03:20:00	2010-09-15 03:29:59	FCE1.2			0.13375	228	0.06	0.053	0.025	0.0579	0.0483	0.0187	0.8372	0.87305	0.1468	0	0.2222	0.4444	1	8.6
257.146	257.153	2010-09-15 03:29:59	2010-09-15 03:40:00	FCE1.2			0.12407	231	0.057	0.053	0.025	0.05495	0.04605	0.01835	0.8604	0.89335	0.1481	0.1818	0	0	1	8.5
257.153	257.16	2010-09-15 03:40:00	2010-09-15 03:49:59	FCE1.2			0.1804	223	0.054	0.052	0.025	0.05245	0.04465	0.0182	0.86885	0.8997	0.1493	0	0.2222	0	1	8.7
257.16	257.167	2010-09-15 03:49:59	2010-09-15 04:00:00	FCE1.2			0.17634	222	0.05	0.052	0.025	0.0489	0.0417	0.0185	0.8767	0.9058	0.1495	0	0	0	0	9.2
257.167	257.174	2010-09-15 04:00:00	2010-09-15 04:09:59	FCE1.2			0.19225	233	0.047	0.051	0.025	0.0413	0.03465	0.0186	0.8798	0.90775	0.14725	0	0	0	0	9.5
257.174	257.181	2010-09-15 04:09:59	2010-09-15 04:20:00	FCE1.2			0.19615	227	0.044	0.051	0.026	0.0371	0.0305	0.0193	0.8834	0.90925	0.14025	0	0	0	0	9.4
257.181	257.188	2010-09-15 04:20:00	2010-09-15 04:30:00	FCE1.2			0.18465	228	0.041	0.05	0.025	0.03355	0.0298	0.01975	0.8871	0.91115	0.1351	0	0	0	0	9.3
257.188	257.194	2010-09-15 04:30:00	2010-09-15 04:39:59	FCE1.2			0.194	243	0.038	0.05	0.026	0.0336	0.0323	0.0199	0.8895	0.91235	0.1336	0	0	0	0	9.2
257.194	257.201	2010-09-15 04:39:59	2010-09-15 04:50:00	FCE1.2			0.1756	232	0.035	0.049	0.028	0.0317	0.0338	0.02045	0.8946	0.9158	0.1313	0.1818	0	0	1	9.7
257.201	257.208	2010-09-15 04:50:00	2010-09-15 04:59:59	FCE1.2			0.23079	231	0.03	0.049	0.029	0.02925	0.0353	0.0215	0.89515	0.91565	0.12885	0	0	0	1	9.4
257.208	257.215	2010-09-15 04:59:59	2010-09-15 05:10:00	FCE1.2			0.26101	233	0.026	0.048	0.03	0.0311	0.04165	0.0227	0.89745	0.9169	0.12575	0.1818	0	0.1818	1	10.2
257.215	257.222	2010-09-15 05:10:00	2010-09-15 05:19:59	FCE1.2			0.27545	244	0.023	0.047	0.032	0.0334	0.04595	0.022	0.89955	0.9173	0.11615	0	0	0	0	9.9
257.222	257.229	2010-09-15 05:19:59	2010-09-15 05:30:00	FCE1.2			0.27933	234	0.019	0.045	0.032	0.03435	0.04855	0.024	0.90155	0.9185	0.11195	0	0	0	0	10
257.229	257.236	2010-09-15 05:30:00	2010-09-15 05:39:59	FCE1.2			0.27167	238	0.016	0.045	0.033	0.03545	0.05075	0.0248	0.9031	0.91875	0.10425	0	0	0	0	10.5
257.236	257.243	2010-09-15 05:39:59	2010-09-15 05:50:00	FCE1.2			0.2736	231	0.014	0.044	0.033	0.0368	0.0532	0.0249	0.90295	0.91715	0.0917	0	0	0	0	10.3
257.243	257.25	2010-09-15 05:50:00	2010-09-15 06:00:00	FCE1.2			0.24172	231	0.018	0.047	0.033	0.03845	0.056	0.02465	0.90275	0.9156	0.08155	0	0	0	0	10.7
257.25	257.257	2010-09-15 06:00:00	2010-09-15 06:09:59	FCE1.2			0.21204	221	0.026	0.048	0.034	0.04025	0.0593	0.04095	0.90715	0.91755	0.0753	0	0	0	0	10.9
257.257	257.264	2010-09-15 06:09:59	2010-09-15 06:20:00	FCE1.2	1		0.2188	232	0.031	0.048	0.034	0.02105	0.03115	0.05775	0.4542	0.4591	0.09415	0	0	0.1818	1	10.6
257.264	257.271	2010-09-15 06:20:00	2010-09-15 06:29:59		1		0.22979	239	0.036	0.049	0.034	-999	-999	0.0576	-999	-999	0.1518	0	0	0	1	10.3
257.271	257.278	2010-09-15 06:29:59	2010-09-15 06:40:00		1		0.23627	243	0.037	0.049	0.034	-999	-999	0.05835	-999	-999	0.22115	0	0	0	1	10.2
257.278	257.285	2010-09-15 06:40:00	2010-09-15 06:49:59		1		0.22947	223	0.04	0.048	0.035	-999	-999	0.0586	-999	-999	0.27125	0	0.2222	0	1	9.5
257.285	257.292	2010-09-15 06:49:59	2010-09-15 07:00:00		1		0.23615	236	0.045	0.047	0.037	-999	-999	0.05945	-999	-999	0.317	0.6	0.2	0.2	1	9.9
257.292	257.299	2010-09-15 07:00:00	2010-09-15 07:09:59		1		0.25865	311	0.052	0.048	0.042	-999	-999	0.07475	-999	-999	0.3352	0.1818	0	0.5455	1	4.2
257.299	257.306	2010-09-15 07:09:59	2010-09-15 07:20:00		1		0.26609	-999	0.057	0.047	0.045	-999	-999	0.1158	-999	-999	0.34515	1.3333	-999	0.6667	1	0
257.306	257.312	2010-09-15 07:20:00	2010-09-15 07:30:00		1		0.25388	-999	0.06	0.046	0.049	-999	-999	0.12215	-999	-999	0.3514	0.7273	-999	0.9091	1	0
257.312	257.319	2010-09-15 07:30:00	2010-09-15 07:39:59		1		0	-999	0.064	0.045	0.053	-999	-999	0.1295	-999	-999	0.3549	0	-999	0.6667	1	0
257.319	257.326	2010-09-15 07:39:59	2010-09-15 07:50:00		1		0	-999	0.065	0.045	0.055	-999	-999	0.13095	-999	-999	0.3558	2.3636	-999	0.7273	1	0
257.326	257.333	2010-09-15 07:50:00	2010-09-15 07:59:59		1		0	-999	0.067	0.044	0.057	-999	-999	0.13305	-999	-999	0.3557	1.3333	-999	0.4444	1	0
257.333	257.34	2010-09-15 07:59:59	2010-09-15 08:10:00		1		0	286	0.069	0.043	0.058	-999	-999	0.1704	-999	-999	0.3549	0.3636	0.3636	0.1818	1	6.6
257.34	257.347	2010-09-15 08:10:00	2010-09-15 08:19:59		1		0	287	0.071	0.042	0.06	-999	-999	0.2189	-999	-999	0.35105	0.2222	0	0.2222	1	6.8
257.347	257.354	2010-09-15 08:19:59	2010-09-15 08:30:00		1		0	282	0.073	0.042	0.06	-999	-999	0.24785	-999	-999	0.33175	0	0.2	0	1	8.7
257.354	257.361	2010-09-15 08:30:00	2010-09-15 08:39:59		1		0	276	0.074	0.042	0.06	-999	-999	0.2613	-999	-999	0.2906	0.1818	0	0	1	7.8
257.361	257.368	2010-09-15 08:39:59	2010-09-15 08:50:00		1		0	275	0.074	0.041	0.059	-999	-999	0.263	-999	-999	0.24445	-999	0.2222	0.2222	1	7.6
257.368	257.375	2010-09-15 08:50:00	2010-09-15 09:00:00		1		0	278	0.075	0.04	0.058	-999	-999	0.26625	-999	-999	0.1842	0	0	0	1	8
257.375	257.382	2010-09-15 09:00:00	2010-09-15 09:09:59		1		0	267	0.076	0.04	0.058	-999	-999	0.2695	-999	-999	0.15595	0.5	0	0	1	8
257.382	257.389	2010-09-15 09:09:59	2010-09-15 09:20:00		1		0	264	0.077	0.04	0.057	-999	-999	0.26055	-999	-999	0.13295	0	0	0	0	7.1
257.389	257.396	2010-09-15 09:20:00	2010-09-15 09:29:59		1		0	262	0.079	0.04	0.057	-999	-999	0.26285	-999	-999	0.11655	0	0	0	0	5.8
257.396	257.403	2010-09-15 09:29:59	2010-09-15 09:40:00		1		0	263	0.079	0.04	0.057	-999	-999	0.2669	-999	-999	0.1057	0	0	0	0	5.6
257.403	257.41	2010-09-15 09:40:00	2010-09-15 09:49:59		1		0	257	0.08	0.04	0.057	-999	-999	0.2707	-999	-999	0.1095	0	0	0	0	4.5
257.41	257.417	2010-09-15 09:49:59	2010-09-15 10:00:00		1		0	257	0.08	0.036	0.057	-999	-999	0.27295	-999	-999	0.11445	0	0	0	0	5.1
257.417	257.424	2010-09-15 10:00:00	2010-09-15 10:09:59		1		0	262	0.078	0.034	0.057	-999	-999	0.24965	-999	-999	0.12095	0	0	0	0	4.5
257.424	257.431	2010-09-15 10:09:59	2010-09-15 10:20:00		1		0.0449	258	0.077	0.034	0.056	-999	-999	0.2117	-999	-999	0.1172	0	0	0	0	4
257.431	257.438	2010-09-15 10:20:00	2010-09-15 10:30:00				0.09523	231	0.075	0.032	0.056	0.1117	0.07995	0.1795	0.31575	0.3753	0.11915	0	0	0	0	4.9
257.438	257.444	2010-09-15 10:30:00	2010-09-15 10:39:59				0.04534	244	0.075	0.033	0.056	0.10475	0.08155	0.1633	0.30245	0.35905	0.12185	0	0	0	0	5.5
257.444	257.451	2010-09-15 10:39:59	2010-09-15 10:50:00				0.0731	249	0.074	0.037	0.055	0.0999	0.07975	0.16175	0.30565	0.36175	0.124	0	0	0	0	4.7
257.451	257.458	2010-09-15 10:50:00	2010-09-15 10:59:59				0.09617	235	0.073	0.04	0.053	0.09625	0.0805	0.15925	0.30135	0.36365	0.1271	0	0	0	0	5
257.458	257.465	2010-09-15 10:59:59	2010-09-15 11:10:00				0.09618	234	0.069	0.043	0.05	0.0918	0.0842	0.14935	0.28765	0.34905	0.1204	0	0	0	0	6.2
257.465	257.472	2010-09-15 11:10:00	2010-09-15 11:19:59				0.08665	232	0.067	0.046	0.047	0.08855	0.0872	0.1451	0.27835	0.33635	0.1195	0	0	0	0	6.5
257.472	257.479	2010-09-15 11:19:59	2010-09-15 11:30:00				0.06934	229	0.065	0.048	0.043	0.07775	0.0921	0.1383	0.26565	0.31955	0.1176	0	0	0	0	6.4
257.479	257.486	2010-09-15 11:30:00	2010-09-15 11:39:59				0.07225	227	0.061	0.048	0.037	0.0561	0.0956	0.12565	0.25415	0.312	0.1348	0	0	0	0	6.7
257.486	257.493	2010-09-15 11:39:59	2010-09-15 11:50:00				0.0363	233	0.061	0.048	0.032	0.05245	0.09345	0.1159	0.24915	0.31015	0.12765	0	0	0	0	6.5
257.493	257.5	2010-09-15 11:50:00	2010-09-15 12:00:00				0.04517	234	0.059	0.049	0.029	0.0427	0.09565	0.11045	0.24095	0.2989	0.1221	0	0	0	0	5.3
257.5	257.507	2010-09-15 12:00:00	2010-09-15 12:09:59				0.03071	218	0.058	0.051	0.025	0.0395	0.09325	0.10505	0.2043	0.25525	0.11505	0	0	0	0	5.6
257.507	257.514	2010-09-15 12:09:59	2010-09-15 12:20:00	NCE0.1			0.002	224	0.055	0.052	0.021	0.03975	0.09055	0.0985	0.1716	0.221	0.1137	0	0	0	0	5.1
257.514	257.521	2010-09-15 12:20:00	2010-09-15 12:29:59	NCE0.1			-0.00054	249	0.053	0.052	0.02	0.03945	0.0877	0.0931	0.15315	0.19055	0.10475	0	0	0	0	4.6
257.521	257.528	2010-09-15 12:29:59	2010-09-15 12:40:00	NCE0.1			0.00301	224	0.053	0.053	0.019	0.04125	0.08435	0.09045	0.14235	0.1791	0.10035	0	0	0	0	5.7
257.528	257.535	2010-09-15 12:40:00	2010-09-15 12:49:59	NCE0.1			0.00065	222	0.054	0.054	0.019	0.04015	0.084	0.09025	0.10685	0.14235	0.0962	0	0	0	0	6.7
257.535	257.542	2010-09-15 12:49:59	2010-09-15 13:00:00	NCE0.1			-0.00137	221	0.054	0.055	0.019	0.0384	0.0809	0.08515	0.07725	0.0916	0.0834	0	0	0	0	6.9
257.542	257.549	2010-09-15 13:00:00	2010-09-15 13:09:59	NCE0.1			-0.00465	213	0.053	0.055	0.019	0.0388	0.07445	0.079	0.07735	0.0822	0.08135	0	0	0	0	7.9
257.549	257.556	2010-09-15 13:09:59	2010-09-15 13:20:00	NCE0.1			0.00309	225	0.052	0.056	0.018	0.0394	0.06705	0.0678	0.06695	0.0757	0.0813	0	0	0	0	8.3
257.556	257.562	2010-09-15 13:20:00	2010-09-15 13:30:00	NCE0.1			0.00065	224	0.05	0.056	0.017	0.03845	0.0612	0.06505	0.05895	0.07015	0.08085	0	0	0	0	9
257.562	257.569	2010-09-15 13:30:00	2010-09-15 13:39:59	NCE0.1			-0.00062	230	0.049	0.056	0.016	0.03915	0.0572	0.06545	0.0474	0.05225	0.04245	0	0	0	0	7.7
257.569	257.576	2010-09-15 13:39:59	2010-09-15 13:50:00	NCE0.1			0.0023	225	0.049	0.057	0.017	0.0382	0.0553	0.06725	0.0423	0.04815	0.0425	0	0	0	0	8.2
257.576	257.583	2010-09-15 13:50:00	2010-09-15 13:59:59	NCE0.1			-0.00025	232	0.048	0.058	0.017	0.03855	0.0526	0.0649	0.04135	0.04745	0.04365	0	0	0	0	7.5
257.583	257.59	2010-09-15 13:59:59	2010-09-15 14:10:00	NCE0.1			-0.00111	234	0.048	0.058	0.017	0.0378	0.0533	0.0648	0.03795	0.0431	0.04335	0	0	0	0	7.9
257.59	257.597	2010-09-15 14:10:00	2010-09-15 14:19:59	NCE0.1			-0.0006	233	0.047	0.058	0.017	0.03405	0.05535	0.0659	0.04005	0.04365	0.04255	0	0	0	0	8
257.597	257.604	2010-09-15 14:19:59	2010-09-15 14:30:00	NCE0.1			-9e-05	250	0.046	0.058	0.017	0.03495	0.05615	0.0707	0.0389	0.04295	0.0436	0	0	0	0	7.7
257.604	257.611	2010-09-15 14:30:00	2010-09-15 14:39:59	NCE0.1			-0.0003	232	0.045	0.057	0.018	0.03535	0.057	0.07285	0.03955	0.04435	0.04535	0	0	0	0	8.4
257.611	257.618	2010-09-15 14:39:59	2010-09-15 14:50:00	NCE0.1			0.01077	227	0.044	0.055	0.017	0.0365	0.05545	0.07345	0.0398	0.0461	0.0471	0	0	0	0	8.2
257.618	257.625	2010-09-15 14:50:00	2010-09-15 15:00:00	NCE0.1			0.0003	227	0.042	0.054	0.017	0.037	0.05885	0.0752	0.03855	0.0462	0.047	0	0	0	0	9.4
257.625	257.632	2010-09-15 15:00:00	2010-09-15 15:09:59	NCE0.1			0.00788	225	0.04	0.051	0.016	0.0368	0.06085	0.07715	0.0368	0.0474	0.0425	0	0	0	0	8.9
257.632	257.639	2010-09-15 15:09:59	2010-09-15 15:20:00	NCE0.1			0.0015	225	0.038	0.049	0.016	0.03485	0.06345	0.0796	0.03495	0.04145	0.0362	0	0	0	0	9
257.639	257.646	2010-09-15 15:20:00	2010-09-15 15:29:59	NCE0.1			0.00771	232	0.036	0.048	0.018	0.035	0.06265	0.07835	0.03575	0.04045	0.03505	0	0	0	0	8.5
257.646	257.653	2010-09-15 15:29:59	2010-09-15 15:40:00	NCE0.1			-0.00109	229	0.036	0.05	0.018	0.1504	0.06035	0.1671	0.0368	0.0435	0.0379	0	0	0	0	7.5
257.653	257.66	2010-09-15 15:40:00	2010-09-15 15:49:59	NCE0.1			0.00022	236	0.035	0.05	0.018	0.15055	0.0642	0.1697	0.03655	0.04305	0.04015	0	0	0	0	8.2
257.66	257.667	2010-09-15 15:49:59	2010-09-15 16:00:00	NCE0.1			0.00588	224	0.035	0.05	0.018	0.1506	0.0649	0.1714	0.04615	0.048	0.04095	0	0	0	0	8.2
257.667	257.674	2010-09-15 16:00:00	2010-09-15 16:09:59	NCE0.1			-0.00175	221	0.034	0.048	0.017	0.15375	0.06295	0.1762	0.0457	0.0481	0.04045	0	0	0	0	9.2
257.674	257.681	2010-09-15 16:09:59	2010-09-15 16:20:00	NCE0.1			-0.00555	241	0.034	0.048	0.016	0.15555	0.0609	0.179	0.044	0.05415	0.04295	0	0	0	0	7.1
257.681	257.688	2010-09-15 16:20:00	2010-09-15 16:30:00	NCE0.1			-0.0014	241	0.034	0.048	0.017	0.15525	0.06225	0.18365	0.04525	0.05555	0.0426	0	0	0	0	6.1
257.688	257.694	2010-09-15 16:30:00	2010-09-15 16:39:59	NCE0.1			0.00604	231	0.032	0.047	0.018	0.15465	0.0633	0.18995	0.04585	0.0564	0.0414	0	0	0	0	6.7
257.694	257.701	2010-09-15 16:39:59	2010-09-15 16:50:00	NCE0.1			-0.0014	240	0.03	0.046	0.019	0.1546	0.0655	0.19315	0.04665	0.05775	0.04915	0	0	0	0	7.3
257.701	257.708	2010-09-15 16:50:00	2010-09-15 16:59:59	NCE0.1			0.00204	240	0.028	0.045	0.019	0.1553	0.06465	0.1992	0.04945	0.0608	0.05625	0	0	0	0	6.7
257.708	257.715	2010-09-15 16:59:59	2010-09-15 17:10:00	NCE0.1			0.00106	235	0.027	0.044	0.019	0.1555	0.0629	0.19945	0.04725	0.0669	0.0634	0	0	0	0	6.3
257.715	257.722	2010-09-15 17:10:00	2010-09-15 17:19:59	NCE0.1			-0.00237	244	0.026	0.043	0.02	0.1554	0.0327	0.1002	0.04655	0.0354	0.0337	0	0	0	0	6.2
257.722	257.729	2010-09-15 17:19:59	2010-09-15 17:30:00	NCE0.1			0.00195	230	0.024	0.043	0.021	0.15525	-999	-999	0.04555	-999	-999	0	0	0	0	7
257.729	257.736	2010-09-15 17:30:00	2010-09-15 17:39:59	NCE0.1			-0.00013	234	0.024	0.042	0.021	0.0527	0.0324	0.0561	0.046	0.03665	0.0355	0	0	0	0	8
257.736	257.743	2010-09-15 17:39:59	2010-09-15 17:50:00	NCE0.1			-0.00528	229	0.023	0.041	0.022	0.05355	0.03065	0.05485	0.0473	0.03685	0.03645	0	0	0	0	7.8
257.743	257.75	2010-09-15 17:50:00	2010-09-15 18:00:00	NCE0.1			-0.0003	234	0.022	0.04	0.022	0.054	0.06165	0.10955	0.03525	0.07085	0.07255	0	0	0	0	6.2
257.75	257.757	2010-09-15 18:00:00	2010-09-15 18:09:59	NCE0.1			0.00129	238	0.021	0.039	0.021	0.0443	0.064	0.0992	0.03435	0.07055	0.07255	0	0	0	0	6.7
257.757	257.764	2010-09-15 18:09:59	2010-09-15 18:20:00	NCE0.1			0.0012	238	0.021	0.039	0.022	0.04025	0.06505	0.0925	0.03325	0.0637	0.07045	0	0	0	0	7.2
257.764	257.771	2010-09-15 18:20:00	2010-09-15 18:29:59	NCE0.1			0.00029	237	0.02	0.039	0.022	0.0429	0.06575	0.08685	0.03165	0.0616	0.06845	0	0	0	0	7.6
257.771	257.778	2010-09-15 18:29:59	2010-09-15 18:40:00	NCE0.1			0.00018	241	0.02	0.038	0.022	0.04395	0.06525	0.0828	0.03015	0.0596	0.0669	0	0	0	0	6.8
257.778	257.785	2010-09-15 18:40:00	2010-09-15 18:49:59	NCE0.1			0.02153	231	0.019	0.037	0.021	0.0444	0.06725	0.0761	0.0325	0.05795	0.0616	0	0	0	0	7.1
257.785	257.792	2010-09-15 18:49:59	2010-09-15 19:00:00	NCE0.1			0.00558	241	0.019	0.036	0.021	0.0413	0.06995	0.07055	0.02895	0.0556	0.05615	0	0	0	0	7
257.792	257.799	2010-09-15 19:00:00	2010-09-15 19:09:59	NCE0.1			0.00045	247	0.017	0.035	0.022	0.0412	0.07505	0.0711	0.03115	0.04805	0.05115	0	0	0	0	7.1
257.799	257.806	2010-09-15 19:09:59	2010-09-15 19:20:00	NCE0.1			0.00238	233	0.017	0.035	0.022	0.0419	0.0742	0.06835	0.0344	0.04115	0.0483	0	0	0	0	6.6
257.806	257.812	2010-09-15 19:20:00	2010-09-15 19:30:00	NCE0.1			0.00185	234	0.017	0.033	0.02	0.0425	0.0752	0.0672	0.0344	0.03785	0.0472	0	0	0	0	7
257.812	257.819	2010-09-15 19:30:00	2010-09-15 19:39:59	NCE0.1			0	241	0.014	0.03	0.02	0.04175	0.0783	0.06795	0.03325	0.03495	0.0453	0	0	0	0	7.1
257.819	257.826	2010-09-15 19:39:59	2010-09-15 19:50:00	NCE0.1			0.0003	243	0.014	0.03	0.02	0.04125	0.0811	0.06825	0.033	0.0351	0.048	0	0	0	0	7.2
257.826	257.833	2010-09-15 19:50:00	2010-09-15 19:59:59	NCE0.1			0.00038	247	0.014	0.03	0.02	0.04125	0.0827	0.06355	0.0348	0.0341	0.0455	0	0	0	0	6.8
257.833	257.84	2010-09-15 19:59:59	2010-09-15 20:10:00	NCE0.1			-0.00243	233	0.013	0.029	0.019	0.04225	0.0838	0.0574	0.0358	0.0339	0.04685	0	0	0	0	6.6
257.84	257.847	2010-09-15 20:10:00	2010-09-15 20:19:59	NCE0.1			0.00795	231	0.012	0.028	0.019	0.0418	0.0856	0.0526	0.0376	0.03485	0.0507	0	0	0	0	7.2
257.847	257.854	2010-09-15 20:19:59	2010-09-15 20:30:00	NCE0.1			0.0008	232	0.012	0.027	0.019	0.0399	0.0874	0.055	0.0443	0.0371	0.0608	0	0	0	0	7.2
257.854	257.861	2010-09-15 20:30:00	2010-09-15 20:39:59	NCE0.1			-0.00165	223	0.014	0.026	0.017	0.0395	0.0909	0.05885	0.04855	0.04205	0.0657	0	0	0	0	7.7
257.861	257.868	2010-09-15 20:39:59	2010-09-15 20:50:00	NCE0.1			0.00687	231	0.015	0.027	0.017	0.0377	0.09395	0.06635	0.0504	0.0418	0.0647	0	0	0	0	7.5
257.868	257.875	2010-09-15 20:50:00	2010-09-15 21:00:00	NCE0.1			0.01355	241	0.015	0.026	0.016	0.03735	0.0965	0.0694	0.04965	0.04165	0.0679	0	0	0	0	7.6
257.875	257.882	2010-09-15 21:00:00	2010-09-15 21:09:59	NCE0.1			0.00071	225	0.016	0.025	0.016	0.03705	0.09745	0.07115	0.0492	0.0426	0.0677	0	0	0	0	7.4
257.882	257.889	2010-09-15 21:09:59	2010-09-15 21:20:00	NCE0.1			0.0039	230	0.016	0.025	0.015	0.03645	0.09875	0.0745	0.04945	0.04415	0.07025	0	0	0	0	8.7
257.889	257.896	2010-09-15 21:20:00	2010-09-15 21:29:59	NCE0.1			-0.00159	246	0.016	0.023	0.014	0.03615	0.10085	0.0776	0.0545	0.04675	0.08015	0	0	0	0	7.7
257.896	257.903	2010-09-15 21:29:59	2010-09-15 21:40:00	NCE0.1			0.00443	235	0.016	0.022	0.013	0.0362	0.09905	0.0772	0.06445	0.049	0.0924	0	0	0	0	7.4
257.903	257.91	2010-09-15 21:40:00	2010-09-15 21:49:59	NCE0.1			0.00352	231	0.016	0.021	0.011	0.03635	0.09755	0.07945	0.06725	0.0515	0.09895	0	0	0	0	8.1
257.91	257.917	2010-09-15 21:49:59	2010-09-15 22:00:00	NCE0.1			0.00077	241	0.016	0.021	0.011	0.03725	0.09635	0.08525	0.06875	0.05135	0.1032	0	0	0	0	8.1
257.917	257.924	2010-09-15 22:00:00	2010-09-15 22:09:59	NCE0.1			-0.00285	249	0.016	0.021	0.011	0.03415	0.09575	0.09035	0.0824	0.10105	0.11225	0	0	0	0	7.7
257.924	257.931	2010-09-15 22:09:59	2010-09-15 22:20:00				0.00521	243	0.016	0.02	0.011	0.0318	0.0955	0.0956	0.1527	0.18595	0.11695	0	0	0	0	7.3
257.931	257.938	2010-09-15 22:20:00	2010-09-15 22:30:00				0.00075	242	0.016	0.021	0.012	0.0316	0.09535	0.10145	0.2208	0.26005	0.11635	0	0	0	0	8
257.938	257.944	2010-09-15 22:30:00	2010-09-15 22:39:59				0.00279	243	0.016	0.021	0.013	0.0316	0.09355	0.1044	0.30025	0.3417	0.12115	0	0	0	0	8.1
257.944	257.951	2010-09-15 22:39:59	2010-09-15 22:50:00				0.0006	229	0.016	0.02	0.014	0.03115	0.08925	0.10205	0.3889	0.4283	0.1292	0	0	0	0	7
257.951	257.958	2010-09-15 22:50:00	2010-09-15 22:59:59				0.02416	241	0.016	0.02	0.013	0.02985	0.08465	0.10055	0.4681	0.50555	0.1375	0	0	0	0	7.1
257.958	257.965	2010-09-15 22:59:59	2010-09-15 23:10:00	FCE2.1			0.07625	241	0.017	0.02	0.013	0.0296	0.08085	0.09955	0.5345	0.56995	0.13975	0	0	0	0	7
257.965	257.972	2010-09-15 23:10:00	2010-09-15 23:19:59	FCE2.1			0.11548	235	0.017	0.02	0.013	0.02975	0.0789	0.09755	0.59645	0.6292	0.13855	0	0	0	0	7.6
257.972	257.979	2010-09-15 23:19:59	2010-09-15 23:30:00	FCE2.1			0.14941	238	0.017	0.019	0.015	0.03105	0.07615	0.0952	0.6543	0.6848	0.133	0	0	0	0	7.8
257.979	257.986	2010-09-15 23:30:00	2010-09-15 23:39:59	FCE2.1			0.1957	235	0.016	0.019	0.015	0.03055	0.07475	0.0939	0.7008	0.72995	0.12465	0	0	0	0	8.2
257.986	257.993	2010-09-15 23:39:59	2010-09-15 23:50:00	FCE2.1			0.2128	244	0.017	0.018	0.016	0.02945	0.0754	0.09275	0.7474	0.77485	0.118	0	0	0	0	8.1
257.993	258	2010-09-15 23:50:00	2010-09-16	FCE2.1			0.22913	244	0.018	0.018	0.016	0.0267	0.0753	0.0872	0.78775	0.81385	0.11445	0	0	0	0	8.6
258	258.007	2010-09-16	2010-09-16 00:09:59	FCE2.1			0.22587	238	0.018	0.018	0.016	0.02665	0.07745	0.0865	0.8209	0.8431	0.1056	0	0	0	0	7.6
258.007	258.014	2010-09-16 00:09:59	2010-09-16 00:20:00	FCE2.1			0.2416	239	0.017	0.017	0.016	0.02665	0.0756	0.08265	0.8339	0.85185	0.09845	0	0	0	0	8.8
258.014	258.021	2010-09-16 00:20:00	2010-09-16 00:29:59	FCE2.1			0.23267	237	0.017	0.018	0.017	0.0268	0.07415	0.0794	0.8395	0.852	0.09395	0	0	0	0	9.3
258.021	258.028	2010-09-16 00:29:59	2010-09-16 00:40:00	FCE2.1			0.22815	238	0.016	0.018	0.018	0.0272	0.07475	0.07965	0.84425	0.8509	0.08455	0	0	0	0	9.2
258.028	258.035	2010-09-16 00:40:00	2010-09-16 00:49:59	FCE2.1			0.22755	241	0.015	0.017	0.018	0.0262	0.078	0.0816	0.8346	0.83895	0.07085	0	0	0	0	8.6
258.035	258.042	2010-09-16 00:49:59	2010-09-16 01:00:00	FCE2.1			0.20535	246	0.014	0.016	0.018	0.02955	0.0782	0.08465	0.8001	0.80215	0.0486	0	0	0	0	8.9
258.042	258.049	2010-09-16 01:00:00	2010-09-16 01:09:59	FCE2.1			0.17685	237	0.013	0.017	0.018	0.0296	0.082	0.08875	0.75765	0.7579	0.0417	0	0	0	0	9.9
258.049	258.056	2010-09-16 01:09:59	2010-09-16 01:20:00	FCE2.1			0.08926	247	0.013	0.017	0.019	0.02965	0.0846	0.09075	0.7099	0.70965	0.0464	0	0	0	0	8.7
258.056	258.062	2010-09-16 01:20:00	2010-09-16 01:30:00	FCE2.1			0.11797	244	0.013	0.017	0.019	0.03405	0.08815	0.09115	0.6567	0.65615	0.0497	0	0	0	0	8.5
258.062	258.069	2010-09-16 01:30:00	2010-09-16 01:39:59	FCE2.1			0.17734	232	0.014	0.017	0.019	0.03575	0.09005	0.0912	0.6062	0.60545	0.05175	0	0	0	0	9.3
258.069	258.076	2010-09-16 01:39:59	2010-09-16 01:50:00	FCE2.1			0.155	247	0.014	0.017	0.019	0.0366	0.08925	0.08905	0.54725	0.5463	0.05185	0	0	0	0	10.5
258.076	258.083	2010-09-16 01:50:00	2010-09-16 01:59:59	FCE2.1			0.05525	244	0.014	0.017	0.019	0.0375	0.0926	0.09125	0.4873	0.48625	0.0538	0	0	0	0	10.2
258.083	258.09	2010-09-16 01:59:59	2010-09-16 02:10:00				0.006	240	0.015	0.017	0.019	0.0376	0.09205	0.09085	0.4266	0.4244	0.05345	0	0	0	0	10.5
258.09	258.097	2010-09-16 02:10:00	2010-09-16 02:19:59				0.00205	234	0.015	0.018	0.019	0.04005	0.0928	0.09035	0.379	0.37545	0.05515	0	0	0	0	8.7
258.097	258.104	2010-09-16 02:19:59	2010-09-16 02:30:00				0.00696	233	0.015	0.017	0.018	0.04045	0.09435	0.0869	0.32935	0.32835	0.0538	0	0	0	0	8.9
258.104	258.111	2010-09-16 02:30:00	2010-09-16 02:39:59				-0.00255	246	0.015	0.017	0.017	0.04095	0.09365	0.0854	0.23955	0.24225	0.0548	0	0	0	0	9.4
258.111	258.118	2010-09-16 02:39:59	2010-09-16 02:50:00				-0.0021	255	0.015	0.017	0.017	0.04165	0.0941	0.08915	0.11655	0.1157	0.0562	0	0	0	0	8.3
258.118	258.125	2010-09-16 02:50:00	2010-09-16 03:00:00	NCE0.2			-0.00068	250	0.015	0.018	0.019	0.04025	0.09885	0.09615	0.0507	0.04195	0.05665	0	0	0	0	8.3
258.125	258.132	2010-09-16 03:00:00	2010-09-16 03:09:59	NCE0.2			-0.00266	246	0.014	0.02	0.02	0.04045	0.1	0.0964	0.04745	0.04045	0.0577	0	0	0	0	9.9
258.132	258.139	2010-09-16 03:09:59	2010-09-16 03:20:00	NCE0.2			0.0014	249	0.014	0.022	0.022	0.0423	0.09805	0.09415	0.04475	0.03555	0.0523	0	0	0	0	9.7
258.139	258.146	2010-09-16 03:20:00	2010-09-16 03:29:59	NCE0.2			0.00721	242	0.013	0.022	0.022	0.03955	0.0932	0.09415	0.04445	0.0328	0.04895	0	0	0	0	10.4
258.146	258.153	2010-09-16 03:29:59	2010-09-16 03:40:00	NCE0.2			-0.0012	245	0.014	0.022	0.023	0.0392	0.0928	0.0942	0.0411	0.0318	0.04775	0	0	0	0	9.3
258.153	258.16	2010-09-16 03:40:00	2010-09-16 03:49:59	NCE0.2			-0.00325	245	0.012	0.022	0.022	0.0403	0.0935	0.094	0.0406	0.03475	0.04965	0	0	0	0	8.5
258.16	258.167	2010-09-16 03:49:59	2010-09-16 04:00:00	NCE0.2			0.00265	247	0.01	0.022	0.022	0.04235	0.0894	0.09045	0.03855	0.03675	0.0499	0	0	0	0	8.3
258.167	258.174	2010-09-16 04:00:00	2010-09-16 04:09:59	NCE0.2			-0.00217	247	0.011	0.023	0.022	0.04635	0.0852	0.08665	0.03765	0.03835	0.0516	0	0	0	0	9.5
258.174	258.181	2010-09-16 04:09:59	2010-09-16 04:20:00	NCE0.2			-0.00188	240	0.011	0.023	0.022	0.0435	0.08245	0.0848	0.0381	0.03725	0.0495	0	0	0	0	8.8
258.181	258.188	2010-09-16 04:20:00	2010-09-16 04:30:00	NCE0.2			0.0016	238	0.011	0.023	0.022	0.0416	0.07765	0.08285	0.03875	0.04045	0.05075	0	0	0	0	9
258.188	258.194	2010-09-16 04:30:00	2010-09-16 04:39:59	NCE0.2			0.00429	240	0.011	0.023	0.022	0.03995	0.07435	0.07745	0.03675	0.0415	0.0478	0	0	0	0	8.6
258.194	258.201	2010-09-16 04:39:59	2010-09-16 04:50:00	NCE0.2			0.0044	238	0.011	0.023	0.023	0.03975	0.07065	0.0684	0.0351	0.04145	0.0462	0	0	0	0	7.8
258.201	258.208	2010-09-16 04:50:00	2010-09-16 04:59:59	NCE0.2			0.00417	227	0.011	0.024	0.023	0.0386	0.06135	0.05075	0.03465	0.0421	0.04495	0	0	0	0	7.7
258.208	258.215	2010-09-16 04:59:59	2010-09-16 05:10:00	NCE0.2			0.0005	227	0.011	0.023	0.022	0.03805	0.0589	0.04625	0.03965	0.042	0.04485	0	0	0	0	8.2
258.215	258.222	2010-09-16 05:10:00	2010-09-16 05:19:59	NCE0.2			-0.00487	233	0.011	0.023	0.022	0.03635	0.058	0.0455	0.04115	0.04345	0.04525	0	0	0	0	8
258.222	258.229	2010-09-16 05:19:59	2010-09-16 05:30:00	NCE0.2			-0.00051	241	0.011	0.022	0.022	0.0348	0.05805	0.04245	0.04275	0.0437	0.0514	0	0	0	0	9
258.229	258.236	2010-09-16 05:30:00	2010-09-16 05:39:59	NCE0.2			-0.00923	240	0.011	0.022	0.022	0.0337	0.05695	0.0427	0.04765	0.04625	0.05225	0	0	0	0	8.8
258.236	258.243	2010-09-16 05:39:59	2010-09-16 05:50:00	NCE0.2			0.00357	260	0.011	0.023	0.022	0.0314	0.05465	0.0434	0.05305	0.0506	0.0555	0	0	0	0	6.8
258.243	258.25	2010-09-16 05:50:00	2010-09-16 06:00:00	NCE0.2			-0.00193	246	0.012	0.024	0.022	0.02695	0.05285	0.04465	0.05765	0.04995	0.05675	0	0	0	0	6.5
258.25	258.257	2010-09-16 06:00:00	2010-09-16 06:09:59	NCE0.2			-0.00071	253	0.012	0.024	0.022	0.04945	0.05505	0.0719	0.06025	0.05115	0.05595	0	0	0	0	6.8
258.257	258.264	2010-09-16 06:09:59	2010-09-16 06:20:00				-0.0052	247	0.011	0.023	0.022	0.08065	0.06235	0.1021	0.06285	0.05065	0.05745	0	0.1818	0.3636	1	6.3
258.264	258.271	2010-09-16 06:20:00	2010-09-16 06:29:59				-0.00163	240	0.013	0.023	0.022	0.0817	0.0737	0.1134	0.0655	0.0635	0.06155	0	0.2222	0.4444	1	6
258.271	258.278	2010-09-16 06:29:59	2010-09-16 06:40:00				0.00288	246	0.013	0.023	0.022	0.08305	0.0828	0.1244	0.1151	0.13335	0.0693	0	0	0	1	6.1
258.278	258.285	2010-09-16 06:40:00	2010-09-16 06:49:59				0.00167	243	0.013	0.023	0.023	0.0833	0.0945	0.13435	0.12875	0.15215	0.07075	0	0	0	1	7
258.285	258.292	2010-09-16 06:49:59	2010-09-16 07:00:00				-0.00052	251	0.013	0.022	0.022	0.0854	0.1199	0.1457	0.13725	0.1668	0.0738	0	0	0	1	6.2
258.292	258.299	2010-09-16 07:00:00	2010-09-16 07:09:59				0.00172	251	0.014	0.022	0.021	0.0861	0.1308	0.1554	0.1659	0.19665	0.0732	0	0	0.1818	1	5.5
258.299	258.306	2010-09-16 07:09:59	2010-09-16 07:20:00				0.001	262	0.016	0.024	0.019	0.0876	0.13685	0.16595	0.2579	0.2656	0.09	0	0.2222	0	1	6.3
258.306	258.312	2010-09-16 07:20:00	2010-09-16 07:30:00				0.0029	251	0.016	0.023	0.018	0.0878	0.1468	0.1772	0.3214	0.3333	0.0895	0	0	0	0	6.3
258.312	258.319	2010-09-16 07:30:00	2010-09-16 07:39:59				0.01425	264	0.017	0.023	0.019	0.0881	0.1577	0.18755	0.36935	0.379	0.0886	0	0	0	0	5.3
258.319	258.326	2010-09-16 07:39:59	2010-09-16 07:50:00				0.0318	258	0.018	0.023	0.021	0.0882	0.16455	0.19435	0.4042	0.4108	0.08565	0	0	0	0	5.7
258.326	258.333	2010-09-16 07:50:00	2010-09-16 07:59:59				0.06521	245	0.019	0.023	0.021	0.08965	0.1718	0.2041	0.4143	0.42095	0.08285	0	0	0	0	5.6
258.333	258.34	2010-09-16 07:59:59	2010-09-16 08:10:00				0.08062	255	0.019	0.023	0.023	0.0696	0.17665	0.2035	0.43455	0.4384	0.08325	0	0	0	0	6
258.34	258.347	2010-09-16 08:10:00	2010-09-16 08:19:59				0.10303	252	0.02	0.023	0.024	0.0472	0.1832	0.2003	0.4507	0.45605	0.08255	0	0	0	0	6.2
258.347	258.354	2010-09-16 08:19:59	2010-09-16 08:30:00				0.0989	254	0.02	0.022	0.024	0.04835	0.1921	0.20655	0.462	0.46455	0.0801	0	0	0	0	6.2
258.354	258.361	2010-09-16 08:30:00	2010-09-16 08:39:59				0.0975	241	0.02	0.022	0.023	0.056	0.19335	0.21325	0.4525	0.4499	0.0759	0	0	0	0	7.1
258.361	258.368	2010-09-16 08:39:59	2010-09-16 08:50:00				0.06605	246	0.02	0.022	0.023	0.0608	0.1922	0.21805	0.44895	0.44705	0.0854	0	0	0	0	6.4
258.368	258.375	2010-09-16 08:50:00	2010-09-16 09:00:00				0.03427	262	0.021	0.024	0.024	0.0608	0.18835	0.22135	0.4467	0.44495	0.08825	0	0	0	0	6.5
258.375	258.382	2010-09-16 09:00:00	2010-09-16 09:09:59				0.05467	261	0.021	0.024	0.024	0.06685	0.19675	0.2205	0.43745	0.44055	0.11915	0	0	0	0	5.6
258.382	258.389	2010-09-16 09:09:59	2010-09-16 09:20:00				0.0396	266	0.023	0.025	0.024	0.07225	0.21755	0.2277	0.3924	0.41025	0.109	0	0	0	0	4.9
258.389	258.396	2010-09-16 09:20:00	2010-09-16 09:29:59				0.02775	253	0.023	0.027	0.024	0.0731	0.22	0.2287	0.3422	0.37255	0.11125	0	0	0	0	6.8
258.396	258.403	2010-09-16 09:29:59	2010-09-16 09:40:00				0.00353	260	0.023	0.028	0.024	0.07845	0.22295	0.2283	0.2899	0.33215	0.11535	0	0	0	0	6.8
258.403	258.41	2010-09-16 09:40:00	2010-09-16 09:49:59				0.00537	253	0.023	0.029	0.024	0.08705	0.224	0.2231	0.23785	0.28205	0.1152	0	0	0	0	6.9
258.41	258.417	2010-09-16 09:49:59	2010-09-16 10:00:00				0.00668	259	0.023	0.028	0.024	0.08845	0.21765	0.21255	0.21875	0.2635	0.11555	0	0	0	0	6.7
258.417	258.424	2010-09-16 10:00:00	2010-09-16 10:09:59				0.0089	259	0.024	0.029	0.024	0.08675	0.2142	0.2042	0.1728	0.2253	0.1144	0	0	0	0	6.6
258.424	258.431	2010-09-16 10:09:59	2010-09-16 10:20:00				0.0034	246	0.025	0.031	0.024	0.09025	-999	-999	0.12475	-999	-999	0	0	0	0	6.1
258.431	258.438	2010-09-16 10:20:00	2010-09-16 10:30:00				0.0064	259	0.026	0.032	0.024	0.0905	-999	-999	0.07135	-999	-999	0	0	0	0	6.4
258.438	258.444	2010-09-16 10:30:00	2010-09-16 10:39:59				-0.01471	243	0.028	0.034	0.024	0.08535	0.10035	0.0817	0.0728	0.0719	0.0559	0	0	0	0	5.6
258.444	258.451	2010-09-16 10:39:59	2010-09-16 10:50:00				0.0109	229	0.03	0.035	0.023	0.08185	0.20165	0.1567	0.0754	0.135	0.103	0	0	0	0	7
258.451	258.458	2010-09-16 10:50:00	2010-09-16 10:59:59				-0.00387	230	0.031	0.036	0.023	0.0804	0.19595	0.14855	0.073	0.1269	0.0999	0	0	0	0	6.8
258.458	258.465	2010-09-16 10:59:59	2010-09-16 11:10:00				0.00455	235	0.03	0.036	0.023	0.07715	0.18215	0.1501	0.0628	0.08715	0.0496	0	0	0	0	6.4
258.465	258.472	2010-09-16 11:10:00	2010-09-16 11:19:59				0.0019	239	0.03	0.035	0.022	0.07155	0.1537	0.1299	0.04705	0.0669	0.0492	0	0	0	0	6.6
258.472	258.479	2010-09-16 11:19:59	2010-09-16 11:30:00				-0.00492	231	0.031	0.036	0.022	0.0711	0.1528	0.1289	0.0478	0.06595	0.0481	0	0	0	0	7.7
258.479	258.486	2010-09-16 11:30:00	2010-09-16 11:39:59				0.0068	241	0.034	0.036	0.022	0.06515	0.15035	0.1291	0.0464	0.06695	0.0488	0	0	0	0	6.7
258.486	258.493	2010-09-16 11:39:59	2010-09-16 11:50:00				-0.00605	236	0.035	0.036	0.021	0.0542	0.14525	0.134	0.0494	0.06965	0.04875	0	0	0	0	7.5
258.493	258.5	2010-09-16 11:50:00	2010-09-16 12:00:00				0.00495	251	0.039	0.037	0.023	0.0509	0.1485	0.1407	0.0516	0.0713	0.0481	0	0	0	0	7
258.5	258.507	2010-09-16 12:00:00	2010-09-16 12:09:59				-0.00708	230	0.039	0.037	0.024	0.05105	0.1499	0.14415	0.05325	0.07295	0.04905	0	0	0	0	7
258.507	258.514	2010-09-16 12:09:59	2010-09-16 12:20:00				-0.0124	229	0.041	0.037	0.026	0.0467	0.14575	0.14745	0.13025	0.14295	0.05105	0	0	0	0	8.4
258.514	258.521	2010-09-16 12:20:00	2010-09-16 12:29:59				-0.00017	232	0.043	0.037	0.03	0.0478	0.14085	0.15145	0.24165	0.23985	0.0598	0	0	0	0	7.3
258.521	258.528	2010-09-16 12:29:59	2010-09-16 12:40:00				0.00524	228	0.046	0.037	0.033	0.05445	0.13685	0.1565	0.33745	0.31945	0.0874	0	0	0	0	7.9
258.528	258.535	2010-09-16 12:40:00	2010-09-16 12:49:59				-0.00327	225	0.048	0.036	0.036	0.0663	0.13285	0.16245	0.39035	0.35775	0.10695	0	0	0	0	7.3
258.535	258.542	2010-09-16 12:49:59	2010-09-16 13:00:00				-0.0093	250	0.05	0.035	0.037	0.07475	0.1293	0.1692	0.449	0.4087	0.11475	0	0.2	0	1	7.3
258.542	258.549	2010-09-16 13:00:00	2010-09-16 13:09:59				0.0203	240	0.051	0.035	0.038	0.07925	0.12355	0.17055	0.49995	0.4529	0.12425	0	0	0.9091	1	6.6
258.549	258.556	2010-09-16 13:09:59	2010-09-16 13:20:00	FCE4.1			0.09834	224	0.051	0.034	0.039	0.0836	0.11675	0.1727	0.5322	0.48235	0.12645	0.2222	0	0.2222	1	7.9
258.556	258.562	2010-09-16 13:20:00	2010-09-16 13:30:00	FCE4.1			0.18155	226	0.051	0.033	0.039	0.08445	0.1123	0.17485	0.55595	0.5058	0.1272	0	0.5455	0.1818	1	8.1
258.562	258.569	2010-09-16 13:30:00	2010-09-16 13:39:59	FCE4.1			0.20229	238	0.051	0.032	0.04	0.08985	0.1028	0.17715	0.57335	0.518	0.13255	0.2222	0	0	1	7.9
258.569	258.576	2010-09-16 13:39:59	2010-09-16 13:50:00	FCE4.1			0.1518	258	0.053	0.031	0.041	0.09485	0.09735	0.1764	0.59595	0.5344	0.1406	0.1818	0	0.1818	1	6.9
258.576	258.583	2010-09-16 13:50:00	2010-09-16 13:59:59	FCE4.1			0.16908	241	0.055	0.031	0.042	0.0961	0.0918	0.1735	0.61655	0.55025	0.1452	0	0.2222	0	1	7.6
258.583	258.59	2010-09-16 13:59:59	2010-09-16 14:10:00	FCE4.1			0.12132	252	0.057	0.031	0.043	0.0982	0.08695	0.1729	0.63	0.5609	0.148	0	0	0	1	7.6
258.59	258.597	2010-09-16 14:10:00	2010-09-16 14:19:59	FCE4.1			0.0909	247	0.059	0.029	0.043	0.0985	0.0874	0.1725	0.6282	0.5547	0.1498	0	0	0	1	7.4
258.597	258.604	2010-09-16 14:19:59	2010-09-16 14:30:00	FCE4.1			0.1054	254	0.06	0.028	0.044	0.09955	0.08705	0.17425	0.59835	0.52505	0.14895	0	0	0.2	1	7
258.604	258.611	2010-09-16 14:30:00	2010-09-16 14:39:59	FCE4.1			0.096	239	0.061	0.026	0.045	0.09715	0.09065	0.1747	0.5502	0.4864	0.13705	0	0	0	0	7.3
258.611	258.618	2010-09-16 14:39:59	2010-09-16 14:50:00	FCE4.1			0.11564	242	0.062	0.029	0.045	0.08915	0.09315	0.1732	0.51395	0.4783	0.12755	0	0	0	0	6.9
258.618	258.625	2010-09-16 14:50:00	2010-09-16 15:00:00	FCE4.1			0.11125	249	0.064	0.031	0.045	0.08165	0.0888	0.16035	0.464	0.43425	0.12555	0	0	0	0	6.7
258.625	258.632	2010-09-16 15:00:00	2010-09-16 15:09:59				0.02592	233	0.066	0.033	0.045	0.0749	0.08865	0.1481	0.40885	0.3815	0.11785	0	0	0	0	6.6
258.632	258.639	2010-09-16 15:09:59	2010-09-16 15:20:00				0.0179	251	0.066	0.033	0.045	0.07025	0.09275	0.14105	0.36635	0.3369	0.1157	0	0	0	0	6.8
258.639	258.646	2010-09-16 15:20:00	2010-09-16 15:29:59				-0.00034	252	0.066	0.033	0.045	0.0682	0.0906	0.13425	0.32955	0.29565	0.11475	0	0	0	0	6.4
258.646	258.653	2010-09-16 15:29:59	2010-09-16 15:40:00				0.00517	250	0.065	0.034	0.044	0.0602	-999	-999	0.2987	-999	-999	0	0	0	0	5.6
258.653	258.66	2010-09-16 15:40:00	2010-09-16 15:49:59				0.00353	247	0.064	0.035	0.043	0.05095	0.04575	0.05905	0.2524	0.1109	0.0471	0	0	0	0	6.3
258.66	258.667	2010-09-16 15:49:59	2010-09-16 16:00:00				0.005	238	0.063	0.035	0.042	0.04935	0.0915	0.1184	0.2004	0.18045	0.0908	0	0	0	0	5.7
258.667	258.674	2010-09-16 16:00:00	2010-09-16 16:09:59				-0.0058	233	0.067	0.035	0.046	0.0454	0.0911	0.1118	0.1501	0.13895	0.0892	0	0	0	0	5.5
258.674	258.681	2010-09-16 16:09:59	2010-09-16 16:20:00				0.00105	231	0.068	0.047	0.046	0.04395	0.0963	0.11395	0.0915	0.1211	0.10745	0	0	0	0	6.1
258.681	258.688	2010-09-16 16:20:00	2010-09-16 16:30:00				-0.00057	230	0.07	0.05	0.043	0.0353	0.10625	0.1132	0.05845	0.1169	0.1248	0	0	0	0	5.6
258.688	258.694	2010-09-16 16:30:00	2010-09-16 16:39:59				0.00013	244	0.077	0.05	0.052	0.03235	0.1008	0.1009	0.05245	0.112	0.1205	0	0	0	0	5.3
258.694	258.701	2010-09-16 16:39:59	2010-09-16 16:50:00				0.0072	229	0.078	0.051	0.059	0.0343	0.10085	0.09845	0.0499	0.10765	0.11515	0	0	0	0	5.6
258.701	258.708	2010-09-16 16:50:00	2010-09-16 16:59:59				0.00383	235	0.08	0.052	0.06	0.0376	0.10055	0.09735	0.04475	0.1055	0.10965	0	0	0	0	5.9
258.708	258.715	2010-09-16 16:59:59	2010-09-16 17:10:00				0.00612	223	0.082	0.052	0.061	0.0372	0.09775	0.09755	0.0541	0.1035	0.1126	0	0	0	0	6
258.715	258.722	2010-09-16 17:10:00	2010-09-16 17:19:59				0.00333	223	0.083	0.052	0.063	0.037	0.09735	0.10595	0.05285	0.1016	0.1119	0	0	0	0	5.3
258.722	258.729	2010-09-16 17:19:59	2010-09-16 17:30:00				0.0009	236	0.084	0.052	0.065	0.0407	0.0969	0.1085	0.0531	0.1007	0.11285	0	0	0	0	4.3
258.729	258.736	2010-09-16 17:30:00	2010-09-16 17:39:59				-0.00473	228	0.085	0.052	0.067	0.0523	0.09675	0.1174	0.13135	0.12805	0.12165	0	0	0	0	4.6
258.736	258.743	2010-09-16 17:39:59	2010-09-16 17:50:00				0.00398	232	0.084	0.052	0.066	0.06765	0.09895	0.13425	0.1928	0.16065	0.1302	0	0	0	0	4.3
258.743	258.75	2010-09-16 17:50:00	2010-09-16 18:00:00				0.00017	261	0.083	0.052	0.065	0.0708	0.10595	0.1462	0.25375	0.2153	0.1343	0	0	0.1818	1	3.5
258.75	258.757	2010-09-16 18:00:00	2010-09-16 18:09:59				-0.00354	263	0.082	0.051	0.063	0.0816	0.10885	0.1603	0.28875	0.2308	0.1485	4.2222	0	0.2222	1	2.4
258.757	258.764	2010-09-16 18:09:59	2010-09-16 18:20:00				0.0225	259	0.081	0.05	0.062	0.086	0.10555	0.1677	0.36645	0.28635	0.155	2.1818	1.8182	0.9091	1	2.7
258.764	258.771	2010-09-16 18:20:00	2010-09-16 18:29:59				0.0125	262	0.08	0.05	0.062	0.08785	0.10395	0.171	0.43625	0.3456	0.15585	1.3333	0	0.4444	1	4.6
258.771	258.778	2010-09-16 18:29:59	2010-09-16 18:40:00				0.03815	259	0.079	0.049	0.062	0.0878	0.11605	0.1813	0.4934	0.4006	0.16545	0.1818	0	0	1	7.2
258.778	258.785	2010-09-16 18:40:00	2010-09-16 18:49:59				0.14292	258	0.078	0.048	0.062	0.087	0.11765	0.1834	0.55315	0.46055	0.1753	0.2222	0.2222	0	1	5.5
258.785	258.792	2010-09-16 18:49:59	2010-09-16 19:00:00				0.22412	241	0.076	0.048	0.062	0.08435	0.1191	0.1814	0.5941	0.51675	0.17535	0.4	0.2	0.6	1	5.9
258.792	258.799	2010-09-16 19:00:00	2010-09-16 19:09:59				0.17628	242	0.075	0.047	0.062	0.08415	0.11915	0.18075	0.6448	0.5713	0.1745	0	0.1818	0.3636	1	5.3
258.799	258.806	2010-09-16 19:09:59	2010-09-16 19:20:00				0.25189	247	0.074	0.047	0.062	0.08305	0.11665	0.177	0.6967	0.62945	0.1742	0	0	0	1	5.7
258.806	258.812	2010-09-16 19:20:00	2010-09-16 19:30:00				0.27815	242	0.074	0.047	0.062	0.08155	0.11745	0.1767	0.7409	0.67695	0.17465	0	0	0	1	5.1
258.812	258.819	2010-09-16 19:30:00	2010-09-16 19:39:59				0.27813	236	0.074	0.046	0.062	0.07595	0.1449	0.1934	0.7789	0.71785	0.18515	0	0	0	1	6.2
258.819	258.826	2010-09-16 19:39:59	2010-09-16 19:50:00				0.2812	237	0.074	0.046	0.062	0.0638	0.20665	0.2356	0.8121	0.748	0.22515	0.1818	0.1818	0	1	6.1
258.826	258.833	2010-09-16 19:50:00	2010-09-16 19:59:59				0.291	228	0.073	0.046	0.062	0.0576	0.204	0.2269	0.8391	0.78135	0.22155	0	0.2222	0.2222	1	6.8
258.833	258.84	2010-09-16 19:59:59	2010-09-16 20:10:00				0.28202	231	0.07	0.047	0.059	0.04155	0.2021	0.2168	0.87095	0.8211	0.2134	0.1818	0	0.1818	1	7
258.84	258.847	2010-09-16 20:10:00	2010-09-16 20:19:59				0.3078	229	0.069	0.038	0.058	0.03	0.19815	0.20615	0.88575	0.84415	0.2053	0	0	0	1	5.6
258.847	258.854	2010-09-16 20:19:59	2010-09-16 20:30:00				0.31468	243	0.067	0.034	0.059	0.02565	0.1934	0.1975	0.89685	0.86085	0.20015	0	0.2	0	1	7
258.854	258.861	2010-09-16 20:30:00	2010-09-16 20:39:59				0.3066	228	0.058	0.034	0.051	0.0237	0.1862	0.1877	0.90685	0.87725	0.19375	0.1818	0	0.3636	1	6.6
258.861	258.868	2010-09-16 20:39:59	2010-09-16 20:50:00				0.31212	228	0.056	0.033	0.042	0.0234	0.1831	0.1847	0.90945	0.88505	0.1857	0	0	0	1	7.7
258.868	258.875	2010-09-16 20:50:00	2010-09-16 21:00:00				0.29253	228	0.052	0.032	0.04	0.0236	0.1815	0.1831	0.91345	0.89145	0.18225	0.3636	0.3636	0.3636	1	7.9
258.875	258.882	2010-09-16 21:00:00	2010-09-16 21:09:59				0.23471	213	0.048	0.032	0.037	0.0238	0.1822	0.18335	0.9134	0.8919	0.18085	0	0	0.2222	1	8.7
258.882	258.889	2010-09-16 21:09:59	2010-09-16 21:20:00				0.2511	220	0.046	0.033	0.034	0.03035	0.18245	0.1851	0.90905	0.88295	0.18875	0.1818	0.3636	0.5455	1	7.7
258.889	258.896	2010-09-16 21:20:00	2010-09-16 21:29:59				0.30067	233	0.044	0.033	0.031	0.03645	0.18245	0.18805	0.9068	0.8762	0.197	0	0	0.2222	1	6.5
258.896	258.903	2010-09-16 21:29:59	2010-09-16 21:40:00				0.33054	238	0.043	0.034	0.027	0.03935	0.1618	0.1706	0.90295	0.8723	0.18845	0	0	0.1818	1	6.7
258.903	258.91	2010-09-16 21:40:00	2010-09-16 21:49:59	FCE5.1			0.31278	227	0.045	0.035	0.026	0.04	0.07745	0.0951	0.90205	0.8792	0.13655	0	0	0	0	6.9
258.91	258.917	2010-09-16 21:49:59	2010-09-16 22:00:00	FCE5.1			0.33037	239	0.044	0.034	0.027	0.04485	0.07755	0.0992	0.89615	0.87105	0.13865	0	0	0	0	5.8
258.917	258.924	2010-09-16 22:00:00	2010-09-16 22:09:59	FCE5.1			0.31098	246	0.044	0.034	0.028	0.0447	0.07905	0.10265	0.8945	0.8703	0.1355	0	0	0	0	6.5
258.924	258.931	2010-09-16 22:09:59	2010-09-16 22:20:00	FCE5.1			0.27143	241	0.044	0.033	0.028	0.04565	0.08045	0.1058	0.8908	0.8673	0.12735	0	0	0	0	6.5
258.931	258.938	2010-09-16 22:20:00	2010-09-16 22:30:00	FCE5.1			0.24235	242	0.043	0.033	0.028	0.04525	0.0867	0.1118	0.88765	0.8641	0.12295	0	0	0	0	6.7
258.938	258.944	2010-09-16 22:30:00	2010-09-16 22:39:59	FCE5.1			0.27887	248	0.043	0.033	0.027	0.04525	0.0917	0.1173	0.88535	0.85945	0.1241	0	0	0	0	5.2
258.944	258.951	2010-09-16 22:39:59	2010-09-16 22:50:00	FCE5.1			0.2987	247	0.044	0.033	0.028	0.0469	0.09625	0.1216	0.8841	0.8547	0.1283	0	0	0	0	6.4
258.951	258.958	2010-09-16 22:50:00	2010-09-16 22:59:59	FCE5.1			0.28258	248	0.045	0.031	0.029	0.04825	0.0983	0.12455	0.88415	0.853	0.1325	0	0	0	0	6.4
258.958	258.965	2010-09-16 22:59:59	2010-09-16 23:10:00	FCE5.1			0.30522	242	0.046	0.03	0.029	0.04815	0.10355	0.1292	0.8891	0.8585	0.13485	0	0	0	0	5.2
258.965	258.972	2010-09-16 23:10:00	2010-09-16 23:19:59	FCE5.1			0.34225	239	0.046	0.029	0.029	0.04425	0.11135	0.134	0.89315	0.86585	0.12645	0	0	0	0	5.7
258.972	258.979	2010-09-16 23:19:59	2010-09-16 23:30:00	FCE5.1			0.35781	245	0.047	0.029	0.029	0.03915	0.11705	0.13375	0.89995	0.8771	0.1144	0	0	0	0	5.5
258.979	258.986	2010-09-16 23:30:00	2010-09-16 23:39:59	FCE5.1			0.32595	225	0.048	0.028	0.029	0.0369	0.1185	0.1296	0.90525	0.88505	0.10895	0	0	0	0	6.5
258.986	258.993	2010-09-16 23:39:59	2010-09-16 23:50:00	FCE5.1			0.28262	221	0.049	0.026	0.03	0.0385	0.1177	0.1272	0.90575	0.88385	0.1194	0	0	0	0	8.8
258.993	259	2010-09-16 23:50:00	2010-09-17				0.29455	327	0.049	0.026	0.03	0.03435	0.123	0.1328	0.91165	0.8877	0.1504	0	0	0	0	9.4
259	259.007	2010-09-17	2010-09-17 00:09:59				0.31254	-999	0.048	0.025	0.03	0.033	0.129	0.13885	0.9133	0.88495	0.1777	0	0	0	0	0
259.007	259.014	2010-09-17 00:09:59	2010-09-17 00:20:00				0.3126	-999	0.046	0.025	0.029	0.0328	0.13095	0.1399	0.91195	0.88075	0.18615	0	0	0	0	0
259.014	259.021	2010-09-17 00:20:00	2010-09-17 00:29:59				0.323	-999	0.045	0.026	0.028	0.0329	0.12725	0.13555	0.91165	0.88095	0.186	0	0	0	0	0
259.021	259.028	2010-09-17 00:29:59	2010-09-17 00:40:00				0.32909	-999	0.045	0.027	0.026	0.03245	0.1259	0.1332	0.91365	0.88275	0.1878	0.1818	0	0	1	0
259.028	259.035	2010-09-17 00:40:00	2010-09-17 00:49:59				0.29525	311	0.043	0.026	0.025	0.03	0.1261	0.1333	0.91825	0.887	0.19735	0.4444	0.4444	0.6667	1	3.5
259.035	259.042	2010-09-17 00:49:59	2010-09-17 01:00:00				0.33424	296	0.043	0.026	0.026	0.02765	0.1257	0.13175	0.92185	0.88575	0.2295	0.2	0.4	0	1	5.4
259.042	259.049	2010-09-17 01:00:00	2010-09-17 01:09:59				0.3325	253	0.045	0.026	0.027	0.0296	0.1218	0.1258	0.9222	0.8839	0.23955	0	0	0	1	6.4
259.049	259.056	2010-09-17 01:09:59	2010-09-17 01:20:00				0.34713	251	0.045	0.027	0.026	0.0307	0.11445	0.11695	0.92425	0.8861	0.2407	0	0	0.2222	1	7.4
259.056	259.062	2010-09-17 01:20:00	2010-09-17 01:30:00				0.33675	265	0.045	0.027	0.025	0.0318	0.1093	0.1115	0.9246	0.8853	0.2444	0	0	0.3636	1	7.3
259.062	259.069	2010-09-17 01:30:00	2010-09-17 01:39:59				0.31712	245	0.045	0.026	0.025	0.03145	0.10265	0.10625	0.9238	0.88395	0.24515	0.2222	0	0.2222	1	6.7
259.069	259.076	2010-09-17 01:39:59	2010-09-17 01:50:00				0.2645	259	0.044	0.025	0.028	0.02905	0.10005	0.1031	0.9252	0.8865	0.24335	0.3636	0.3636	0.5455	1	5.7
259.076	259.083	2010-09-17 01:50:00	2010-09-17 01:59:59				0.35721	-999	0.045	0.025	0.029	0.0272	0.0935	0.09095	0.9249	0.88895	0.22905	0	0	0	1	4.9
259.083	259.09	2010-09-17 01:59:59	2010-09-17 02:10:00				0.39787	-999	0.046	0.025	0.031	0.0269	0.08685	0.0797	0.92585	0.89255	0.21665	0	0	0.1818	1	4.9
259.09	259.097	2010-09-17 02:10:00	2010-09-17 02:19:59				0.32388	313	0.048	0.025	0.034	0.0271	0.087	0.0767	0.9308	0.8996	0.2147	0	0	0	1	5.4
259.097	259.104	2010-09-17 02:19:59	2010-09-17 02:30:00				0.35691	241	0.048	0.025	0.035	0.0263	0.0896	0.079	0.9345	0.90295	0.21725	0	0	0.2	1	5.9
259.104	259.111	2010-09-17 02:30:00	2010-09-17 02:39:59				0.34997	247	0.048	0.025	0.036	0.02685	0.08675	0.07525	0.9365	0.906	0.2155	0	0	0	1	5.8
259.111	259.118	2010-09-17 02:39:59	2010-09-17 02:50:00				0.37477	255	0.049	0.025	0.036	0.0289	0.08365	0.07195	0.9374	0.9083	0.20795	0	0	0	1	6.1
259.118	259.125	2010-09-17 02:50:00	2010-09-17 03:00:00				0.34862	294	0.047	0.025	0.034	0.0311	0.08775	0.0836	0.9341	0.91	0.1714	0	0	0	1	5.7
259.125	259.132	2010-09-17 03:00:00	2010-09-17 03:09:59				0.34121	277	0.046	0.024	0.035	0.03245	0.0903	0.09585	0.92095	0.897	0.1566	0	0.2222	0	1	5.4
259.132	259.139	2010-09-17 03:09:59	2010-09-17 03:20:00				0.37	243	0.047	0.023	0.037	0.0353	0.09585	0.1088	0.91155	0.8868	0.15405	0	0	0	0	4.8
259.139	259.146	2010-09-17 03:20:00	2010-09-17 03:29:59				0.34371	242	0.049	0.022	0.04	0.0365	0.10215	0.12005	0.90815	0.88445	0.14795	0	0	0	0	4.9
259.146	259.153	2010-09-17 03:29:59	2010-09-17 03:40:00				0.31693	247	0.05	0.022	0.043	0.03575	0.1091	0.1273	0.90705	0.88445	0.144	0	0	0	0	5.1
259.153	259.16	2010-09-17 03:40:00	2010-09-17 03:49:59				0.31425	247	0.051	0.021	0.046	0.0359	0.10995	0.12905	0.9085	0.88775	0.13465	0	0	0	0	4.1
259.16	259.167	2010-09-17 03:49:59	2010-09-17 04:00:00				0.287	253	0.051	0.021	0.047	0.0362	0.11075	0.1302	0.90975	0.89055	0.1254	0	0	0	0	4.5
259.167	259.174	2010-09-17 04:00:00	2010-09-17 04:09:59				0.2824	339	0.052	0.021	0.047	0.03605	0.1119	0.13155	0.9095	0.89175	0.1122	0	0	0	0	5.8
259.174	259.181	2010-09-17 04:09:59	2010-09-17 04:20:00				0.2868	-999	0.053	0.019	0.048	0.03485	0.1117	0.1333	0.9052	0.8881	0.1018	0	0	0	0	6.3
259.181	259.188	2010-09-17 04:20:00	2010-09-17 04:30:00				0.3299	-999	0.054	0.018	0.049	0.0366	0.1127	0.13755	0.89025	0.8709	0.0979	0	0	0	0	6.3
259.188	259.194	2010-09-17 04:30:00	2010-09-17 04:39:59				0.36058	-999	0.055	0.018	0.05	0.0377	0.11735	0.1446	0.88275	0.8624	0.09815	0	0	0	0	6.3
259.194	259.201	2010-09-17 04:39:59	2010-09-17 04:50:00				0.3583	-999	0.056	0.018	0.053	0.0385	0.1212	0.1499	0.87875	0.8587	0.09145	0	0	0	0	6.3
259.201	259.208	2010-09-17 04:50:00	2010-09-17 04:59:59				0.33371	-999	0.057	0.018	0.055	0.03905	0.1192	0.1478	0.87345	0.85385	0.0873	0	0	0	0	6.3
259.208	259.215	2010-09-17 04:59:59	2010-09-17 05:10:00				0.37337	254	0.058	0.018	0.057	0.0364	0.11835	0.14335	0.88835	0.8721	0.08225	0	0	0	0	5.3
259.215	259.222	2010-09-17 05:10:00	2010-09-17 05:19:59				0.31957	247	0.059	0.017	0.06	0.0335	0.1149	0.13575	0.8992	0.8843	0.08295	0	0	0	0	5.7
259.222	259.229	2010-09-17 05:19:59	2010-09-17 05:30:00				0.32471	247	0.06	0.017	0.063	0.03085	0.1109	0.128	0.9026	0.88815	0.0816	0	0	0	0	5
259.229	259.236	2010-09-17 05:30:00	2010-09-17 05:39:59				0.29405	253	0.06	0.017	0.065	0.03145	0.10665	0.12435	0.90135	0.88655	0.08055	0	0	0	0	4.8
259.236	259.243	2010-09-17 05:39:59	2010-09-17 05:50:00				0.30488	279	0.061	0.017	0.065	0.0333	0.1069	0.1267	0.8953	0.8785	0.0864	0	0	0	0	3.9
259.243	259.25	2010-09-17 05:50:00	2010-09-17 06:00:00				0.3065	347	0.061	0.017	0.066	0.03435	0.10925	0.1309	0.8829	0.8634	0.08995	0	0	0	0	3.5
259.25	259.257	2010-09-17 06:00:00	2010-09-17 06:09:59				0.32583	334	0.062	0.017	0.066	0.03475	0.1106	0.13155	0.87785	0.85765	0.09035	0	0	0	0	5.3
259.257	259.264	2010-09-17 06:09:59	2010-09-17 06:20:00				0.3285	259	0.062	0.017	0.067	0.03575	0.1108	0.13345	0.86575	0.8422	0.09595	0	0	0	0	5.9
259.264	259.271	2010-09-17 06:20:00	2010-09-17 06:29:59				0.32542	263	0.062	0.018	0.068	0.0342	0.11015	0.12975	0.87375	0.85155	0.0951	0	0	0	0	6.1
259.271	259.278	2010-09-17 06:29:59	2010-09-17 06:40:00				0.30512	258	0.063	0.018	0.071	0.033	0.1086	0.125	0.879	0.8558	0.10335	0	0	0	0	7.1
259.278	259.285	2010-09-17 06:40:00	2010-09-17 06:49:59				0.29595	255	0.065	0.017	0.073	0.03135	0.1051	0.11875	0.88	0.85555	0.11005	0	0	0	0	5.1
259.285	259.292	2010-09-17 06:49:59	2010-09-17 07:00:00				0.30277	233	0.067	0.019	0.077	0.02955	0.10275	0.11405	0.8712	0.84235	0.1186	0	0	0	0	5.9
259.292	259.299	2010-09-17 07:00:00	2010-09-17 07:09:59				0.23642	247	0.068	0.02	0.08	0.02925	0.1051	0.11585	0.8557	0.8201	0.12945	0	0	0	0	6.1
259.299	259.306	2010-09-17 07:09:59	2010-09-17 07:20:00				0.27232	240	0.069	0.021	0.081	0.03015	0.1078	0.11895	0.84075	0.80045	0.13335	0	0	0	0	5.6
259.306	259.312	2010-09-17 07:20:00	2010-09-17 07:30:00				0.30873	292	0.069	0.021	0.082	0.03295	0.10855	0.12315	0.82845	0.7846	0.1361	0	0	0	0	6.2
259.312	259.319	2010-09-17 07:30:00	2010-09-17 07:39:59				0.30691	247	0.073	0.021	0.083	0.03215	0.11005	0.1244	0.8134	0.76275	0.1456	0	0	0	0	4.8
259.319	259.326	2010-09-17 07:39:59	2010-09-17 07:50:00				0.2903	235	0.074	0.021	0.083	0.03105	0.11365	0.12805	0.7944	0.7345	0.15875	0	0	0	0	6.9
259.326	259.333	2010-09-17 07:50:00	2010-09-17 07:59:59				0.25159	247	0.076	0.021	0.086	0.03795	0.11085	0.12955	0.76985	0.7079	0.1599	0	0	0	0	6.5
259.333	259.34	2010-09-17 07:59:59	2010-09-17 08:10:00				0.25985	243	0.079	0.021	0.089	0.0432	0.1105	0.1368	0.73295	0.667	0.15965	0	0	0	0	6.3
259.34	259.347	2010-09-17 08:10:00	2010-09-17 08:19:59				0.19942	250	0.08	0.02	0.09	0.0461	0.1115	0.1408	0.71605	0.6525	0.1557	0	0	0	0	5.8
259.347	259.354	2010-09-17 08:19:59	2010-09-17 08:30:00				0.28671	262	0.081	0.02	0.091	0.0479	0.11365	0.14635	0.6844	0.62445	0.15415	0	0.2	0.2	1	4.5
259.354	259.361	2010-09-17 08:30:00	2010-09-17 08:39:59				0.1416	254	0.082	0.02	0.092	0.05375	0.11375	0.1495	0.64645	0.59705	0.15265	0	0.1818	0.5455	1	5.3
259.361	259.368	2010-09-17 08:39:59	2010-09-17 08:50:00				0.072	302	0.087	0.02	0.095	0.0579	0.1162	0.15445	0.5963	0.5621	0.1527	0	0	0.2222	1	6
259.368	259.375	2010-09-17 08:50:00	2010-09-17 09:00:00				0.031	283	0.089	0.02	0.097	0.0767	0.11985	0.16	0.5643	0.5535	0.15075	0	0	0	0	5.4
259.375	259.382	2010-09-17 09:00:00	2010-09-17 09:09:59				0.15679	278	0.089	0.02	0.096	0.07815	0.1148	0.1597	0.53265	0.53565	0.14375	0	0	0	0	4
259.382	259.389	2010-09-17 09:09:59	2010-09-17 09:20:00				0.1826	267	0.09	0.02	0.095	0.0804	0.11375	0.16335	0.49145	0.4827	0.13625	0	0	0	0	5.1
259.389	259.396	2010-09-17 09:20:00	2010-09-17 09:29:59				0.08838	259	0.09	0.019	0.095	0.08205	-999	-999	0.43825	-999	-999	0	0	0	0	5.2
259.396	259.403	2010-09-17 09:29:59	2010-09-17 09:40:00				0.10272	259	0.091	0.019	0.094	0.0912	-999	-999	0.38665	-999	-999	0	0	0	0	5.6
259.403	259.41	2010-09-17 09:40:00	2010-09-17 09:49:59				0.07462	274	0.09	0.019	0.092	0.09525	-999	-999	0.34055	-999	-999	0.2222	0	0	1	4.9
259.41	259.417	2010-09-17 09:49:59	2010-09-17 10:00:00				0.09914	265	0.09	0.019	0.091	0.09305	-999	-999	0.31875	-999	-999	0	0	0	0	5.3
259.417	259.424	2010-09-17 10:00:00	2010-09-17 10:09:59				0.14522	255	0.089	0.02	0.091	0.0938	0.1211	0.1812	0.30285	0.26765	0.05545	0	0	0	0	5.6
259.424	259.431	2010-09-17 10:09:59	2010-09-17 10:20:00				0.1027	257	0.091	0.02	0.091	0.0927	0.12305	0.1794	0.2652	0.2075	0.0697	0	0	0	0	5.7
259.431	259.438	2010-09-17 10:20:00	2010-09-17 10:30:00				0.00163	278	0.092	0.019	0.091	0.0922	0.1232	0.1765	0.23115	0.15845	0.07555	0	0	0	0	6.5
259.438	259.444	2010-09-17 10:30:00	2010-09-17 10:39:59				-0.00129	263	0.092	0.019	0.09	0.0893	0.1207	0.16935	0.19045	0.1567	0.0767	0	0	0	0	6.4
259.444	259.451	2010-09-17 10:39:59	2010-09-17 10:50:00				0.0094	262	0.091	0.02	0.088	0.0874	0.11885	0.16475	0.17785	0.1497	0.08	0	0	0	0	6.5
259.451	259.458	2010-09-17 10:50:00	2010-09-17 10:59:59				0.00442	265	0.091	0.018	0.086	0.07195	0.1169	0.1605	0.16195	0.1437	0.0769	0.2222	0	0	1	6.2
259.458	259.465	2010-09-17 10:59:59	2010-09-17 11:10:00				0.01258	262	0.089	0.016	0.082	0.07115	0.1165	0.1568	0.1121	0.1185	0.07395	0.5455	0.3636	0.3636	1	5.7
259.465	259.472	2010-09-17 11:10:00	2010-09-17 11:19:59				0.02475	269	0.089	0.015	0.08	0.06805	0.1141	0.1515	0.0747	0.092	0.07155	0	0	0.2222	1	6.1
259.472	259.479	2010-09-17 11:19:59	2010-09-17 11:30:00				0.01374	258	0.088	0.015	0.079	0.06465	0.1109	0.14415	0.0562	0.08445	0.07025	0	0	0	0	5.8
259.479	259.486	2010-09-17 11:30:00	2010-09-17 11:39:59				0.02195	264	0.084	0.016	0.075	0.0506	0.1117	0.13275	0.06635	0.08975	0.06945	0	0	0	0	5.6
259.486	259.493	2010-09-17 11:39:59	2010-09-17 11:50:00				0.00583	261	0.082	0.016	0.074	0.0432	0.142	0.1557	0.06365	0.0987	0.0875	0	0	0	0	6.3
259.493	259.5	2010-09-17 11:50:00	2010-09-17 12:00:00				0.00882	272	0.08	0.016	0.071	0.0421	0.1641	0.17205	0.0642	0.0979	0.08725	0	0	0	0	5.1
259.5	259.507	2010-09-17 12:00:00	2010-09-17 12:09:59				0.00638	262	0.077	0.016	0.067	0.03505	0.16075	0.1614	0.0635	0.09765	0.0866	0	0	0	0	5.5
259.507	259.514	2010-09-17 12:09:59	2010-09-17 12:20:00				-0.0075	263	0.077	0.019	0.066	0.03495	0.1575	0.1549	0.06425	0.099	0.07945	0	0	0	0	6.4
259.514	259.521	2010-09-17 12:20:00	2010-09-17 12:29:59				-0.00087	264	0.076	0.019	0.065	0.03535	0.1546	0.1493	0.0622	0.0921	0.07605	0	0	0	0	5.6
259.521	259.528	2010-09-17 12:29:59	2010-09-17 12:40:00				0.00288	255	0.076	0.018	0.067	0.03595	0.15335	0.14735	0.06195	0.0859	0.07285	0	0	0	0	4.9
259.528	259.535	2010-09-17 12:40:00	2010-09-17 12:49:59				0.00167	250	0.071	0.019	0.06	0.0355	0.15155	0.1437	0.06465	0.0887	0.06635	0	0	0	0	5
259.535	259.542	2010-09-17 12:49:59	2010-09-17 13:00:00				-0.00073	260	0.068	0.019	0.056	0.03595	0.14975	0.1406	0.06255	0.08945	0.0722	0	0	0	0	5.3
259.542	259.549	2010-09-17 13:00:00	2010-09-17 13:09:59				0.00182	249	0.067	0.02	0.054	0.03775	0.1487	0.1393	0.05795	0.08615	0.0727	0	0	0	0	4.4
259.549	259.556	2010-09-17 13:09:59	2010-09-17 13:20:00				0.00455	250	0.065	0.021	0.052	0.03965	0.14835	0.13735	0.05795	0.08605	0.07285	0	0	0	0	5.3
259.556	259.562	2010-09-17 13:20:00	2010-09-17 13:30:00				-0.00295	249	0.063	0.022	0.05	0.04005	0.14775	0.13545	0.0595	0.0863	0.0738	0	0	0	0	4.4
259.562	259.569	2010-09-17 13:30:00	2010-09-17 13:39:59				-9e-05	251	0.062	0.021	0.049	0.04055	0.14615	0.1331	0.04875	0.07995	0.0755	0	0	0	0	4.4
259.569	259.576	2010-09-17 13:39:59	2010-09-17 13:50:00				0.0074	256	0.061	0.021	0.049	0.0414	0.1105	0.0888	0.0485	0.0625	0.0566	0	0	0	0	5
259.576	259.583	2010-09-17 13:50:00	2010-09-17 13:59:59				-0.00021	257	0.061	0.021	0.049	0.04115	0.07255	0.0431	0.0489	0.06345	0.05795	0	0	0	0	5
259.583	259.59	2010-09-17 13:59:59	2010-09-17 14:10:00				-9e-05	261	0.059	0.022	0.048	0.0432	0.07425	0.0419	0.0482	0.06405	0.0595	0	0	0	0	4.7
259.59	259.597	2010-09-17 14:10:00	2010-09-17 14:19:59				-0.0009	255	0.055	0.022	0.045	0.0482	0.0771	0.056	0.0454	0.0585	0.05895	0	0	0	0	6
259.597	259.604	2010-09-17 14:19:59	2010-09-17 14:30:00				0.00303	261	0.053	0.022	0.042	0.0477	0.0757	0.05855	0.0441	0.05355	0.05805	0	0	0	0	4.8
259.604	259.611	2010-09-17 14:30:00	2010-09-17 14:39:59				0.00287	254	0.051	0.022	0.043	0.05675	0.07315	0.0654	0.04215	0.0496	0.06005	0	0	0	0	4.5
259.611	259.618	2010-09-17 14:39:59	2010-09-17 14:50:00				0.00138	251	0.052	0.021	0.045	0.0561	0.0727	0.06785	0.0363	0.04355	0.06365	0	0	0	0	4.8
259.618	259.625	2010-09-17 14:50:00	2010-09-17 15:00:00				0.00255	258	0.051	0.021	0.044	0.055	0.0725	0.06815	0.0457	0.0433	0.0584	0	0	0	0	4.4
259.625	259.632	2010-09-17 15:00:00	2010-09-17 15:09:59				0.00112	250	0.051	0.024	0.045	0.05545	0.0711	0.0741	0.04865	0.0447	0.0577	0	0	0	0	5.6
259.632	259.639	2010-09-17 15:09:59	2010-09-17 15:20:00				-0.0022	270	0.05	0.025	0.045	0.05965	0.07035	0.0826	0.0509	0.0494	0.05805	0	0	0	0	6.3
259.639	259.646	2010-09-17 15:20:00	2010-09-17 15:29:59				0.00379	265	0.05	0.026	0.045	0.0625	0.0687	0.0853	0.05145	0.0484	0.05935	0	0	0	0	6
259.646	259.653	2010-09-17 15:29:59	2010-09-17 15:40:00				-0.0021	261	0.051	0.026	0.045	0.0624	0.06575	0.08495	0.053	0.0502	0.0599	0	0	0	0	5.2
259.653	259.66	2010-09-17 15:40:00	2010-09-17 15:49:59				-0.006	260	0.052	0.026	0.044	0.06295	0.05655	0.0826	0.05605	0.04855	0.06085	0	0	0	0	4.1
259.66	259.667	2010-09-17 15:49:59	2010-09-17 16:00:00				0.00105	261	0.053	0.027	0.044	0.06375	0.0533	0.08445	0.0568	0.04915	0.0641	0	0	0	0	3.6
259.667	259.674	2010-09-17 16:00:00	2010-09-17 16:09:59				0.01805	265	0.053	0.027	0.045	0.06495	0.0496	0.08575	0.05735	0.04675	0.0597	0	0	0	0	4.8
259.674	259.681	2010-09-17 16:09:59	2010-09-17 16:20:00				0.00175	271	0.051	0.025	0.045	0.06255	0.0435	0.07755	0.0575	0.0452	0.05895	0	0	0	0	4.2
259.681	259.688	2010-09-17 16:20:00	2010-09-17 16:30:00				-0.01077	262	0.048	0.025	0.042	0.06245	0.04475	0.07585	0.0577	0.04515	0.059	0	0	0	0	5
259.688	259.694	2010-09-17 16:30:00	2010-09-17 16:39:59				-0.00159	257	0.044	0.026	0.038	0.0546	0.04465	0.07025	0.05735	0.0467	0.0579	0	0	0	0	5
259.694	259.701	2010-09-17 16:39:59	2010-09-17 16:50:00				0.0005	254	0.047	0.026	0.041	0.0544	0.04245	0.06845	0.0565	0.04775	0.0562	0	0	0	0	5
259.701	259.708	2010-09-17 16:50:00	2010-09-17 16:59:59				0.00159	254	0.057	0.025	0.054	0.0566	0.04055	0.069	0.05005	0.0463	0.0555	0	0	0	0	4.7
259.708	259.715	2010-09-17 16:59:59	2010-09-17 17:10:00				0.00015	254	0.074	0.024	0.07	0.06245	0.0371	0.06885	0.06065	0.0457	0.06625	0	0	0	0	5
259.715	259.722	2010-09-17 17:10:00	2010-09-17 17:19:59				-0.01385	250	0.09	0.023	0.087	0.0612	0.03585	0.0667	0.062	0.0406	0.06915	0	0	0	0	5.4
259.722	259.729	2010-09-17 17:19:59	2010-09-17 17:30:00				0.00342	263	0.098	0.026	0.091	0.06025	0.0443	0.07485	0.0617	0.04405	0.0722	0	0	0	0	5.5
259.729	259.736	2010-09-17 17:30:00	2010-09-17 17:39:59				2e-05	260	0.121	0.028	0.109	0.06175	0.05075	0.0858	0.05985	0.0481	0.0744	0	0	0	0	5.9
259.736	259.743	2010-09-17 17:39:59	2010-09-17 17:50:00				-0.00407	266	0.141	0.029	0.128	0.0644	0.05365	0.09465	0.0615	0.0497	0.0797	0	0	0	0	4.9
259.743	259.75	2010-09-17 17:50:00	2010-09-17 18:00:00		-999		-0.0008	248	0.169	0.029	0.156	0.06815	0.0608	0.1061	0.0622	0.05615	0.0868	0	0	0	0	5.2
259.75	259.757	2010-09-17 18:00:00	2010-09-17 18:09:59		-999		-0.00941	256	0.194	0.028	0.182	0.0672	0.0689	0.11615	0.0667	0.0584	0.09435	0	0	0	0	4.5
259.757	259.764	2010-09-17 18:09:59	2010-09-17 18:20:00		-999		0.001	249	0.214	0.028	0.203	0.06705	0.0716	0.1222	0.06975	0.0586	0.09745	0	0	0	0	4.6
259.764	259.771	2010-09-17 18:20:00	2010-09-17 18:29:59		-999		0.00171	255	0.235	0.028	0.223	0.0669	0.0715	0.1239	0.07235	0.06135	0.103	0	0	0	0	4.4
259.771	259.778	2010-09-17 18:29:59	2010-09-17 18:40:00		-999		-0.00035	261	0.256	0.028	0.245	0.06565	0.07205	0.12375	0.0734	0.0594	0.1027	0	0	0	0	4.4
259.778	259.785	2010-09-17 18:40:00	2010-09-17 18:49:59		-999		-0.00127	255	0.274	0.028	0.263	0.06535	0.0731	0.1236	0.0731	0.05865	0.102	0	0	0	0	4.1
259.785	259.792	2010-09-17 18:49:59	2010-09-17 19:00:00		-999		0.00142	260	0.288	0.028	0.28	0.0633	0.07485	0.1231	0.07185	0.0592	0.10165	0	0	0	0	3.4
259.792	259.799	2010-09-17 19:00:00	2010-09-17 19:09:59		-999		0.00808	256	0.3	0.027	0.293	0.0551	0.07635	0.1194	0.0623	0.0618	0.09465	0	0	0	0	4.8
259.799	259.806	2010-09-17 19:09:59	2010-09-17 19:20:00		-999		-0.00018	262	0.311	0.025	0.303	0.05065	0.07735	0.11575	0.05975	0.06425	0.0923	0	0	0	0	4.4
259.806	259.812	2010-09-17 19:20:00	2010-09-17 19:30:00		-999		0.00077	264	0.319	0.026	0.314	0.0486	0.07345	0.1084	0.05885	0.06335	0.08835	0	0	0	0	3.5
259.812	259.819	2010-09-17 19:30:00	2010-09-17 19:39:59		-999		0.00071	252	0.325	0.028	0.323	0.04595	0.06905	0.1001	0.05915	0.0564	0.08545	0	0	0	0	4
259.819	259.826	2010-09-17 19:39:59	2010-09-17 19:50:00		-999		0.0001	253	0.334	0.032	0.335	0.03985	0.06715	0.091	0.05725	0.05595	0.0827	0	0	0	0	4.8
259.826	259.833	2010-09-17 19:50:00	2010-09-17 19:59:59		-999		0.00096	257	0.341	0.033	0.345	0.0308	0.06035	0.0744	0.06525	0.04885	0.08245	0	0	0	0	4.9
259.833	259.84	2010-09-17 19:59:59	2010-09-17 20:10:00		-999		-0.00678	264	0.351	0.036	0.357	0.0273	0.05225	0.0602	0.06395	0.0479	0.0804	0	0	0	0	4.5
259.84	259.847	2010-09-17 20:10:00	2010-09-17 20:19:59		-999		0.00455	261	0.366	0.041	0.376	0.04465	0.04995	0.07195	0.06255	0.0493	0.0795	0	0	0	0	4.9
259.847	259.854	2010-09-17 20:19:59	2010-09-17 20:30:00		-999		-0.0042	265	0.384	0.043	0.396	0.0589	0.04865	0.08575	0.06155	0.0465	0.07295	0	0	0	0	5.6
259.854	259.861	2010-09-17 20:30:00	2010-09-17 20:39:59		-999		0.00025	276	0.403	0.045	0.417	0.0682	0.0486	0.0956	0.06	0.0477	0.0729	0	0	0	0	5.7
259.861	259.868	2010-09-17 20:39:59	2010-09-17 20:50:00		-999		-0.00138	268	0.422	0.045	0.437	0.0698	0.0496	0.0994	0.06245	0.04755	0.0739	0	0	0	0	5
259.868	259.875	2010-09-17 20:50:00	2010-09-17 21:00:00		-999		-0.00043	267	0.44	0.045	0.455	0.0698	0.04915	0.1006	0.0638	0.0456	0.0748	0	0	0	0	4.5
259.875	259.882	2010-09-17 21:00:00	2010-09-17 21:09:59		-999		0.00425	266	0.457	0.045	0.472	0.0697	0.04875	0.1006	0.0648	0.04105	0.0767	0	0	0	0	5.1
259.882	259.889	2010-09-17 21:09:59	2010-09-17 21:20:00		-999		-0.0059	271	0.473	0.046	0.488	0.07075	0.0484	0.10005	0.0729	0.0424	0.078	0	0	0	0	4.3
259.889	259.896	2010-09-17 21:20:00	2010-09-17 21:29:59		-999		0.00196	275	0.489	0.044	0.505	0.07315	0.0489	0.1	0.0767	0.04555	0.0778	0	0	0	0	3.6
259.896	259.903	2010-09-17 21:29:59	2010-09-17 21:40:00		-999		0.005	258	0.5	0.043	0.518	0.07495	0.0484	0.0992	0.08075	0.051	0.07695	0	0	0	0	3.9
259.903	259.91	2010-09-17 21:40:00	2010-09-17 21:49:59		-999		7e-05	256	0.512	0.042	0.531	0.0762	0.0492	0.09935	0.08085	0.05355	0.07035	0	0	0	0	4.2
259.91	259.917	2010-09-17 21:49:59	2010-09-17 22:00:00		-999		0.002	252	0.52	0.042	0.539	0.07785	0.05025	0.09945	0.07435	0.054	0.0557	0	0	0	0	4.8
259.917	259.924	2010-09-17 22:00:00	2010-09-17 22:09:59		-999		0.00295	258	0.523	0.043	0.546	0.07945	0.04855	0.09665	0.0733	0.05205	0.0509	0	0	0	0	4.9
259.924	259.931	2010-09-17 22:09:59	2010-09-17 22:20:00		-999		0.00713	262	0.526	0.044	0.553	0.0711	0.04675	0.0789	0.0736	0.0503	0.04925	0	0	0	0	4.6
259.931	259.938	2010-09-17 22:20:00	2010-09-17 22:30:00		-999		-0.00298	261	0.528	0.045	0.561	0.06145	0.04595	0.05965	0.07325	0.0503	0.0484	0	0	0	0	4.9
259.938	259.944	2010-09-17 22:30:00	2010-09-17 22:39:59		-999		0.00104	262	0.538	0.045	0.568	0.0531	0.04605	0.04225	0.07405	0.04965	0.0494	0	0	0	0	4.9
259.944	259.951	2010-09-17 22:39:59	2010-09-17 22:50:00		-999		0.0021	262	0.55	0.045	0.578	0.0544	0.04335	0.03545	0.0765	0.04985	0.05675	0	0	0	0	4.7
259.951	259.958	2010-09-17 22:50:00	2010-09-17 22:59:59		-999		0.00859	265	0.561	0.045	0.586	0.05825	0.0411	0.03445	0.08065	0.05045	0.0582	0	0	0	0	4.2
259.958	259.965	2010-09-17 22:59:59	2010-09-17 23:10:00		-999		-0.00371	257	0.573	0.045	0.595	0.06065	0.03865	0.03585	0.08095	0.0509	0.058	0	0	0	0	4.2
259.965	259.972	2010-09-17 23:10:00	2010-09-17 23:19:59		-999		0.00042	261	0.586	0.046	0.606	0.0616	0.0372	0.03665	0.076	0.0466	0.05915	0	0	0	0	3.8
259.972	259.979	2010-09-17 23:19:59	2010-09-17 23:30:00		-999		0.00825	260	0.599	0.047	0.618	0.0616	0.0583	0.06575	0.0734	0.04525	0.06465	0	0	0	0	3.7
259.979	259.986	2010-09-17 23:30:00	2010-09-17 23:39:59		-999		-0.00265	260	0.613	0.046	0.63	0.06365	0.08	0.09475	0.07365	0.03905	0.069	0	0	0	0	3.2
259.986	259.993	2010-09-17 23:39:59	2010-09-17 23:50:00		-999		0.00716	266	0.627	0.043	0.64	0.0687	0.07925	0.0981	0.0765	0.03475	0.0726	0	0	0	0	2.9
259.993	260	2010-09-17 23:50:00	2010-09-18		-999		0.00137	267	0.643	0.041	0.652	0.0717	0.0792	0.09915	0.0799	0.03245	0.0773	0	0	0	0	3
260	260.007	2010-09-18	2010-09-18 00:09:59		-999		-0.00109	259	0.656	0.039	0.662	0.0743	0.08005	0.09945	0.07895	0.0329	0.07405	0	0	0	0	2.6
260.007	260.014	2010-09-18 00:09:59	2010-09-18 00:20:00		-999		-0.0012	260	0.664	0.035	0.668	0.07375	0.08065	0.09965	0.07725	0.03385	0.07235	0	0	0	0	2.8
260.014	260.021	2010-09-18 00:20:00	2010-09-18 00:29:59		-999		0.00125	260	0.665	0.034	0.669	0.074	0.08845	0.1017	0.0853	0.04935	0.0752	0	0	0	0	4.4
260.021	260.028	2010-09-18 00:29:59	2010-09-18 00:40:00		-999		0.00105	259	0.662	0.033	0.666	0.0769	0.09495	0.10245	0.11045	0.0755	0.07605	0	0	0	0	4
260.028	260.035	2010-09-18 00:40:00	2010-09-18 00:49:59		-999		-0.00487	258	0.659	0.036	0.664	0.07735	0.0979	0.1013	0.1106	0.07595	0.07415	0	0	0	0	3.1
260.035	260.042	2010-09-18 00:49:59	2010-09-18 01:00:00		-999		-0.0001	267	0.66	0.036	0.665	0.07715	0.10115	0.10015	0.11045	0.0773	0.07385	0	0	0	0	3.4
260.042	260.049	2010-09-18 01:00:00	2010-09-18 01:09:59		-999		-0.00375	267	0.663	0.036	0.667	0.0773	0.10645	0.1007	0.1277	0.0911	0.0753	0	0	0	0	3.1
260.049	260.056	2010-09-18 01:09:59	2010-09-18 01:20:00		-999		-0.00094	263	0.666	0.036	0.669	0.0791	0.1141	0.102	0.14265	0.10445	0.07495	0	0	0	0	3.1
260.056	260.062	2010-09-18 01:20:00	2010-09-18 01:30:00		-999		0.01847	256	0.671	0.035	0.673	0.0811	0.11155	0.08045	0.1623	0.11885	0.07335	0	0	0	0	2.9
260.062	260.069	2010-09-18 01:30:00	2010-09-18 01:39:59		-999		0.02016	261	0.675	0.035	0.676	0.08255	0.1096	0.05855	0.1893	0.1415	0.0743	0	0	0	0	3.4
260.069	260.076	2010-09-18 01:39:59	2010-09-18 01:50:00		-999		0.0191	260	0.68	0.035	0.68	0.08035	0.1188	0.05735	0.20205	0.15345	0.0729	0	0	0	0	3.7
260.076	260.083	2010-09-18 01:50:00	2010-09-18 01:59:59		-999		0.018	262	0.683	0.036	0.684	0.08025	0.12575	0.05785	0.2217	0.1673	0.0749	0	0	0	0	3
260.083	260.09	2010-09-18 01:59:59	2010-09-18 02:10:00		-999		0.0515	258	0.684	0.037	0.688	0.07835	0.12965	0.05915	0.2406	0.18295	0.0778	0	0	0	0	2.6
260.09	260.097	2010-09-18 02:10:00	2010-09-18 02:19:59		-999		0.08113	256	0.686	0.037	0.694	0.07995	0.1316	0.0584	0.2695	0.21325	0.07925	0	0	0	0	3.3
260.097	260.104	2010-09-18 02:19:59	2010-09-18 02:30:00		-999		0.1266	260	0.688	0.037	0.697	0.08105	0.13055	0.0559	0.29905	0.2472	0.0766	0	0	0	0	2.1
260.104	260.111	2010-09-18 02:30:00	2010-09-18 02:39:59		-999		0.12907	247	0.688	0.041	0.7	0.0783	0.12765	0.05435	0.29965	0.2509	0.07455	0	0	0	0	2.6
260.111	260.118	2010-09-18 02:39:59	2010-09-18 02:50:00		-999		0.10314	247	0.686	0.043	0.7	0.0757	0.12685	0.0553	0.2993	0.2513	0.07085	0	0	0	0	2.6
260.118	260.125	2010-09-18 02:50:00	2010-09-18 03:00:00		-999		0.05518	247	0.685	0.045	0.701	0.0734	0.1261	0.0566	0.29795	0.2513	0.07155	0	0	0	0	2.4
260.125	260.132	2010-09-18 03:00:00	2010-09-18 03:09:59		-999		0.05275	252	0.683	0.046	0.7	0.07195	0.1235	0.05545	0.29475	0.2495	0.0718	0	0	0	0	3.6
260.132	260.139	2010-09-18 03:09:59	2010-09-18 03:20:00		-999		0.0817	247	0.679	0.046	0.697	0.0689	0.1174	0.0525	0.293	0.2473	0.0735	0	0	0	0	4
260.139	260.146	2010-09-18 03:20:00	2010-09-18 03:29:59		-999		0.11429	260	0.676	0.045	0.694	0.065	0.1091	0.04855	0.28555	0.24185	0.0741	0	0	0	0	3.8
260.146	260.153	2010-09-18 03:29:59	2010-09-18 03:40:00		-999		0.0594	262	0.675	0.047	0.693	0.06355	0.1014	0.0449	0.2833	0.24225	0.0732	0	0	0	0	3.8
260.153	260.16	2010-09-18 03:40:00	2010-09-18 03:49:59		-999		0.00937	267	0.669	0.047	0.689	0.06345	0.0944	0.0386	0.2956	0.25265	0.07485	0	0	0	0	4.2
260.16	260.167	2010-09-18 03:49:59	2010-09-18 04:00:00		-999		0.01515	268	0.661	0.049	0.682	0.06265	0.08715	0.0348	0.3114	0.2705	0.07215	0	0	0	0	4.7
260.167	260.174	2010-09-18 04:00:00	2010-09-18 04:09:59		-999		0.0918	264	0.653	0.05	0.675	0.06385	0.08255	0.03055	0.3278	0.2841	0.07565	0	0	0	0	4.1
260.174	260.181	2010-09-18 04:09:59	2010-09-18 04:20:00		-999		0.07357	267	0.647	0.049	0.669	0.06155	0.0813	0.03305	0.33535	0.28515	0.0821	0	0	0	0	4.1
260.181	260.188	2010-09-18 04:20:00	2010-09-18 04:30:00		-999		0.03035	261	0.648	0.048	0.669	0.0591	0.07725	0.034	0.34885	0.28875	0.09075	0	0	0	0	3
260.188	260.194	2010-09-18 04:30:00	2010-09-18 04:39:59		-999		0.12825	250	0.654	0.047	0.674	0.0714	0.0763	0.06675	0.3998	0.3213	0.12495	0	0	0	0	2.9
260.194	260.201	2010-09-18 04:39:59	2010-09-18 04:50:00		-999		0.1669	249	0.656	0.047	0.677	0.0824	0.0797	0.09595	0.4541	0.34915	0.17425	0	0	0	0	2.5
260.201	260.208	2010-09-18 04:50:00	2010-09-18 04:59:59		-999		0.16304	255	0.654	0.049	0.675	0.0823	0.0812	0.1015	0.49955	0.37465	0.205	0	0	0	0	2.8
260.208	260.215	2010-09-18 04:59:59	2010-09-18 05:10:00		-999		0.13493	268	0.65	0.05	0.673	0.08215	0.08395	0.10785	0.53995	0.39845	0.2312	0	0	0	0	2.9
260.215	260.222	2010-09-18 05:10:00	2010-09-18 05:19:59		-999		0.1409	265	0.645	0.05	0.668	0.08135	0.08795	0.11395	0.57255	0.4221	0.246	0	0	0	0	3.3
260.222	260.229	2010-09-18 05:19:59	2010-09-18 05:30:00		-999		0.15605	266	0.642	0.05	0.666	0.0809	0.0909	0.1202	0.5963	0.43875	0.2542	0	0	0	0	3.4
260.229	260.236	2010-09-18 05:30:00	2010-09-18 05:39:59		-999		0.16375	262	0.639	0.053	0.666	0.07745	0.0921	0.12495	0.60245	0.4379	0.2609	0	0	0	0	3.7
260.236	260.243	2010-09-18 05:39:59	2010-09-18 05:50:00		-999		0.15375	260	0.635	0.054	0.663	0.07625	0.09545	0.1265	0.596	0.42825	0.2658	0	0	0	0	3.9
260.243	260.25	2010-09-18 05:50:00	2010-09-18 06:00:00		-999		0.15682	264	0.619	0.059	0.649	0.07335	0.09705	0.12895	0.5893	0.4151	0.27225	0	0	0	0	3.7
260.25	260.257	2010-09-18 06:00:00	2010-09-18 06:09:59		-999		0.15063	262	0.603	0.069	0.634	0.07065	0.09885	0.1302	0.588	0.411	0.2743	0	0	0	0	3.6
260.257	260.264	2010-09-18 06:09:59	2010-09-18 06:20:00		-999		0.1701	268	0.585	0.076	0.619	0.0708	0.10035	0.1305	0.5876	0.4131	0.27335	0	0	0	0	3.5
260.264	260.271	2010-09-18 06:20:00	2010-09-18 06:29:59		-999		0.10712	255	0.566	0.08	0.601	0.0707	0.10265	0.1317	0.56965	0.39355	0.2723	0	0	0	0	4.1
260.271	260.278	2010-09-18 06:29:59	2010-09-18 06:40:00		-999		0.07365	268	0.548	0.081	0.583	0.05995	0.10925	0.1323	0.5361	0.36345	0.2612	0.1818	0	0	1	4
260.278	260.285	2010-09-18 06:40:00	2010-09-18 06:49:59		-999		0.05447	262	0.531	0.08	0.566	0.0977	0.11255	0.16495	0.508	0.3504	0.2346	0	0	0	0	3.7
260.285	260.292	2010-09-18 06:49:59	2010-09-18 07:00:00		-999		0.05421	257	0.515	0.079	0.548	0.1197	0.1192	0.19345	0.4901	0.34965	0.2108	0	0	0	0	3.3
260.292	260.299	2010-09-18 07:00:00	2010-09-18 07:09:59		-999		0.09405	260	0.499	0.079	0.533	0.1201	0.1266	0.2004	0.47885	0.35855	0.18315	0	0	0	0	3.2
260.299	260.306	2010-09-18 07:09:59	2010-09-18 07:20:00		-999		0.10458	260	0.485	0.079	0.519	0.1208	0.13795	0.2111	0.4763	0.3669	0.1683	0	0	0	0	3.8
260.306	260.312	2010-09-18 07:20:00	2010-09-18 07:30:00		-999		0.07478	270	0.47	0.078	0.503	0.1209	0.15345	0.2204	0.4882	0.38555	0.1633	0	0	0	0	3.6
260.312	260.319	2010-09-18 07:30:00	2010-09-18 07:39:59		-999		0.07859	260	0.451	0.077	0.483	0.12415	0.1648	0.2337	0.5194	0.429	0.1549	0	0	0	0	4
260.319	260.326	2010-09-18 07:39:59	2010-09-18 07:50:00		-999		0.1488	261	0.437	0.076	0.469	0.12345	0.1691	0.23865	0.5535	0.46685	0.15145	0	0	0	0	3.7
260.326	260.333	2010-09-18 07:50:00	2010-09-18 07:59:59		-999		0.19592	267	0.424	0.075	0.455	0.1231	0.17335	0.2442	0.56385	0.4806	0.1433	0	0	0	0	3.5
260.333	260.34	2010-09-18 07:59:59	2010-09-18 08:10:00		-999		0.16336	266	0.41	0.075	0.439	0.12275	0.1758	0.24835	0.55875	0.47695	0.1429	0	0	0	0	2.8
260.34	260.347	2010-09-18 08:10:00	2010-09-18 08:19:59		-999		0.21485	252	0.396	0.074	0.425	0.1229	0.17825	0.25415	0.5482	0.4632	0.14775	0	0	0	0	3.3
260.347	260.354	2010-09-18 08:19:59	2010-09-18 08:30:00		-999		0.29017	243	0.375	0.074	0.405	0.12785	0.17835	0.26135	0.5448	0.46	0.15065	0	0	0	0	3.2
260.354	260.361	2010-09-18 08:30:00	2010-09-18 08:39:59		-999		0.27935	255	0.349	0.074	0.381	0.1326	0.1735	0.2578	0.54065	0.4579	0.1571	0	0	0	0	2.7
260.361	260.368	2010-09-18 08:39:59	2010-09-18 08:50:00		-999		0.21788	255	0.325	0.072	0.355	0.11245	0.08375	0.1109	0.5282	0.2222	0.08045	0	0	0	0	3
260.368	260.375	2010-09-18 08:50:00	2010-09-18 09:00:00		-999		0.13655	261	0.303	0.071	0.332	0.11245	0.19615	0.225	0.5069	0.42485	0.1649	0	0	0	0	2.6
260.375	260.382	2010-09-18 09:00:00	2010-09-18 09:09:59		-999		0.10346	245	0.275	0.07	0.304	0.12485	0.20505	0.2322	0.47475	0.39155	0.1699	0	0	0	0	3.2
260.382	260.389	2010-09-18 09:09:59	2010-09-18 09:20:00		-999		0.0697	268	0.247	0.07	0.278	0.12795	0.2118	0.2316	0.4345	0.3537	0.16635	0	0	0	0	2.2
260.389	260.396	2010-09-18 09:20:00	2010-09-18 09:29:59		-999		0.00354	270	0.205	0.07	0.239	0.14195	0.19925	0.22945	0.38635	0.30745	0.16565	0	0	0	0	3.2
260.396	260.403	2010-09-18 09:29:59	2010-09-18 09:40:00		-999		0.00055	273	0.159	0.068	0.194	0.1533	0.18985	0.232	0.32305	0.22745	0.1718	0	0	0	0	2.6
260.403	260.41	2010-09-18 09:40:00	2010-09-18 09:49:59		-999		0.00035	276	0.091	0.067	0.136	0.15755	0.1828	0.233	0.25285	0.14505	0.16755	0	0.2222	0	1	3.1
260.41	260.417	2010-09-18 09:49:59	2010-09-18 10:00:00		-999		0.00259	275	0.082	0.064	0.121	0.16115	0.18245	0.2396	0.2043	0.0961	0.16315	0	0	0	0	2.8
260.417	260.424	2010-09-18 10:00:00	2010-09-18 10:09:59		-999		0.00135	277	0.08	0.053	0.108	0.162	0.18245	0.2411	0.1734	0.0618	0.1598	0	0	0	0	3.5
260.424	260.431	2010-09-18 10:09:59	2010-09-18 10:20:00		-999		0.00558	280	0.077	0.043	0.095	0.1625	0.184	0.2435	0.1531	0.04885	0.1646	0	0	0	0	2.6
260.431	260.438	2010-09-18 10:20:00	2010-09-18 10:30:00		-999		0.0016	282	0.077	0.033	0.088	0.16805	0.1849	0.25	0.1481	0.0464	0.16575	0	0	0	0	2.7
260.438	260.444	2010-09-18 10:30:00	2010-09-18 10:39:59		-999		9e-05	272	0.077	0.026	0.083	0.1828	0.18605	0.2669	0.14235	0.04465	0.15705	0	0	0	0	3.2
260.444	260.451	2010-09-18 10:39:59	2010-09-18 10:50:00		-999		0.0027	271	0.075	0.024	0.08	0.19775	0.18735	0.2738	0.13275	0.05015	0.14735	0	0	0	0	2.7
260.451	260.458	2010-09-18 10:50:00	2010-09-18 10:59:59		-999		-0.00721	263	0.072	0.024	0.075	0.22835	0.15325	0.29285	0.1509	0.0559	0.17045	0	0	0	0	2
260.458	260.465	2010-09-18 10:59:59	2010-09-18 11:10:00		-999		0.00229	272	0.069	0.024	0.071	0.23745	0.143	0.3092	0.15085	0.087	0.19015	0	0	0	0	2
260.465	260.472	2010-09-18 11:10:00	2010-09-18 11:19:59		-999		-0.006	261	0.068	0.024	0.07	0.23845	0.1705	0.3357	0.14885	0.1644	0.23655	0	0	0	0	2.3
260.472	260.479	2010-09-18 11:19:59	2010-09-18 11:30:00		-999		-0.0018	284	0.065	0.024	0.068	0.2305	0.2073	0.35095	0.15455	0.1888	0.2628	0	0	0	0	2.5
260.479	260.486	2010-09-18 11:30:00	2010-09-18 11:39:59		-999		-0.00082	285	0.06	0.024	0.064	0.2225	0.2146	0.34775	0.14985	0.19335	0.26735	0	0	0	0	2.6
260.486	260.493	2010-09-18 11:39:59	2010-09-18 11:50:00		-999		-5e-05	274	0.056	0.024	0.061	0.2224	0.21745	0.3433	0.1467	0.19425	0.2663	0	0	0	0	2.7
260.493	260.5	2010-09-18 11:50:00	2010-09-18 12:00:00		-999		-0.00193	275	0.057	0.024	0.06	0.2209	0.21425	0.3353	0.1471	0.19455	0.2665	0	0	0	0	2.4
260.5	260.507	2010-09-18 12:00:00	2010-09-18 12:09:59		-999		0.00096	251	0.058	0.023	0.061	0.22655	0.2147	0.3349	0.15015	0.1954	0.2701	0	0	0	0	2.1
260.507	260.514	2010-09-18 12:09:59	2010-09-18 12:20:00		-999		0.0038	248	0.057	0.023	0.061	0.23075	0.21195	0.33525	0.15495	0.1951	0.274	0	0	0	0	1.5
260.514	260.521	2010-09-18 12:20:00	2010-09-18 12:29:59		-999		-0.00662	259	0.057	0.024	0.06	0.22445	0.2131	0.3273	0.154	0.19715	0.27635	0	0	0	0	2.8
260.521	260.528	2010-09-18 12:29:59	2010-09-18 12:40:00		-999		0.001	240	0.057	0.024	0.06	0.21125	0.2169	0.3196	0.15285	0.20135	0.27725	0	0	0	0	3.7
260.528	260.535	2010-09-18 12:40:00	2010-09-18 12:49:59		-999		-0.0041	281	0.057	0.025	0.06	0.1935	0.21765	0.31705	0.14795	0.20745	0.2817	0	0	0	0	2.9
260.535	260.542	2010-09-18 12:49:59	2010-09-18 13:00:00		-999		-0.0001	270	0.058	0.027	0.06	0.1449	0.2201	0.29385	0.11795	0.206	0.2659	0	0	0	0	3.2
260.542	260.549	2010-09-18 13:00:00	2010-09-18 13:09:59		-999		-0.00293	268	0.058	0.028	0.059	0.1273	0.21465	0.2749	0.1111	0.1941	0.24855	0	0	0	0	2.6
260.549	260.556	2010-09-18 13:09:59	2010-09-18 13:20:00		-999		-0.00927	275	0.058	0.028	0.059	0.13835	0.17815	0.24695	0.11205	0.13325	0.20385	0	0	0	0	2.5
260.556	260.562	2010-09-18 13:20:00	2010-09-18 13:30:00		-999		-0.00295	267	0.057	0.029	0.058	0.19815	0.1334	0.2635	0.10565	0.1003	0.1705	0	0	0	0	2.5
260.562	260.569	2010-09-18 13:30:00	2010-09-18 13:39:59		-999		0.00342	283	0.055	0.029	0.057	0.23445	0.11915	0.2812	0.0985	0.0946	0.1553	0	0	0	0	3.3
260.569	260.576	2010-09-18 13:39:59	2010-09-18 13:50:00		-999		0.0126	273	0.051	0.028	0.055	0.2328	0.11475	0.2826	0.09945	0.0938	0.1557	0	0	0	0	3.1
260.576	260.583	2010-09-18 13:50:00	2010-09-18 13:59:59		-999		-0.00192	267	0.048	0.028	0.049	0.23305	0.1136	0.28555	0.0983	0.09445	0.1541	0	0	0	0	3
260.583	260.59	2010-09-18 13:59:59	2010-09-18 14:10:00		-999		-0.00229	255	0.046	0.024	0.041	0.22715	0.10595	0.281	0.09395	0.09215	0.1466	0	0	0	0	2.5
260.59	260.597	2010-09-18 14:10:00	2010-09-18 14:19:59		-999		-0.00473	256	0.048	0.022	0.038	0.22315	0.1021	0.275	0.08055	0.091	0.1296	0	0	0	0	2.4
260.597	260.604	2010-09-18 14:19:59	2010-09-18 14:30:00		-999		0.00281	247	0.048	0.022	0.039	0.2245	0.09645	0.2768	0.075	0.1015	0.1305	0	0	0	0	2.6
260.604	260.611	2010-09-18 14:30:00	2010-09-18 14:39:59		-999		0.00297	233	0.05	0.021	0.041	0.22365	0.08765	0.27065	0.07525	0.09615	0.1268	0	0	0	0	1.6
260.611	260.618	2010-09-18 14:39:59	2010-09-18 14:50:00		-999		-0.00368	265	0.055	0.022	0.045	0.2211	0.08535	0.26475	0.0779	0.0798	0.1166	0	0	0	0	3.1
260.618	260.625	2010-09-18 14:50:00	2010-09-18 15:00:00		-999		-0.00075	261	0.057	0.023	0.046	0.21945	0.081	0.25935	0.07665	0.08135	0.11225	0	0	0	0	3.3
260.625	260.632	2010-09-18 15:00:00	2010-09-18 15:09:59		-999		0.00354	276	0.063	0.023	0.053	0.2162	0.07905	0.2535	0.0775	0.0858	0.10795	0	0	0	0	2.5
260.632	260.639	2010-09-18 15:09:59	2010-09-18 15:20:00		-999		-0.0015	262	0.068	0.024	0.063	0.2086	0.0766	0.2435	0.0752	0.08535	0.10385	0	0	0	0	3.6
260.639	260.646	2010-09-18 15:20:00	2010-09-18 15:29:59		-999		0.00154	257	0.072	0.024	0.068	0.14455	0.07645	0.191	0.06175	0.0877	0.09655	0	0	0	0	3.2
260.646	260.653	2010-09-18 15:29:59	2010-09-18 15:40:00		-999		0.00646	259	0.08	0.024	0.078	0.09515	0.08235	0.16025	0.06235	0.08805	0.0995	0	0	0	0	3.3
260.653	260.66	2010-09-18 15:40:00	2010-09-18 15:49:59		-999		-0.00417	264	0.085	0.025	0.082	0.09275	0.08575	0.16425	0.0605	0.0864	0.0983	0	0	0	0	3.7
260.66	260.667	2010-09-18 15:49:59	2010-09-18 16:00:00		-999		-0.0091	254	0.092	0.025	0.09	0.14845	0.0842	0.20305	0.06205	0.0854	0.1008	0	0	0	0	3.1
260.667	260.674	2010-09-18 16:00:00	2010-09-18 16:09:59		-999		0.00108	253	0.099	0.025	0.1	0.23605	0.08625	0.2733	0.0646	0.0864	0.09955	0	0	0	0	2.8
260.674	260.681	2010-09-18 16:09:59	2010-09-18 16:20:00		-999		-0.00106	265	0.114	0.025	0.116	0.32375	0.0886	0.35155	0.08345	0.086	0.1043	0	0	0	0	3.4
260.681	260.688	2010-09-18 16:20:00	2010-09-18 16:30:00		-999		-0.00543	261	0.124	0.024	0.126	0.4001	0.08885	0.42485	0.105	0.0706	0.0964	0	0	0	0	2.3
260.688	260.694	2010-09-18 16:30:00	2010-09-18 16:39:59		-999		0.00204	270	0.146	0.024	0.146	0.4345	0.0884	0.4593	0.1052	0.06575	0.09595	0	0	0	0	3.5
260.694	260.701	2010-09-18 16:39:59	2010-09-18 16:50:00		-999		-0.0042	263	0.176	0.024	0.175	0.47745	0.1135	0.4958	0.1044	0.06545	0.095	0	0	0	0	3.2
260.701	260.708	2010-09-18 16:50:00	2010-09-18 16:59:59		-999		0.00092	244	0.203	0.021	0.201	0.50395	0.1321	0.5096	0.105	0.0753	0.0972	0	0	0	0	3.6
260.708	260.715	2010-09-18 16:59:59	2010-09-18 17:10:00		-999		-0.00265	278	0.229	0.021	0.227	0.5202	0.1344	0.5181	0.10645	0.08025	0.09855	0	0	0	0	3.5
260.715	260.722	2010-09-18 17:10:00	2010-09-18 17:19:59		-999		0.00313	286	0.254	0.02	0.251	0.5284	0.13335	0.5246	0.1119	0.08065	0.1006	0	0	0	0	3.1
260.722	260.729	2010-09-18 17:19:59	2010-09-18 17:30:00		-999		0.02337	260	0.278	0.019	0.275	0.53345	0.13425	0.5317	0.1158	0.07835	0.0948	0	0	0	0	3.1
260.729	260.736	2010-09-18 17:30:00	2010-09-18 17:39:59		-999		0.00387	278	0.3	0.019	0.295	0.53735	0.132	0.5364	0.12095	0.07555	0.09235	0	0	0	0	3
260.736	260.743	2010-09-18 17:39:59	2010-09-18 17:50:00		-999		0.00555	283	0.32	0.021	0.314	0.5382	0.13125	0.538	0.12105	0.0763	0.094	0	0	0	0	2.8
260.743	260.75	2010-09-18 17:50:00	2010-09-18 18:00:00		-999		0.0013	272	0.34	0.022	0.332	0.52585	0.13675	0.5271	0.1214	0.0762	0.0966	0	0	0	0	3.2
260.75	260.757	2010-09-18 18:00:00	2010-09-18 18:09:59		-999		-0.00254	257	0.359	0.022	0.351	0.49335	0.1368	0.4973	0.12025	0.07445	0.0975	0	0	0	0	2.8
260.757	260.764	2010-09-18 18:09:59	2010-09-18 18:20:00		-999		0.001	265	0.379	0.022	0.372	0.4416	0.13585	0.4471	0.10465	0.07245	0.08915	0	0	0	0	2.7
260.764	260.771	2010-09-18 18:20:00	2010-09-18 18:29:59		-999		0.00187	275	0.398	0.022	0.391	0.3725	0.13335	0.37435	0.0877	0.06885	0.079	0	0	0	0	2.8
260.771	260.778	2010-09-18 18:29:59	2010-09-18 18:40:00		-999		0.00235	266	0.413	0.022	0.407	0.3321	0.1317	0.3294	0.08735	0.06835	0.07785	0	0	0	0	3.2
260.778	260.785	2010-09-18 18:40:00	2010-09-18 18:49:59		-999		0.0037	266	0.424	0.026	0.415	0.26495	0.1052	0.2684	0.08655	0.06945	0.07755	0	0	0	0	2.8
260.785	260.792	2010-09-18 18:49:59	2010-09-18 19:00:00		-999		0.001	267	0.436	0.027	0.427	0.21035	0.08275	0.2375	0.0841	0.0549	0.07485	0	0	0	0	3.1
260.792	260.799	2010-09-18 19:00:00	2010-09-18 19:09:59		-999		0.00198	265	0.446	0.027	0.436	0.1639	0.0735	0.211	0.07905	0.0425	0.07325	0	0	0	0	3.1
260.799	260.806	2010-09-18 19:09:59	2010-09-18 19:20:00		-999		0.00596	265	0.456	0.025	0.446	0.13075	0.07235	0.18645	0.0707	0.04265	0.0697	0	0	0	0	3.1
260.806	260.812	2010-09-18 19:20:00	2010-09-18 19:30:00		-999		0.00267	267	0.467	0.025	0.457	0.102	0.06935	0.1578	0.06195	0.0405	0.06605	0	0	0	0	3
260.812	260.819	2010-09-18 19:30:00	2010-09-18 19:39:59		-999		0.00071	266	0.477	0.025	0.466	0.07805	0.06615	0.13045	0.05345	0.05005	0.07545	0	0	0	0	2.8
260.819	260.826	2010-09-18 19:39:59	2010-09-18 19:50:00		-999		0.0068	270	0.488	0.026	0.477	0.077	0.0679	0.12945	0.05315	0.0737	0.09445	0	0	0	0	2.9
260.826	260.833	2010-09-18 19:50:00	2010-09-18 19:59:59		-999		-0.00066	265	0.499	0.027	0.486	0.07965	0.0609	0.123	0.04865	0.08265	0.098	0	0	0	0	3.4
260.833	260.84	2010-09-18 19:59:59	2010-09-18 20:10:00		-999		-0.00088	264	0.509	0.027	0.497	0.08135	0.05735	0.11345	0.0459	0.08355	0.09765	0	0	0	0	3.6
260.84	260.847	2010-09-18 20:10:00	2010-09-18 20:19:59		-999		0.0026	266	0.518	0.027	0.504	0.08015	0.05345	0.10495	0.0459	0.0853	0.09415	0	0	0	0	3.9
260.847	260.854	2010-09-18 20:19:59	2010-09-18 20:30:00		-999		-0.00651	266	0.526	0.027	0.512	0.08225	0.0534	0.1072	0.04355	0.08605	0.09265	0	0	0	0	3.3
260.854	260.861	2010-09-18 20:30:00	2010-09-18 20:39:59		-999		0.00685	253	0.533	0.028	0.519	0.08695	0.0543	0.10795	0.0467	0.0873	0.0925	0	0	0	0	3
260.861	260.868	2010-09-18 20:39:59	2010-09-18 20:50:00		-999		0.0081	262	0.536	0.031	0.521	0.08985	0.05435	0.10965	0.04905	0.0868	0.0924	0	0	0	0	3.8
260.868	260.875	2010-09-18 20:50:00	2010-09-18 21:00:00		-999		0.0031	265	0.539	0.032	0.523	0.0936	0.05545	0.10995	0.0504	0.08695	0.094	0	0	0	0	3.6
260.875	260.882	2010-09-18 21:00:00	2010-09-18 21:09:59		-999		-0.00121	263	0.541	0.034	0.523	0.0972	0.0552	0.11265	0.0505	0.0871	0.0989	0	0	0	0	3.6
260.882	260.889	2010-09-18 21:09:59	2010-09-18 21:20:00		-999		0.0028	266	0.542	0.036	0.523	0.1023	0.0551	0.1164	0.0548	0.08645	0.0989	0	0	0	0	3.6
260.889	260.896	2010-09-18 21:20:00	2010-09-18 21:29:59		-999		-0.00016	263	0.542	0.038	0.522	0.10655	0.05555	0.11855	0.0592	0.0882	0.0999	0	0	0	0	4
260.896	260.903	2010-09-18 21:29:59	2010-09-18 21:40:00		-999		0.00268	262	0.543	0.038	0.522	0.1164	0.0618	0.1211	0.0584	0.08375	0.0913	0	0	0	0	3.5
260.903	260.91	2010-09-18 21:40:00	2010-09-18 21:49:59		-999		0.01257	257	0.544	0.044	0.521	0.1232	0.06315	0.11295	0.0597	0.0641	0.07265	0	0	0	0	3.5
260.91	260.917	2010-09-18 21:49:59	2010-09-18 22:00:00		-999		0.00677	262	0.545	0.047	0.52	0.11995	0.0606	0.1021	0.06055	0.0521	0.0606	0	0	0	0	3.2
260.917	260.924	2010-09-18 22:00:00	2010-09-18 22:09:59		-999		-0.00243	266	0.545	0.047	0.52	0.115	0.0605	0.10035	0.0607	0.05875	0.06665	0	0	0	0	3.3
260.924	260.931	2010-09-18 22:09:59	2010-09-18 22:20:00		-999		-0.00414	261	0.543	0.048	0.517	0.11235	0.061	0.099	0.06155	0.0584	0.07215	0	0	0	0	2.6
260.931	260.938	2010-09-18 22:20:00	2010-09-18 22:30:00		-999		-0.00435	263	0.541	0.048	0.514	0.1118	0.0607	0.0947	0.068	0.0588	0.07505	0	0	0	0	2.4
260.938	260.944	2010-09-18 22:30:00	2010-09-18 22:39:59		-999		0.00492	263	0.541	0.049	0.513	0.11285	0.0598	0.0957	0.0749	0.1101	0.1293	0	0	0	0	2.1
260.944	260.951	2010-09-18 22:39:59	2010-09-18 22:50:00		-999		0.0003	273	0.544	0.049	0.516	0.1147	0.05985	0.0994	0.08605	0.1608	0.18435	0	0	0	0	2.5
260.951	260.958	2010-09-18 22:50:00	2010-09-18 22:59:59		-999		-0.00067	276	0.547	0.051	0.517	0.1159	0.05835	0.10755	0.09305	0.16305	0.19385	0	0	0	0	2.8
260.958	260.965	2010-09-18 22:59:59	2010-09-18 23:10:00		-999		0.0051	280	0.549	0.052	0.521	0.118	0.0593	0.11175	0.1009	0.16415	0.199	0	0	0	0	3.1
260.965	260.972	2010-09-18 23:10:00	2010-09-18 23:19:59		-999		-0.00453	286	0.552	0.053	0.523	0.12295	0.0608	0.1147	0.1165	0.1644	0.20505	0	0	0	0	2.7
260.972	260.979	2010-09-18 23:19:59	2010-09-18 23:30:00		-999		0.00611	281	0.554	0.054	0.527	0.1272	0.0638	0.11495	0.13595	0.1652	0.21065	0	0	0	0	2.4
260.979	260.986	2010-09-18 23:30:00	2010-09-18 23:39:59		-999		-0.00588	281	0.56	0.056	0.531	0.1331	0.0602	0.1199	0.15305	0.166	0.21395	0	0	0	0	2.8
260.986	260.993	2010-09-18 23:39:59	2010-09-18 23:50:00		-999		0.00407	286	0.565	0.056	0.535	0.14145	0.05425	0.1227	0.1649	0.16745	0.21705	0	0	0	0	2.3
260.993	261	2010-09-18 23:50:00	2010-09-19		-999		0.0011	292	0.569	0.056	0.538	0.1539	0.0511	0.1278	0.1781	0.16875	0.22185	0	0	0	0	2.8
261	261.007	2010-09-19	2010-09-19 00:09:59		-999		0.00746	285	0.575	0.057	0.543	0.16515	0.0511	0.1374	0.18975	0.16715	0.22485	0	0	0	0	2.1
261.007	261.014	2010-09-19 00:09:59	2010-09-19 00:20:00		-999		-0.0047	305	0.58	0.058	0.547	0.17135	0.0509	0.1459	0.19545	0.1663	0.22935	0	0	0	0	1.7
261.014	261.021	2010-09-19 00:20:00	2010-09-19 00:29:59		-999		0.00513	292	0.585	0.059	0.551	0.1759	0.0512	0.1535	0.2011	0.16615	0.2333	0	0	0	0	2
261.021	261.028	2010-09-19 00:29:59	2010-09-19 00:40:00		-999		-0.00347	298	0.593	0.06	0.557	0.1771	0.05115	0.158	0.20545	0.11745	0.20735	0	0	0	0	1.8
261.028	261.035	2010-09-19 00:40:00	2010-09-19 00:49:59		-999		0.00158	300	0.597	0.06	0.562	0.179	0.05115	0.1597	0.20405	0.06915	0.17665	0	0	0	0	1.4
261.035	261.042	2010-09-19 00:49:59	2010-09-19 01:00:00		-999		0.0005	294	0.604	0.063	0.566	0.1788	0.0503	0.156	0.2062	0.0643	0.1693	0	0	0	0	1.5
261.042	261.049	2010-09-19 01:00:00	2010-09-19 01:09:59		-999		0.00995	294	0.607	0.066	0.567	0.17865	0.04945	0.1527	0.20585	0.0597	0.1669	0	0	0	0	1.8
261.049	261.056	2010-09-19 01:09:59	2010-09-19 01:20:00		-999		-0.00992	300	0.612	0.065	0.572	0.17705	0.04825	0.1511	0.2046	0.05825	0.1671	0	0	0	0	2.2
261.056	261.062	2010-09-19 01:20:00	2010-09-19 01:30:00		-999		-0.00245	311	0.616	0.066	0.576	0.1765	0.0526	0.16115	0.2024	0.05555	0.16835	0	0	0	0	2
261.062	261.069	2010-09-19 01:30:00	2010-09-19 01:39:59		-999		0.00387	312	0.62	0.067	0.579	0.17075	0.05035	0.15815	0.2018	0.05105	0.1751	0	0	0	0	1.7
261.069	261.076	2010-09-19 01:39:59	2010-09-19 01:50:00		-999		0.0017	313	0.622	0.062	0.583	0.1625	0.0442	0.1561	0.2038	0.0458	0.1847	0	0	0	0	1.4
261.076	261.083	2010-09-19 01:50:00	2010-09-19 01:59:59		-999		0.00167	320	0.623	0.06	0.585	0.1554	0.0422	0.15295	0.20355	0.0397	0.18985	0	0	0	0	1.2
261.083	261.09	2010-09-19 01:59:59	2010-09-19 02:10:00		-999		0.0022	313	0.623	0.061	0.584	0.1479	0.0413	0.14805	0.2023	0.03505	0.1933	0	0	0	0	1.6
261.09	261.097	2010-09-19 02:10:00	2010-09-19 02:19:59		-999		-0.01218	295	0.623	0.061	0.584	0.1437	0.04095	0.1427	0.2044	0.0353	0.1959	0	0	0	0	1.9
261.097	261.104	2010-09-19 02:19:59	2010-09-19 02:30:00		-999		0.00045	311	0.622	0.061	0.583	0.14065	0.04045	0.1395	0.2027	0.03385	0.19785	0	0	0	0	2
261.104	261.111	2010-09-19 02:30:00	2010-09-19 02:39:59		-999		0.001	307	0.622	0.06	0.584	0.13975	0.03965	0.1373	0.20205	0.0343	0.19845	0	0	0	0	1.6
261.111	261.118	2010-09-19 02:39:59	2010-09-19 02:50:00		-999		0.00411	300	0.625	0.058	0.588	0.13585	0.0398	0.1342	0.20195	0.0346	0.19925	0	0	0	0	1.8
261.118	261.125	2010-09-19 02:50:00	2010-09-19 03:00:00		-999		0.0015	294	0.626	0.056	0.59	0.1326	0.0397	0.1333	0.19945	0.03615	0.2008	0	0	0	0	1.6
261.125	261.132	2010-09-19 03:00:00	2010-09-19 03:09:59		-999		0.00117	300	0.626	0.055	0.593	0.1281	0.0393	0.13005	0.19835	0.03905	0.1995	0	0	0	0	1.7
261.132	261.139	2010-09-19 03:09:59	2010-09-19 03:20:00		-999		0.0097	302	0.624	0.054	0.594	0.12205	0.04005	0.12575	0.1919	0.0395	0.1965	0	0	0	0	1.7
261.139	261.146	2010-09-19 03:20:00	2010-09-19 03:29:59		-999		0.01925	307	0.624	0.053	0.595	0.11525	0.02725	0.1112	0.18195	0.0359	0.19175	0	0	0	0	1.7
261.146	261.153	2010-09-19 03:29:59	2010-09-19 03:40:00		-999		-0.00234	300	0.623	0.051	0.596	0.11095	0.0227	0.11035	0.1724	0.0328	0.18575	0	0	0	0	1.6
261.153	261.16	2010-09-19 03:40:00	2010-09-19 03:49:59		-999		0.00158	308	0.623	0.05	0.597	0.1105	0.0255	0.10765	0.1652	0.0331	0.17865	0	0	0	0	1.2
261.16	261.167	2010-09-19 03:49:59	2010-09-19 04:00:00		-999		0.00279	296	0.623	0.05	0.597	0.1117	0.02475	0.1089	0.16115	0.03465	0.1784	0	0	0	0	1.3
261.167	261.174	2010-09-19 04:00:00	2010-09-19 04:09:59		-999		0.02325	274	0.62	0.049	0.594	0.1185	0.0271	0.1106	0.1625	0.034	0.1803	0	0	0	0	2.2
261.174	261.181	2010-09-19 04:09:59	2010-09-19 04:20:00		-999		0.01443	267	0.619	0.047	0.595	0.1291	0.03195	0.11315	0.16625	0.0339	0.182	0	0	0	0	2.7
261.181	261.188	2010-09-19 04:20:00	2010-09-19 04:30:00		-999		0.0019	276	0.619	0.048	0.595	0.14805	0.03635	0.1233	0.17105	0.0336	0.185	0	0	0	0	3
261.188	261.194	2010-09-19 04:30:00	2010-09-19 04:39:59		-999		-0.00596	272	0.617	0.051	0.591	0.1679	0.0368	0.1438	0.17565	0.03405	0.1896	0	0	0	0	3.8
261.194	261.201	2010-09-19 04:39:59	2010-09-19 04:50:00		-999		0.0059	277	0.617	0.051	0.591	0.1864	0.0376	0.1615	0.18145	0.0331	0.19235	0	0	0	0	3.9
261.201	261.208	2010-09-19 04:50:00	2010-09-19 04:59:59		-999		-0.00359	266	0.616	0.048	0.591	0.20495	0.03945	0.17645	0.1884	0.0311	0.1952	0	0	0	0	3.9
261.208	261.215	2010-09-19 04:59:59	2010-09-19 05:10:00		-999		0.00119	267	0.616	0.043	0.593	0.21855	0.03975	0.18955	0.1979	0.0295	0.1996	0	0	0	0	3.8
261.215	261.222	2010-09-19 05:10:00	2010-09-19 05:19:59		-999		-0.00082	274	0.615	0.043	0.594	0.23025	0.03865	0.201	0.20525	0.02905	0.20375	0	0	0	0	3.6
261.222	261.229	2010-09-19 05:19:59	2010-09-19 05:30:00		-999		-0.00719	274	0.615	0.04	0.597	0.2408	0.0397	0.2102	0.2096	0.0286	0.20775	0	0	0	0	3.5
261.229	261.236	2010-09-19 05:30:00	2010-09-19 05:39:59		-999		0.00035	279	0.614	0.039	0.598	0.2503	0.04275	0.21685	0.21115	0.02925	0.20755	0	0	0	0	3.8
261.236	261.243	2010-09-19 05:39:59	2010-09-19 05:50:00		-999		-0.01296	273	0.616	0.039	0.602	0.2603	0.0456	0.22425	0.20805	0.0318	0.20595	0	0	0	0	4.2
261.243	261.25	2010-09-19 05:50:00	2010-09-19 06:00:00		-999		-0.0081	271	0.616	0.045	0.606	0.26895	0.0468	0.2315	0.20195	0.03265	0.19955	0	0	0	0	4.1
261.25	261.257	2010-09-19 06:00:00	2010-09-19 06:09:59		-999		0.00225	266	0.617	0.059	0.613	0.2765	0.04895	0.2373	0.19465	0.0364	0.1898	0	0	0	0	4
261.257	261.264	2010-09-19 06:09:59	2010-09-19 06:20:00		-999		-0.0032	269	0.618	0.068	0.62	0.28575	0.0526	0.2438	0.1854	0.0362	0.1807	0	0	0	0	3.8
261.264	261.271	2010-09-19 06:20:00	2010-09-19 06:29:59		-999		0.00683	271	0.62	0.076	0.626	0.2905	0.05275	0.24825	0.1794	0.039	0.1721	0	0	0	0	4.4
261.271	261.278	2010-09-19 06:29:59	2010-09-19 06:40:00		-999		-0.00486	280	0.62	0.08	0.63	0.29125	0.05315	0.24845	0.17145	0.0415	0.15885	0	0	0	0	4.6
261.278	261.285	2010-09-19 06:40:00	2010-09-19 06:49:59		-999		0.01333	277	0.62	0.084	0.634	0.28985	0.05265	0.24915	0.16595	0.0441	0.15025	0	0	0	0	4.5
261.285	261.292	2010-09-19 06:49:59	2010-09-19 07:00:00		-999		-0.00302	278	0.62	0.086	0.636	0.28655	0.05225	0.24755	0.1589	0.04515	0.14155	0	0	0	0	4.6
261.292	261.299	2010-09-19 07:00:00	2010-09-19 07:09:59		-999		0.01132	275	0.617	0.086	0.635	0.2852	0.05285	0.24705	0.1449	0.0445	0.1305	0	0	0	0	4.1
261.299	261.306	2010-09-19 07:09:59	2010-09-19 07:20:00		-999		-0.01057	271	0.617	0.086	0.635	0.28115	0.0541	0.2474	0.1329	0.0466	0.11915	0	0	0	0	3.9
261.306	261.312	2010-09-19 07:20:00	2010-09-19 07:30:00		-999		-0.00285	273	0.613	0.086	0.631	0.2735	0.0649	0.24675	0.1262	0.0506	0.10815	0	0	0	0	4
261.312	261.319	2010-09-19 07:30:00	2010-09-19 07:39:59		-999		0.00541	273	0.605	0.086	0.623	0.26275	0.09305	0.2486	0.1191	0.05	0.0997	0	0	0	0	4.1
261.319	261.326	2010-09-19 07:39:59	2010-09-19 07:50:00		-999		-0.0007	281	0.594	0.085	0.614	0.24905	0.1124	0.24885	0.1175	0.05275	0.09135	0	0	0	0	4.4
261.326	261.333	2010-09-19 07:50:00	2010-09-19 07:59:59		-999		0.00558	-999	0.583	0.085	0.604	0.2349	0.1266	0.24765	0.1206	0.05905	0.08435	0	0	0	0	4.5
261.333	261.34	2010-09-19 07:59:59	2010-09-19 08:10:00		-999		0.00329	328	0.571	0.085	0.593	0.21895	0.1342	0.24505	0.1212	0.065	0.0799	0	0	0	0	3.7
261.34	261.347	2010-09-19 08:10:00	2010-09-19 08:19:59		-999		0.00323	258	0.557	0.085	0.579	0.19885	0.1352	0.2403	0.1186	0.0676	0.0731	0	0	0	0	2.5
261.347	261.354	2010-09-19 08:19:59	2010-09-19 08:30:00		-999		0.00779	242	0.542	0.085	0.566	0.17555	0.13565	0.23135	0.11325	0.0803	0.0823	0	0	0	0	1.9
261.354	261.361	2010-09-19 08:30:00	2010-09-19 08:39:59		-999		0.00515	239	0.525	0.082	0.553	0.1527	0.136	0.2182	0.1061	0.09515	0.0988	0	0	0	0	2.3
261.361	261.368	2010-09-19 08:39:59	2010-09-19 08:50:00		-999		0.00496	235	0.508	0.081	0.539	0.1314	0.13855	0.2064	0.09755	0.09455	0.0966	0	0	0	0	1.9
261.368	261.375	2010-09-19 08:50:00	2010-09-19 09:00:00		-999		0.00098	229	0.489	0.08	0.523	0.10865	0.1408	0.19725	0.08955	0.09485	0.09345	0	0	0	0	3.1
261.375	261.382	2010-09-19 09:00:00	2010-09-19 09:09:59		-999		0.00354	228	0.472	0.08	0.507	0.08265	0.1404	0.1857	0.08685	0.0949	0.09175	0	0	0	0	3
261.382	261.389	2010-09-19 09:09:59	2010-09-19 09:20:00		-999		-0.0008	229	0.454	0.08	0.489	0.06085	0.13985	0.1729	0.08415	0.09405	0.09025	0	0	0	0	2.7
261.389	261.396	2010-09-19 09:20:00	2010-09-19 09:29:59		-999		-0.00229	226	0.434	0.081	0.47	0.0518	0.13475	0.16155	0.07925	0.092	0.0893	0	0	0	0	3.1
261.396	261.403	2010-09-19 09:29:59	2010-09-19 09:40:00		-999		0.00035	225	0.415	0.083	0.453	0.05245	0.1158	0.1472	0.076	0.0925	0.08705	0	0	0	0	3.3
261.403	261.41	2010-09-19 09:40:00	2010-09-19 09:49:59		-999		0.002	238	0.392	0.086	0.43	0.05245	0.09595	0.132	0.07115	0.09015	0.08545	0	0	0	0	3.2
261.41	261.417	2010-09-19 09:49:59	2010-09-19 10:00:00		-999		0.0037	234	0.373	0.084	0.408	0.0521	0.07735	0.1144	0.0621	0.0857	0.0855	0	0	0	0	3.5
261.417	261.424	2010-09-19 10:00:00	2010-09-19 10:09:59		-999		-0.00253	225	0.352	0.075	0.381	0.05215	0.06215	0.09985	0.05175	0.08555	0.09195	0	0	0	0	4.3
261.424	261.431	2010-09-19 10:09:59	2010-09-19 10:20:00		-999		-0.01382	225	0.332	0.067	0.355	0.04595	0.0554	0.0861	0.0472	0.08815	0.09935	0	0	0	0	4.4
261.431	261.438	2010-09-19 10:20:00	2010-09-19 10:30:00		-999		-0.00705	229	0.31	0.058	0.326	0.0383	0.05335	0.0745	0.04065	0.07685	0.08835	0	0	0	0	4.4
261.438	261.444	2010-09-19 10:30:00	2010-09-19 10:39:59		-999		0.00142	225	0.288	0.053	0.298	0.033	0.0544	0.06885	0.0432	0.0592	0.07135	0	0	0	0	4.1
261.444	261.451	2010-09-19 10:39:59	2010-09-19 10:50:00		-999		0	231	0.26	0.049	0.264	0.0293	0.04805	0.0592	0.04745	0.059	0.07435	0	0	0	0	4.3
261.451	261.458	2010-09-19 10:50:00	2010-09-19 10:59:59		-999		-0.00454	230	0.23	0.049	0.23	0.032	0.0418	0.05295	0.05215	0.05725	0.0795	0	0	0	0	4.6
261.458	261.465	2010-09-19 10:59:59	2010-09-19 11:10:00		-999		-0.00342	215	0.2	0.051	0.198	0.02835	0.04265	0.0517	0.0524	0.0561	0.08065	0	0	0	0	4.9
261.465	261.472	2010-09-19 11:10:00	2010-09-19 11:19:59		-999		-0.00202	225	0.163	0.052	0.159	0.02865	0.04315	0.052	0.0526	0.05735	0.0811	0	0	0	0	5.5
261.472	261.479	2010-09-19 11:19:59	2010-09-19 11:30:00	NCE0.3			-0.00064	225	0.125	0.054	0.122	0.02945	0.0463	0.0539	0.05265	0.05855	0.08245	0	0	0	0	4.1
261.479	261.486	2010-09-19 11:30:00	2010-09-19 11:39:59	NCE0.3			0.00205	229	0.097	0.055	0.093	0.02845	0.04705	0.0555	0.05295	0.0583	0.08405	0	0	0	0	5.3
261.486	261.493	2010-09-19 11:39:59	2010-09-19 11:50:00	NCE0.3			-0.00294	227	0.081	0.056	0.076	0.02795	0.04715	0.05415	0.05415	0.058	0.08485	0	0	0	0	5.4
261.493	261.5	2010-09-19 11:50:00	2010-09-19 12:00:00	NCE0.3			-0.01057	231	0.059	0.057	0.048	0.0345	0.05085	0.0535	0.0528	0.05895	0.0856	0	0	0	0	5.7
261.5	261.507	2010-09-19 12:00:00	2010-09-19 12:09:59	NCE0.3			-0.00137	237	0.052	0.057	0.036	0.03255	0.0508	0.0515	0.0557	0.05435	0.07885	0	0	0	0	5.3
261.507	261.514	2010-09-19 12:09:59	2010-09-19 12:20:00	NCE0.3			0.0053	231	0.053	0.058	0.035	0.03185	0.05085	0.05	0.0552	0.04745	0.069	0	0	0	0	5.9
261.514	261.521	2010-09-19 12:20:00	2010-09-19 12:29:59	NCE0.3			0.00413	232	0.054	0.057	0.037	0.0342	0.0512	0.0479	0.05545	0.04275	0.0625	0	0	0	0	5.7
261.521	261.528	2010-09-19 12:29:59	2010-09-19 12:40:00	NCE0.3			0.00371	227	0.055	0.058	0.037	0.03565	0.05355	0.04805	0.0541	0.04065	0.0582	0	0	0	0	6.3
261.528	261.535	2010-09-19 12:40:00	2010-09-19 12:49:59	NCE0.3			0.0002	223	0.057	0.058	0.037	0.03505	0.054	0.0456	0.0587	0.0444	0.05285	0	0	0	0	6.8
261.535	261.542	2010-09-19 12:49:59	2010-09-19 13:00:00	NCE0.3			0.00388	228	0.057	0.058	0.035	0.0318	0.0539	0.04415	0.05795	0.04595	0.045	0	0	0	0	7.1
261.542	261.549	2010-09-19 13:00:00	2010-09-19 13:09:59	NCE0.3			-0.00245	242	0.057	0.059	0.035	0.03195	0.0538	0.0447	0.05895	0.04615	0.04365	0	0	0	0	5.6
261.549	261.556	2010-09-19 13:09:59	2010-09-19 13:20:00	NCE0.3			0.00355	226	0.057	0.059	0.034	0.0316	0.05545	0.0474	0.06145	0.0438	0.0458	0	0	0	0	7
261.556	261.562	2010-09-19 13:20:00	2010-09-19 13:30:00	NCE0.3			0.005	225	0.059	0.059	0.034	0.0325	0.0537	0.0488	0.0623	0.0422	0.0455	0	0	0	0	5.7
261.562	261.569	2010-09-19 13:30:00	2010-09-19 13:39:59	NCE0.3			0.00371	241	0.059	0.057	0.034	0.0334	0.0589	0.05295	0.06245	0.04205	0.04255	0	0	0	0	3.4
261.569	261.576	2010-09-19 13:39:59	2010-09-19 13:50:00	NCE0.3			0.0015	242	0.058	0.054	0.033	0.0336	0.0594	0.0541	0.06695	0.04805	0.04175	0	0	0	0	3.6
261.576	261.583	2010-09-19 13:50:00	2010-09-19 13:59:59	NCE0.3			-0.00413	241	0.057	0.054	0.035	0.02635	0.05535	0.0536	0.0672	0.05	0.03805	0	0	0	0	3.6
261.583	261.59	2010-09-19 13:59:59	2010-09-19 14:10:00	NCE0.3			0.00159	239	0.057	0.053	0.035	0.0256	0.0561	0.05305	0.0618	0.0469	0.03755	0	0	0	0	3.4
261.59	261.597	2010-09-19 14:10:00	2010-09-19 14:19:59	NCE0.3			0.00108	248	0.056	0.053	0.036	0.0289	0.0556	0.05655	0.06225	0.04735	0.0375	0	0	0	0	3.6
261.597	261.604	2010-09-19 14:19:59	2010-09-19 14:30:00	NCE0.3			-0.00354	259	0.056	0.055	0.037	0.03035	0.0539	0.0613	0.06115	0.04795	0.03805	0	0	0	0	3.6
261.604	261.611	2010-09-19 14:30:00	2010-09-19 14:39:59	NCE0.3			0.0006	252	0.055	0.055	0.037	0.0328	0.0546	0.06495	0.0599	0.04885	0.03775	0	0	0	0	3.2
261.611	261.618	2010-09-19 14:39:59	2010-09-19 14:50:00	NCE0.3			-0.00235	258	0.056	0.054	0.036	0.03255	0.0554	0.06725	0.052	0.04465	0.0381	0	0	0	0	2.9
261.618	261.625	2010-09-19 14:50:00	2010-09-19 15:00:00	NCE0.3			-0.00027	247	0.057	0.053	0.036	0.03435	0.07455	0.09065	0.0464	0.0426	0.03705	0	0	0	0	3.7
261.625	261.632	2010-09-19 15:00:00	2010-09-19 15:09:59	NCE0.3			-0.00016	249	0.062	0.052	0.04	0.0387	0.09625	0.1142	0.0439	0.0429	0.036	0	0	0	0	3.6
261.632	261.639	2010-09-19 15:09:59	2010-09-19 15:20:00	NCE0.3			0.007	229	0.066	0.051	0.042	0.05035	0.1	0.1131	0.0454	0.04295	0.03745	0	0	0	0	4.3
261.639	261.646	2010-09-19 15:20:00	2010-09-19 15:29:59	NCE0.3			0.00029	241	0.07	0.05	0.044	0.05015	0.1062	0.1201	0.0438	0.04335	0.0346	0	0	0	0	4.4
261.646	261.653	2010-09-19 15:29:59	2010-09-19 15:40:00	NCE0.3			0.0056	231	0.074	0.049	0.046	0.0518	0.1039	0.11775	0.0445	0.0446	0.03395	0	0	0	0	4.9
261.653	261.66	2010-09-19 15:40:00	2010-09-19 15:49:59	NCE0.3			0.00258	234	0.077	0.049	0.047	0.05615	0.10415	0.11785	0.0362	0.0379	0.03315	0	0	0	0	5.6
261.66	261.667	2010-09-19 15:49:59	2010-09-19 16:00:00	NCE0.3			0.00739	253	0.082	0.05	0.051	0.0582	0.10355	0.1182	0.03455	0.0343	0.03415	0	0	0	0	3
261.667	261.674	2010-09-19 16:00:00	2010-09-19 16:09:59	NCE0.3			0.0022	253	0.088	0.049	0.059	0.0599	0.1038	0.1174	0.0348	0.033	0.0332	0	0	0	0	3.2
261.674	261.681	2010-09-19 16:09:59	2010-09-19 16:20:00	NCE0.3			0.00105	260	0.094	0.049	0.066	0.0599	0.1059	0.11775	0.03285	0.0353	0.03445	0	0	0	0	3.7
261.681	261.688	2010-09-19 16:20:00	2010-09-19 16:30:00	NCE0.3			-0.00205	250	0.101	0.05	0.071	0.0607	0.1058	0.11685	0.04045	0.0404	0.0336	0	0	0	0	5.4
261.688	261.694	2010-09-19 16:30:00	2010-09-19 16:39:59	NCE0.3			0.00154	266	0.108	0.05	0.078	0.06635	0.10325	0.1186	0.04365	0.04405	0.03405	0	0	0	0	4.5
261.694	261.701	2010-09-19 16:39:59	2010-09-19 16:50:00	NCE0.3			-0.0033	230	0.115	0.05	0.087	0.07235	0.10465	0.1269	0.0448	0.04375	0.03315	0	0	0	0	5.5
261.701	261.708	2010-09-19 16:50:00	2010-09-19 16:59:59	NCE0.3			-0.00375	233	0.131	0.05	0.106	0.0816	0.08915	0.1193	0.0471	0.04365	0.03675	0	0	0	0	6.3
261.708	261.715	2010-09-19 16:59:59	2010-09-19 17:10:00		-999		-0.00271	247	0.153	0.049	0.133	0.09295	0.0706	0.1158	0.05055	0.0491	0.0404	0	0	0	0	4.1
261.715	261.722	2010-09-19 17:10:00	2010-09-19 17:19:59		-999		-0.00923	257	0.177	0.048	0.158	0.0936	0.06465	0.12415	0.0458	0.05185	0.03865	0	0	0	0	4.7
261.722	261.729	2010-09-19 17:19:59	2010-09-19 17:30:00		-999		0.00397	247	0.202	0.047	0.186	0.09635	0.05315	0.11905	0.0475	0.05175	0.0401	0	0	0	0	3.9
261.729	261.736	2010-09-19 17:30:00	2010-09-19 17:39:59		-999		0.00015	262	0.226	0.046	0.212	0.0984	0.05315	0.1252	0.0481	0.05025	0.0418	0	0	0	0	4.2
261.736	261.743	2010-09-19 17:39:59	2010-09-19 17:50:00		-999		0.00069	250	0.249	0.043	0.236	0.0969	0.0567	0.1293	0.04765	0.04955	0.041	0	0	0	0	5
261.743	261.75	2010-09-19 17:50:00	2010-09-19 18:00:00		-999		0.00195	242	0.273	0.04	0.259	0.0967	0.0616	0.1322	0.04735	0.04855	0.03955	0	0	0	0	5.6
261.75	261.757	2010-09-19 18:00:00	2010-09-19 18:09:59		-999		0.00137	245	0.292	0.04	0.278	0.09885	0.06245	0.13245	0.04875	0.04845	0.03935	0	0	0	0	6
261.757	261.764	2010-09-19 18:09:59	2010-09-19 18:20:00		-999		0.0003	244	0.311	0.038	0.298	0.1034	0.06345	0.1303	0.05165	0.04625	0.03925	0	0	0	0	5.9
261.764	261.771	2010-09-19 18:20:00	2010-09-19 18:29:59		-999		0.00242	242	0.328	0.035	0.316	0.1087	0.0705	0.12905	0.048	0.0408	0.042	0	0	0	0	5.3
261.771	261.778	2010-09-19 18:29:59	2010-09-19 18:40:00		-999		-0.00035	242	0.345	0.033	0.334	0.10725	0.07385	0.12545	0.0475	0.03535	0.0453	0	0	0	0	5.2
261.778	261.785	2010-09-19 18:40:00	2010-09-19 18:49:59		-999		0.00097	251	0.359	0.03	0.349	0.10435	0.07305	0.1157	0.0487	0.03545	0.04835	0	0	0	0	5.2
261.785	261.792	2010-09-19 18:49:59	2010-09-19 19:00:00		-999		0.00192	244	0.375	0.028	0.365	0.0976	0.07365	0.1036	0.04865	0.0353	0.04695	0	0	0	0	5
261.792	261.799	2010-09-19 19:00:00	2010-09-19 19:09:59		-999		0.002	244	0.387	0.027	0.379	0.08735	0.07315	0.0882	0.04705	0.02755	0.04425	0	0	0	0	5.2
261.799	261.806	2010-09-19 19:09:59	2010-09-19 19:20:00		-999		0.0086	269	0.4	0.025	0.393	0.08285	0.0724	0.0773	0.04865	0.02475	0.042	0	0	0	0	4.3
261.806	261.812	2010-09-19 19:20:00	2010-09-19 19:30:00		-999		0.0006	247	0.412	0.024	0.405	0.08225	0.07265	0.07425	0.04935	0.0255	0.04275	0	0	0	0	5.3
261.812	261.819	2010-09-19 19:30:00	2010-09-19 19:39:59		-999		0.00109	248	0.422	0.022	0.416	0.0814	0.0715	0.0651	0.0502	0.0252	0.0439	0	0	0	0	6
261.819	261.826	2010-09-19 19:39:59	2010-09-19 19:50:00		-999		0.0012	250	0.432	0.021	0.427	0.08645	0.0686	0.0571	0.0517	0.026	0.045	0	0	0	0	6
261.826	261.833	2010-09-19 19:50:00	2010-09-19 19:59:59		-999		0.00146	245	0.442	0.018	0.436	0.08995	0.0643	0.05185	0.05395	0.02685	0.0469	0	0	0	0	6.2
261.833	261.84	2010-09-19 19:59:59	2010-09-19 20:10:00		-999		-0.00305	251	0.451	0.017	0.446	0.09225	0.06225	0.0599	0.0545	0.0258	0.0492	0	0	0	0	6.2
261.84	261.847	2010-09-19 20:10:00	2010-09-19 20:19:59		-999		-0.00502	247	0.462	0.016	0.457	0.0916	0.0583	0.0623	0.0538	0.0249	0.05185	0	0	0	0	5.9
261.847	261.854	2010-09-19 20:19:59	2010-09-19 20:30:00		-999		0.0023	251	0.472	0.013	0.468	0.08955	0.04905	0.06725	0.05435	0.0256	0.0543	0	0	0	0	5.9
261.854	261.861	2010-09-19 20:30:00	2010-09-19 20:39:59		-999		5e-05	243	0.481	0.012	0.477	0.0921	0.04385	0.07165	0.053	0.02665	0.054	0	0	0	0	5.7
261.861	261.868	2010-09-19 20:39:59	2010-09-19 20:50:00		-999		0.00053	251	0.488	0.011	0.484	0.0974	0.04075	0.07575	0.0521	0.0271	0.0524	0	0	0	0	6.6
261.868	261.875	2010-09-19 20:50:00	2010-09-19 21:00:00		-999		-0.0066	243	0.493	0.01	0.49	0.1015	0.03815	0.0783	0.0509	0.03015	0.05225	0	0	0	0	6.2
261.875	261.882	2010-09-19 21:00:00	2010-09-19 21:09:59		-999		-0.00704	244	0.496	0.011	0.492	0.1073	0.03945	0.08	0.05225	0.0327	0.05805	0	0	0	0	5.6
261.882	261.889	2010-09-19 21:09:59	2010-09-19 21:20:00		-999		-0.0084	249	0.496	0.01	0.494	0.1086	0.0401	0.08085	0.0544	0.031	0.0614	0	0	0	0	5.1
261.889	261.896	2010-09-19 21:20:00	2010-09-19 21:29:59		-999		0.00158	244	0.495	0.011	0.493	0.1113	0.04575	0.0809	0.05495	0.03115	0.0623	0	0	0	0	5
261.896	261.903	2010-09-19 21:29:59	2010-09-19 21:40:00		-999		-0.00245	247	0.494	0.011	0.491	0.11395	0.0484	0.081	0.0541	0.03155	0.06225	0	0	0	0	4.9
261.903	261.91	2010-09-19 21:40:00	2010-09-19 21:49:59		-999		-0.00217	248	0.492	0.011	0.489	0.11325	0.04615	0.0827	0.0556	0.0309	0.06425	0	0	0	0	5.2
261.91	261.917	2010-09-19 21:49:59	2010-09-19 22:00:00		-999		0.00427	247	0.488	0.013	0.485	0.1155	0.0461	0.0856	0.05645	0.02995	0.06525	0	0	0	0	5.1
261.917	261.924	2010-09-19 22:00:00	2010-09-19 22:09:59		-999		-0.00022	253	0.484	0.016	0.48	0.1153	0.04515	0.0842	0.05625	0.0314	0.06715	0	0	0	0	6.5
261.924	261.931	2010-09-19 22:09:59	2010-09-19 22:20:00		-999		0.00331	251	0.48	0.018	0.474	0.11615	0.04405	0.0866	0.0549	0.03125	0.06595	0	0	0	0	6
261.931	261.938	2010-09-19 22:20:00	2010-09-19 22:30:00		-999		0.00137	250	0.475	0.018	0.468	0.11855	0.04385	0.0944	0.05405	0.03065	0.06385	0	0	0	0	5.8
261.938	261.944	2010-09-19 22:30:00	2010-09-19 22:39:59		-999		0.00896	246	0.474	0.018	0.467	0.12	0.0433	0.09885	0.05505	0.02955	0.0628	0	0	0	0	6.2
261.944	261.951	2010-09-19 22:39:59	2010-09-19 22:50:00		-999		0.006	253	0.474	0.018	0.467	0.12285	0.04225	0.10165	0.05685	0.0289	0.0647	0	0	0	0	5.5
261.951	261.958	2010-09-19 22:50:00	2010-09-19 22:59:59		-999		0	250	0.475	0.019	0.467	0.1232	0.04125	0.103	0.05705	0.02595	0.06475	0	0	0	0	5.3
261.958	261.965	2010-09-19 22:59:59	2010-09-19 23:10:00		-999		0.00505	256	0.478	0.019	0.469	0.1214	0.0394	0.10275	0.0566	0.022	0.0603	0	0	0	0	3.8
261.965	261.972	2010-09-19 23:10:00	2010-09-19 23:19:59		-999		0.00168	249	0.481	0.02	0.472	0.12495	0.04105	0.10375	0.0557	0.0231	0.0569	0	0	0	0	3.2
261.972	261.979	2010-09-19 23:19:59	2010-09-19 23:30:00		-999		0.00148	245	0.484	0.021	0.474	0.12825	0.0398	0.10485	0.05855	0.02565	0.05675	0	0	0	0	2.8
261.979	261.986	2010-09-19 23:30:00	2010-09-19 23:39:59		-999		-0.0022	229	0.49	0.022	0.478	0.1322	0.04005	0.10705	0.0647	0.0285	0.0575	0	0	0	0	2.5
261.986	261.993	2010-09-19 23:39:59	2010-09-19 23:50:00		-999		0.00117	225	0.495	0.023	0.482	0.13965	0.04625	0.1091	0.0666	0.029	0.05935	0	0	0	0	3.3
261.993	262	2010-09-19 23:50:00	2010-09-20		-999		0.00098	244	0.501	0.025	0.487	0.14435	0.05115	0.1092	0.0698	0.02965	0.06295	0	0	0	0	4.7
262	262.007	2010-09-20	2010-09-20 00:09:59		-999		0.00163	243	0.501	0.025	0.49	0.15225	0.05325	0.1142	0.07345	0.02855	0.0654	0	0	0	0	6.6
262.007	262.014	2010-09-20 00:09:59	2010-09-20 00:20:00		-999		-0.0062	249	0.501	0.025	0.493	0.1544	0.0535	0.1155	0.07495	0.0316	0.0708	0	0	0	0	6.2
262.014	262.021	2010-09-20 00:20:00	2010-09-20 00:29:59		-999		-0.00383	246	0.5	0.026	0.493	0.15715	0.0546	0.11295	0.0781	0.0323	0.0764	0	0	0	0	5.9
262.021	262.028	2010-09-20 00:29:59	2010-09-20 00:40:00		-999		0.00774	245	0.501	0.027	0.493	0.16205	0.0569	0.11245	0.081	0.03235	0.0784	0	0	0	0	5.6
262.028	262.035	2010-09-20 00:40:00	2010-09-20 00:49:59		-999		0.0012	248	0.504	0.028	0.494	0.1642	0.05755	0.11385	0.08255	0.03255	0.0801	0	0	0	0	4.9
262.035	262.042	2010-09-20 00:49:59	2010-09-20 01:00:00		-999		0.00115	245	0.507	0.029	0.495	0.1666	0.0587	0.11495	0.08515	0.03315	0.08205	0	0	0	0	5
262.042	262.049	2010-09-20 01:00:00	2010-09-20 01:09:59		-999		0.00225	246	0.509	0.031	0.496	0.1713	0.06065	0.1177	0.0853	0.033	0.08275	0	0	0	0	5.9
262.049	262.056	2010-09-20 01:09:59	2010-09-20 01:20:00		-999		0.00607	241	0.511	0.031	0.497	0.1713	0.06055	0.1185	0.0868	0.03235	0.08555	0	0	0	0	6.1
262.056	262.062	2010-09-20 01:20:00	2010-09-20 01:30:00		-999		0.0008	241	0.513	0.032	0.499	0.1693	0.05815	0.1191	0.0838	0.03075	0.08575	0	0	0	0	5.9
262.062	262.069	2010-09-20 01:30:00	2010-09-20 01:39:59		-999		-0.00384	245	0.516	0.033	0.5	0.1654	0.05625	0.1174	0.08015	0.02945	0.08515	0	0	0	0	6
262.069	262.076	2010-09-20 01:39:59	2010-09-20 01:50:00		-999		-0.0032	235	0.516	0.035	0.499	0.15875	0.05135	0.11535	0.0784	0.0303	0.0826	0	0	0	0	6.1
262.076	262.083	2010-09-20 01:50:00	2010-09-20 01:59:59		-999		0.00191	247	0.514	0.035	0.497	0.1513	0.046	0.11265	0.07455	0.03035	0.07925	0	0	0	0	6.8
262.083	262.09	2010-09-20 01:59:59	2010-09-20 02:10:00		-999		-0.00507	247	0.514	0.034	0.497	0.14115	0.0437	0.10515	0.07175	0.03075	0.07575	0	0	0	0	6.9
262.09	262.097	2010-09-20 02:10:00	2010-09-20 02:19:59		-999		-0.00025	246	0.514	0.034	0.498	0.13605	0.0424	0.1014	0.07305	0.0288	0.07105	0	0	0	0	7.2
262.097	262.104	2010-09-20 02:19:59	2010-09-20 02:30:00		-999		-0.00656	245	0.515	0.036	0.497	0.13025	0.0408	0.0978	0.07055	0.02815	0.06555	0	0	0	0	7.2
262.104	262.111	2010-09-20 02:30:00	2010-09-20 02:39:59		-999		0.0088	251	0.51	0.038	0.491	0.1206	0.0376	0.0925	0.06725	0.03125	0.063	0	0	0	0	7.4
262.111	262.118	2010-09-20 02:39:59	2010-09-20 02:50:00		-999		-0.00588	249	0.506	0.039	0.486	0.1123	0.03555	0.08635	0.0645	0.0317	0.05925	0	0	0	0	7.4
262.118	262.125	2010-09-20 02:50:00	2010-09-20 03:00:00		-999		-0.00558	249	0.503	0.04	0.483	0.10765	0.03695	0.08195	0.06135	0.03155	0.05625	0	0	0	0	7.7
262.125	262.132	2010-09-20 03:00:00	2010-09-20 03:09:59		-999		-0.00079	247	0.498	0.04	0.479	0.10165	0.0406	0.07505	0.0624	0.03215	0.05485	0	0	0	0	7.3
262.132	262.139	2010-09-20 03:09:59	2010-09-20 03:20:00		-999		0.0016	240	0.494	0.04	0.475	0.1046	0.0437	0.07385	0.05905	0.03165	0.05025	0	0	0	0	6.2
262.139	262.146	2010-09-20 03:20:00	2010-09-20 03:29:59		-999		0.00446	235	0.492	0.04	0.473	0.10275	0.0463	0.07035	0.05885	0.03075	0.0496	0	0	0	0	6.5
262.146	262.153	2010-09-20 03:29:59	2010-09-20 03:40:00		-999		0.00015	242	0.486	0.04	0.468	0.1011	0.04845	0.0676	0.0585	0.0292	0.0499	0	0	0	0	6.6
262.153	262.16	2010-09-20 03:40:00	2010-09-20 03:49:59		-999		5e-05	242	0.481	0.039	0.464	0.0999	0.05045	0.06385	0.057	0.02815	0.0492	0	0	0	0	7.1
262.16	262.167	2010-09-20 03:49:59	2010-09-20 04:00:00		-999		-0.0017	245	0.475	0.039	0.459	0.1004	0.0521	0.06225	0.0579	0.02795	0.04995	0	0	0	0	6.7
262.167	262.174	2010-09-20 04:00:00	2010-09-20 04:09:59		-999		0.0137	240	0.477	0.039	0.456	0.1011	0.0529	0.0611	0.05715	0.0274	0.05015	0	0	0	0	7.1
262.174	262.181	2010-09-20 04:09:59	2010-09-20 04:20:00		-999		0.0077	232	0.478	0.038	0.453	0.10215	0.0555	0.05905	0.05445	0.0261	0.04995	0	0	0	0	6.7
262.181	262.188	2010-09-20 04:20:00	2010-09-20 04:30:00		-999		0.0049	250	0.479	0.037	0.452	0.09995	0.0597	0.05165	0.05715	0.0296	0.0489	0	0	0	0	7.1
262.188	262.194	2010-09-20 04:30:00	2010-09-20 04:39:59		-999		-0.00525	248	0.477	0.036	0.452	0.1	0.0629	0.0471	0.05845	0.02615	0.0513	0	0	0	0	7.5
262.194	262.201	2010-09-20 04:39:59	2010-09-20 04:50:00		-999		-0.0003	237	0.479	0.036	0.456	0.09835	0.06485	0.0426	0.0597	0.02505	0.0533	0	0	0	0	7.3
262.201	262.208	2010-09-20 04:50:00	2010-09-20 04:59:59		-999		0.00616	252	0.481	0.035	0.46	0.0955	0.06425	0.0465	0.06345	0.0268	0.0546	0	0	0	0	7.9
262.208	262.215	2010-09-20 04:59:59	2010-09-20 05:10:00		-999		-0.00149	246	0.482	0.034	0.463	0.08935	0.0607	0.04435	0.0623	0.0259	0.0556	0	0	0	0	8.4
262.215	262.222	2010-09-20 05:10:00	2010-09-20 05:19:59		-999		-0.0006	249	0.488	0.033	0.47	0.0769	0.0585	0.03775	0.0634	0.02605	0.05645	0	0	0	0	7.8
262.222	262.229	2010-09-20 05:19:59	2010-09-20 05:30:00		-999		0.00106	244	0.496	0.033	0.479	0.0725	0.0574	0.0375	0.0632	0.0251	0.05495	0	0	0	0	8
262.229	262.236	2010-09-20 05:30:00	2010-09-20 05:39:59		-999		0.00353	249	0.503	0.031	0.489	0.0701	0.0561	0.0388	0.06305	0.0248	0.05495	0	0	0	0	8
262.236	262.243	2010-09-20 05:39:59	2010-09-20 05:50:00		-999		0.00035	251	0.51	0.03	0.497	0.07005	0.062	0.0402	0.0647	0.0245	0.05755	0	0	0	0	7.8
262.243	262.25	2010-09-20 05:50:00	2010-09-20 06:00:00		-999		0.0003	241	0.52	0.029	0.509	0.0703	0.0704	0.0432	0.06425	0.0242	0.0575	0	0	0	0	8.4
262.25	262.257	2010-09-20 06:00:00	2010-09-20 06:09:59		-999		0.00037	242	0.533	0.029	0.524	0.0671	0.07725	0.0507	0.064	0.02425	0.0572	0	0	0	0	8.3
262.257	262.264	2010-09-20 06:09:59	2010-09-20 06:20:00		-999		0.001	248	0.541	0.029	0.535	0.06645	0.0773	0.0572	0.0629	0.02395	0.0562	0	0	0	0	8.7
262.264	262.271	2010-09-20 06:20:00	2010-09-20 06:29:59		-999		0.00062	243	0.549	0.027	0.544	0.07165	0.0753	0.0748	0.05845	0.0206	0.05535	0	0	0	0	7.9
262.271	262.278	2010-09-20 06:29:59	2010-09-20 06:40:00		-999		0.00068	247	0.555	0.024	0.552	0.07115	0.0748	0.08495	0.05545	0.0207	0.05185	0	0	0	0	7
262.278	262.285	2010-09-20 06:40:00	2010-09-20 06:49:59		-999		0.00102	252	0.56	0.023	0.559	0.0973	0.0809	0.12935	0.0523	0.02085	0.04825	0	0	0	0	7.3
262.285	262.292	2010-09-20 06:49:59	2010-09-20 07:00:00		-999		-0.00052	248	0.56	0.024	0.562	0.09895	0.0859	0.13915	0.05	0.01865	0.04705	0	0	0	0	7.3
262.292	262.299	2010-09-20 07:00:00	2010-09-20 07:09:59		-999		0.001	249	0.559	0.024	0.562	0.099	0.09075	0.1476	0.0497	0.0179	0.0459	0	0	0	0	6.5
262.299	262.306	2010-09-20 07:09:59	2010-09-20 07:20:00		-999		0.00525	248	0.555	0.023	0.558	0.099	0.09095	0.1495	0.0512	0.01835	0.04655	0	0	0	0	6.7
262.306	262.312	2010-09-20 07:20:00	2010-09-20 07:30:00		-999		0.0045	246	0.55	0.021	0.555	0.09805	0.0902	0.1494	0.0521	0.01855	0.0474	0	0	0	0	7.6
262.312	262.319	2010-09-20 07:30:00	2010-09-20 07:39:59		-999		-0.00113	248	0.544	0.021	0.55	0.09735	0.09055	0.1493	0.0502	0.01875	0.0463	0	0	0	0	8.3
262.319	262.326	2010-09-20 07:39:59	2010-09-20 07:50:00		-999		0.0034	243	0.537	0.021	0.544	0.09495	0.0853	0.14925	0.049	0.0233	0.04295	0	0	0	0	8.3
262.326	262.333	2010-09-20 07:50:00	2010-09-20 07:59:59		-999		0.01158	248	0.53	0.02	0.538	0.09225	0.0776	0.1482	0.04705	0.0242	0.0404	0	0	0	0	7.9
262.333	262.34	2010-09-20 07:59:59	2010-09-20 08:10:00		-999		0.001	251	0.522	0.019	0.531	0.0921	0.06995	0.1456	0.0446	0.02515	0.0377	0	0	0	0	8.2
262.34	262.347	2010-09-20 08:10:00	2010-09-20 08:19:59		-999		-0.00042	247	0.515	0.019	0.524	0.08915	0.0683	0.14325	0.04345	0.0263	0.03805	0	0	0	0	8.5
262.347	262.354	2010-09-20 08:19:59	2010-09-20 08:30:00		-999		-5e-05	244	0.508	0.019	0.518	0.08205	0.0683	0.13575	0.04455	0.03095	0.03775	0	0	0	0	8
262.354	262.361	2010-09-20 08:30:00	2010-09-20 08:39:59		-999		-0.00028	241	0.505	0.019	0.513	0.07885	0.06905	0.13175	0.0442	0.0319	0.03825	0	0	0	0	8.5
262.361	262.368	2010-09-20 08:39:59	2010-09-20 08:50:00		-999		0.00194	250	0.494	0.02	0.502	0.03845	0.06235	0.0916	0.04615	0.0328	0.03805	0	0	0	0	8.5
262.368	262.375	2010-09-20 08:50:00	2010-09-20 09:00:00		-999		0.00187	248	0.482	0.02	0.49	0.0344	0.05755	0.0811	0.04245	0.0331	0.0385	0	0	0	0	8
262.375	262.382	2010-09-20 09:00:00	2010-09-20 09:09:59		-999		0.00109	247	0.47	0.02	0.477	0.02905	0.05725	0.06975	0.04075	0.1518	0.1581	0	0	0	0	7.6
262.382	262.389	2010-09-20 09:09:59	2010-09-20 09:20:00		-999		-0.0013	244	0.453	0.021	0.461	0.02825	0.06005	0.0692	0.0365	0.1517	0.15785	0	0	0	0	7.7
262.389	262.396	2010-09-20 09:20:00	2010-09-20 09:29:59		-999		-0.00296	245	0.432	0.021	0.44	0.03205	0.0607	0.07435	0.03695	0.1518	0.15855	0	0	0	0	8
262.396	262.403	2010-09-20 09:29:59	2010-09-20 09:40:00		-999		-0.00702	244	0.409	0.021	0.418	0.0396	0.0598	0.08095	0.037	0.15215	0.1584	0	0	0	0	7.1
262.403	262.41	2010-09-20 09:40:00	2010-09-20 09:49:59		-999		0.0076	244	0.39	0.021	0.398	0.0397	0.06025	0.082	0.0355	0.1517	0.15825	0	0	0	0	5.9
262.41	262.417	2010-09-20 09:49:59	2010-09-20 10:00:00		-999		-0.00129	256	0.368	0.02	0.376	0.0405	0.06245	0.0849	0.03565	0.15155	0.15825	0	0	0	0	5.5
262.417	262.424	2010-09-20 10:00:00	2010-09-20 10:09:59		-999		0.0026	245	0.339	0.02	0.346	0.0404	0.0637	0.0867	0.03615	0.1514	0.15825	0	0	0	0	5.4
262.424	262.431	2010-09-20 10:09:59	2010-09-20 10:20:00		-999		0.00455	232	0.314	0.023	0.319	0.04085	0.06965	0.09325	0.03685	0.15125	0.15805	0	0	0	0	5.9
262.431	262.438	2010-09-20 10:20:00	2010-09-20 10:30:00		-999		0.00222	242	0.289	0.024	0.294	0.04075	0.08305	0.1058	0.03465	0.15035	0.15785	0	0	0	0	5.6
262.438	262.444	2010-09-20 10:30:00	2010-09-20 10:39:59		-999		0.00129	236	0.268	0.025	0.271	0.04025	0.08655	0.10645	0.0362	0.1505	0.15765	0	0	0	0	5.5
262.444	262.451	2010-09-20 10:39:59	2010-09-20 10:50:00		-999		-0.0004	230	0.244	0.025	0.246	0.0403	0.0866	0.10575	0.03325	0.15025	0.15755	0	0	0	0	6.3
262.451	262.458	2010-09-20 10:50:00	2010-09-20 10:59:59		-999		0.00508	238	0.222	0.026	0.221	0.03525	0.08765	0.10195	0.03315	0.1503	0.15705	0	0	0	0	6.6
262.458	262.465	2010-09-20 10:59:59	2010-09-20 11:10:00		-999		-0.00091	239	0.202	0.027	0.199	0.03495	0.08535	0.10085	0.03185	0.0252	0.0321	0	0	0	0	6.8
262.465	262.472	2010-09-20 11:10:00	2010-09-20 11:19:59				-0.00302	246	0.189	0.028	0.186	0.0352	0.08235	0.09825	0.03075	0.0257	0.03025	0	0	0	0	8.3
262.472	262.479	2010-09-20 11:19:59	2010-09-20 11:30:00				-6e-05	259	0.172	0.028	0.167	0.0328	0.0813	0.0946	0.02665	0.0254	0.02305	0	0	0	0	8
262.479	262.486	2010-09-20 11:30:00	2010-09-20 11:39:59				0.00038	246	0.163	0.029	0.157	0.02385	0.08145	0.0898	0.02525	0.0231	0.02135	0	0	0	0	7.3
262.486	262.493	2010-09-20 11:39:59	2010-09-20 11:50:00				0.002	238	0.157	0.03	0.149	0.0233	0.08485	0.09065	0.0242	0.0246	0.02175	0	0	0	0	7.9
262.493	262.5	2010-09-20 11:50:00	2010-09-20 12:00:00	NCE0.4		Tracer Exp. 1	0.00167	237	0.149	0.031	0.139	0.02555	0.08615	0.0895	0.02415	0.02855	0.0229	0	0	0	0	7.4
262.5	262.507	2010-09-20 12:00:00	2010-09-20 12:09:59	NCE0.4		Tracer Exp. 1	0.00675	244	0.14	0.032	0.13	0.0301	0.08615	0.08785	0.02485	0.03035	0.02205	0	0	0	0	6.9
262.507	262.514	2010-09-20 12:09:59	2010-09-20 12:20:00	NCE0.4		Tracer Exp. 1	0.001	245	0.129	0.033	0.119	0.02945	0.08175	0.08075	0.0244	0.03065	0.02025	0	0	0	0	7.9
262.514	262.521	2010-09-20 12:20:00	2010-09-20 12:29:59	NCE0.4		Tracer Exp. 1	0.002	237	0.114	0.034	0.102	0.0292	0.0669	0.0622	0.02565	0.0316	0.02015	0	0	0	0	7.9
262.521	262.528	2010-09-20 12:29:59	2010-09-20 12:40:00	NCE0.4		Tracer Exp. 1	0.0093	236	0.082	0.036	0.07	0.029	0.0607	0.0568	0.02445	0.0317	0.0205	0	0	0	0	8.4
262.528	262.535	2010-09-20 12:40:00	2010-09-20 12:49:59	NCE0.4		Tracer Exp. 1	7e-05	247	0.069	0.037	0.057	0.02885	0.05805	0.05325	0.02445	0.03215	0.02125	0	0	0	0	8.2
262.535	262.542	2010-09-20 12:49:59	2010-09-20 13:00:00	NCE0.4			0.0028	231	0.064	0.039	0.051	0.02885	0.05335	0.0473	0.0239	0.0309	0.02155	0	0	0	0	9
262.542	262.549	2010-09-20 13:00:00	2010-09-20 13:09:59	NCE0.4			-0.00782	241	0.059	0.041	0.044	0.0297	0.04885	0.0419	0.02365	0.03135	0.0219	0	0	0	0	8
262.549	262.556	2010-09-20 13:09:59	2010-09-20 13:20:00	NCE0.4			0.00075	244	0.057	0.043	0.036	0.0294	0.04935	0.04195	0.0239	0.0312	0.02235	0	0	0	0	8.9
262.556	262.562	2010-09-20 13:20:00	2010-09-20 13:30:00	NCE0.4			0.00093	233	0.055	0.044	0.03	0.0297	0.04935	0.04035	0.02415	0.0319	0.0231	0	0	0	0	8.4
262.562	262.569	2010-09-20 13:30:00	2010-09-20 13:39:59	NCE0.4			0.00229	235	0.054	0.045	0.026	0.0297	0.04865	0.0372	0.03105	0.03595	0.02325	0	0	0	0	7.4
262.569	262.576	2010-09-20 13:39:59	2010-09-20 13:50:00	NCE0.4			0.0067	238	0.052	0.046	0.02	0.03015	0.04145	0.03065	0.0331	0.0349	0.0273	0	0	0	0	8.4
262.576	262.583	2010-09-20 13:50:00	2010-09-20 13:59:59	NCE0.4			-0.00104	218	0.052	0.047	0.014	0.0276	0.0353	0.02555	0.03325	0.0316	0.02825	0	0	0	0	8.1
262.583	262.59	2010-09-20 13:59:59	2010-09-20 14:10:00	NCE0.4			-0.00195	226	0.052	0.048	0.014	0.0245	0.0359	0.02455	0.03625	0.0306	0.03205	0	0	0	0	8.4
262.59	262.597	2010-09-20 14:10:00	2010-09-20 14:19:59	NCE0.4			0.00128	240	0.05	0.047	0.012	0.0254	0.0355	0.0264	0.0398	0.0333	0.03575	0	0	0	0	8.4
262.597	262.604	2010-09-20 14:19:59	2010-09-20 14:30:00	NCE0.4			-5e-05	235	0.051	0.047	0.012	0.02625	0.0363	0.03105	0.0409	0.0382	0.04405	0	0	0	0	8.2
262.604	262.611	2010-09-20 14:30:00	2010-09-20 14:39:59	NCE0.4			-0.00623	237	0.051	0.048	0.013	0.02645	0.0376	0.0348	0.04265	0.1553	0.1525	0	0	0	0	6.9
262.611	262.618	2010-09-20 14:39:59	2010-09-20 14:50:00	NCE0.4			0.00421	235	0.054	0.048	0.015	0.02805	0.03715	0.03525	0.04335	0.1553	0.1524	0	0	0	0	8.1
262.618	262.625	2010-09-20 14:50:00	2010-09-20 15:00:00	NCE0.4			0.0009	235	0.055	0.048	0.015	0.02975	0.03565	0.03785	0.0442	0.15555	0.15295	0	0	0	0	8.6
262.625	262.632	2010-09-20 15:00:00	2010-09-20 15:09:59	NCE0.4			-0.00038	227	0.055	0.048	0.015	0.0805	0.0351	0.08655	0.0467	0.1558	0.1535	0	0	0	0	8.4
262.632	262.639	2010-09-20 15:09:59	2010-09-20 15:20:00	NCE0.4			-0.0007	225	0.059	0.048	0.02	0.13165	0.03535	0.137	0.04745	0.15575	0.15395	0	0	0	0	8.5
262.639	262.646	2010-09-20 15:20:00	2010-09-20 15:29:59	NCE0.4			0.00316	225	0.064	0.048	0.029	0.1316	0.0359	0.13775	0.0517	0.15585	0.1556	0	0	0	0	8.3
262.646	262.653	2010-09-20 15:29:59	2010-09-20 15:40:00	NCE0.4			0.00321	228	0.069	0.048	0.035	0.132	0.0362	0.13925	0.0506	0.15495	0.1559	0	0	0	0	6.5
262.653	262.66	2010-09-20 15:40:00	2010-09-20 15:49:59	NCE0.4			5e-05	227	0.072	0.049	0.037	0.1333	0.0372	0.14245	0.04905	0.15515	0.1553	0	0	0	0	7.7
262.66	262.667	2010-09-20 15:49:59	2010-09-20 16:00:00	NCE0.4			-0.00351	234	0.075	0.049	0.039	0.1344	0.0372	0.14425	0.0507	0.1555	0.1555	0	0	0	0	7.9
262.667	262.674	2010-09-20 16:00:00	2010-09-20 16:09:59	NCE0.4			0.00197	232	0.083	0.05	0.047	0.13405	0.0355	0.1449	0.04815	0.1554	0.15505	0	0	0	0	6.8
262.674	262.681	2010-09-20 16:09:59	2010-09-20 16:20:00	NCE0.4			0.00221	230	0.09	0.05	0.052	0.1827	0.0366	0.19525	0.0454	0.15485	0.15435	0	0	0	0	8.2
262.681	262.688	2010-09-20 16:20:00	2010-09-20 16:30:00				0.0014	231	0.102	0.05	0.065	0.19165	0.03855	0.20515	0.0443	0.1535	0.1529	0	0	0	0	7.8
262.688	262.694	2010-09-20 16:30:00	2010-09-20 16:39:59				0.00209	224	0.112	0.05	0.075	0.192	0.03915	0.2065	0.0428	0.0297	0.048	0	0	0	0	8
262.694	262.701	2010-09-20 16:39:59	2010-09-20 16:50:00				-0.0003	221	0.122	0.049	0.087	0.19175	0.0412	0.20665	0.0419	0.0291	0.0474	0	0	0	0	8
262.701	262.708	2010-09-20 16:50:00	2010-09-20 16:59:59				0.00163	231	0.136	0.048	0.103	0.1915	0.04425	0.2065	0.0414	0.028	0.04575	0	0	0	0	7.6
262.708	262.715	2010-09-20 16:59:59	2010-09-20 17:10:00				-0.0021	224	0.157	0.047	0.126	0.1673	0.0471	0.18535	0.04065	0.02585	0.0451	0	0	0	0	8
262.715	262.722	2010-09-20 17:10:00	2010-09-20 17:19:59				0.0039	224	0.178	0.046	0.149	0.14245	0.04735	0.1623	0.03955	0.02565	0.04315	0	0	0	0	7.5
262.722	262.729	2010-09-20 17:19:59	2010-09-20 17:30:00		-999		0.00119	231	0.202	0.046	0.173	0.14265	0.0464	0.16225	0.0344	0.0245	0.0379	0	0	0	0	7.9
262.729	262.736	2010-09-20 17:30:00	2010-09-20 17:39:59		-999		0.00702	231	0.224	0.045	0.197	0.1423	0.0468	0.1616	0.0309	0.0246	0.03665	0	0	0	0	7.6
262.736	262.743	2010-09-20 17:39:59	2010-09-20 17:50:00		-999		0.01428	232	0.245	0.044	0.219	0.14075	0.04755	0.1593	0.03425	0.0237	0.0366	0	0	0	0	8.1
262.743	262.75	2010-09-20 17:50:00	2010-09-20 18:00:00		-999		-0.00332	221	0.27	0.043	0.244	0.1406	0.04925	0.1579	0.03255	0.0209	0.03565	0	0	0	0	7.7
262.75	262.757	2010-09-20 18:00:00	2010-09-20 18:09:59		-999		0.00696	223	0.292	0.043	0.266	0.14185	0.05035	0.1574	0.036	0.021	0.03615	0	0	0	0	7.7
262.757	262.764	2010-09-20 18:09:59	2010-09-20 18:20:00		-999		-0.0007	235	0.312	0.042	0.286	0.06495	0.05485	0.08435	0.03765	0.02175	0.03625	0	0	0	0	6.9
262.764	262.771	2010-09-20 18:20:00	2010-09-20 18:29:59		-999		0.00113	234	0.33	0.042	0.305	0.04005	0.0569	0.05835	0.0372	0.0216	0.0343	0	0	0	0	6
262.771	262.778	2010-09-20 18:29:59	2010-09-20 18:40:00		-999		0.00078	235	0.348	0.041	0.324	0.03965	0.05595	0.05015	0.03795	0.0217	0.03355	0	0	0	0	5.7
262.778	262.785	2010-09-20 18:40:00	2010-09-20 18:49:59		-999		0.00443	227	0.366	0.04	0.342	0.04305	0.05635	0.0484	0.03945	0.023	0.036	0	0	0	0	5.9
262.785	262.792	2010-09-20 18:49:59	2010-09-20 19:00:00		-999		0.04731	240	0.384	0.04	0.359	0.04425	0.05625	0.04755	0.03975	0.02345	0.03615	0	0	0	0	5.1
262.792	262.799	2010-09-20 19:00:00	2010-09-20 19:09:59		-999		0.00015	239	0.4	0.04	0.374	0.0458	0.0544	0.0435	0.03825	0.024	0.03515	0	0	0	0	5.7
262.799	262.806	2010-09-20 19:09:59	2010-09-20 19:20:00		-999		0.00173	245	0.413	0.04	0.387	0.04725	0.05695	0.03785	0.0395	0.02425	0.03665	0	0	0	0	6
262.806	262.812	2010-09-20 19:20:00	2010-09-20 19:30:00		-999		0.00193	243	0.425	0.04	0.4	0.0495	0.0615	0.03645	0.0401	0.0264	0.0363	0	0	0	0	6.3
262.812	262.819	2010-09-20 19:30:00	2010-09-20 19:39:59		-999		0.00309	242	0.438	0.04	0.412	0.05035	0.0615	0.0344	0.04135	0.0275	0.03685	0	0	0	0	5.8
262.819	262.826	2010-09-20 19:39:59	2010-09-20 19:50:00		-999		0.0014	247	0.451	0.039	0.425	0.0517	0.0602	0.0322	0.03895	0.0279	0.0375	0	0	0	0	5.8
262.826	262.833	2010-09-20 19:50:00	2010-09-20 19:59:59		-999		0.00379	252	0.462	0.038	0.436	0.05495	0.05985	0.0339	0.0383	0.02915	0.03875	0	0	0	0	6.3
262.833	262.84	2010-09-20 19:59:59	2010-09-20 20:10:00		-999		-0.00016	254	0.472	0.037	0.447	0.0595	0.0592	0.04005	0.03635	0.02865	0.03745	0	0	0	0	6.4
262.84	262.847	2010-09-20 20:10:00	2010-09-20 20:19:59		-999		-0.00573	256	0.48	0.035	0.455	0.0636	0.05455	0.04255	0.0359	0.0289	0.0392	0	0	0	0	6.2
262.847	262.854	2010-09-20 20:19:59	2010-09-20 20:30:00		-999		0.00019	251	0.486	0.034	0.461	0.06735	0.05145	0.04405	0.04075	0.0283	0.0453	0	0	0	0	6.6
262.854	262.861	2010-09-20 20:30:00	2010-09-20 20:39:59		-999		0.0023	248	0.492	0.034	0.467	0.07225	0.0504	0.04725	0.04175	0.02835	0.04885	0	0	0	0	6.2
262.861	262.868	2010-09-20 20:39:59	2010-09-20 20:50:00		-999		0.00203	251	0.497	0.035	0.472	0.0762	0.0496	0.0511	0.04305	0.02815	0.05165	0	0	0	0	6.3
262.868	262.875	2010-09-20 20:50:00	2010-09-20 21:00:00		-999		0.00247	243	0.501	0.035	0.476	0.082	0.04995	0.05325	0.0506	0.02795	0.0575	0	0	0	0	6.6
262.875	262.882	2010-09-20 21:00:00	2010-09-20 21:09:59		-999		-0.00067	246	0.503	0.035	0.477	0.08975	0.0489	0.06125	0.05715	0.0297	0.0625	0	0	0	0	6.5
262.882	262.889	2010-09-20 21:09:59	2010-09-20 21:20:00		-999		0.0038	248	0.503	0.035	0.477	0.10045	0.0448	0.0738	0.05975	0.0304	0.0654	0	0	0	0	6.4
262.889	262.896	2010-09-20 21:20:00	2010-09-20 21:29:59		-999		-0.00013	242	0.501	0.035	0.476	0.10965	0.0384	0.0859	0.0623	0.03095	0.06635	0	0	0	0	6
262.896	262.903	2010-09-20 21:29:59	2010-09-20 21:40:00		-999		0.00155	250	0.499	0.035	0.474	0.1185	0.03755	0.09385	0.0624	0.0327	0.0659	0	0	0	0	6.5
262.903	262.91	2010-09-20 21:40:00	2010-09-20 21:49:59		-999		0.00233	254	0.497	0.035	0.471	0.1298	0.0405	0.10145	0.06305	0.0331	0.0652	0	0	0	0	6
262.91	262.917	2010-09-20 21:49:59	2010-09-20 22:00:00		-999		-0.00067	254	0.493	0.034	0.467	0.1386	0.0402	0.1121	0.0638	0.0328	0.0641	0	0	0	0	5.9
262.917	262.924	2010-09-20 22:00:00	2010-09-20 22:09:59		-999		0.00473	257	0.488	0.034	0.463	0.1462	0.03905	0.1211	0.06485	0.03295	0.06655	0	0	0	0	5.2
262.924	262.931	2010-09-20 22:09:59	2010-09-20 22:20:00		-999		0.00566	267	0.483	0.034	0.458	0.1545	0.0382	0.1313	0.0657	0.03295	0.06645	0	0	0	0	5.5
262.931	262.938	2010-09-20 22:20:00	2010-09-20 22:30:00		-999		-2e-05	264	0.478	0.035	0.452	0.1627	0.0374	0.13965	0.0665	0.03265	0.06515	0	0	0	0	5.2
262.938	262.944	2010-09-20 22:30:00	2010-09-20 22:39:59		-999		0.00879	264	0.472	0.037	0.444	0.1689	0.03565	0.14725	0.0705	0.0358	0.06595	0	0	0	0	5.1
262.944	262.951	2010-09-20 22:39:59	2010-09-20 22:50:00		-999		-0.0037	264	0.465	0.039	0.436	0.17395	0.0343	0.15295	0.07485	0.0367	0.071	0	0	0	0	5
262.951	262.958	2010-09-20 22:50:00	2010-09-20 22:59:59		-999		0.00142	258	0.459	0.04	0.429	0.17775	0.0302	0.1589	0.07465	0.0362	0.07205	0	0	0	0	4.6
262.958	262.965	2010-09-20 22:59:59	2010-09-20 23:10:00		-999		0.00281	258	0.453	0.04	0.422	0.17925	0.0296	0.16085	0.0752	0.03415	0.0734	0	0	0	0	4.6
262.965	262.972	2010-09-20 23:10:00	2010-09-20 23:19:59		-999		-0.00225	258	0.447	0.04	0.417	0.17825	0.02935	0.16035	0.0778	0.0338	0.07635	0	0	0	0	5.1
262.972	262.979	2010-09-20 23:19:59	2010-09-20 23:30:00		-999		0.00707	262	0.442	0.042	0.41	0.17685	0.0297	0.15865	0.07955	0.0324	0.0791	0	0	0	0	5.3
262.979	262.986	2010-09-20 23:30:00	2010-09-20 23:39:59		-999		0.00272	265	0.436	0.042	0.403	0.17515	0.02965	0.15725	0.0812	0.03095	0.0807	0	0	0	0	5
262.986	262.993	2010-09-20 23:39:59	2010-09-20 23:50:00		-999		-0.00396	260	0.43	0.042	0.397	0.1719	0.0283	0.15535	0.08465	0.03075	0.08355	0	0	0	0	5.3
262.993	263	2010-09-20 23:50:00	2010-09-21		-999		-0.00295	256	0.426	0.043	0.391	0.16915	0.0298	0.15075	0.0873	0.03185	0.08865	0	0	0	0	5.5
263	263.007	2010-09-21	2010-09-21 00:09:59		-999		0.00367	259	0.422	0.044	0.386	0.1657	0.0309	0.1465	0.0917	0.03245	0.091	0	0	0	0	5.6
263.007	263.014	2010-09-21 00:09:59	2010-09-21 00:20:00		-999		0.0053	263	0.42	0.044	0.384	0.1623	0.03045	0.14495	0.09515	0.0318	0.09535	0	0	0	0	5.7
263.014	263.021	2010-09-21 00:20:00	2010-09-21 00:29:59		-999		-0.00617	260	0.419	0.045	0.383	0.1592	0.02965	0.1426	0.1001	0.0337	0.09655	0	0	0	0	5.8
263.021	263.028	2010-09-21 00:29:59	2010-09-21 00:40:00		-999		0.00902	261	0.42	0.046	0.382	0.15895	0.0295	0.14225	0.1043	0.0306	0.1018	0	0	0	0	5.4
263.028	263.035	2010-09-21 00:40:00	2010-09-21 00:49:59		-999		0.00553	260	0.42	0.048	0.382	0.1563	0.0288	0.1408	0.10715	0.03245	0.1072	0	0	0	0	5
263.035	263.042	2010-09-21 00:49:59	2010-09-21 01:00:00		-999		0.00249	261	0.42	0.049	0.38	0.1545	0.0287	0.13815	0.1117	0.03305	0.1126	0	0	0	0	5.2
263.042	263.049	2010-09-21 01:00:00	2010-09-21 01:09:59		-999		0.0017	263	0.419	0.049	0.38	0.152	0.0298	0.1345	0.11875	0.0336	0.1184	0	0	0	0	4.9
263.049	263.056	2010-09-21 01:09:59	2010-09-21 01:20:00		-999		-0.00135	266	0.419	0.05	0.381	0.14905	0.0333	0.1296	0.1238	0.03355	0.121	0	0	0	0	5.1
263.056	263.062	2010-09-21 01:20:00	2010-09-21 01:30:00		-999		0.0027	267	0.419	0.05	0.383	0.1476	0.0353	0.1263	0.1276	0.0353	0.12475	0	0	0	0	4.8
263.062	263.069	2010-09-21 01:30:00	2010-09-21 01:39:59		-999		0.00441	267	0.422	0.052	0.384	0.14675	0.0372	0.1242	0.1336	0.03795	0.127	0	0	0	0	4.7
263.069	263.076	2010-09-21 01:39:59	2010-09-21 01:50:00		-999		-0.0027	263	0.425	0.055	0.385	0.14365	0.04035	0.12135	0.13745	0.0386	0.12865	0	0	0	0	4.6
263.076	263.083	2010-09-21 01:50:00	2010-09-21 01:59:59		-999		-0.00554	263	0.429	0.057	0.387	0.13955	0.0399	0.1182	0.14165	0.0451	0.1264	0	0	0	0	4.6
263.083	263.09	2010-09-21 01:59:59	2010-09-21 02:10:00		-999		0.0033	262	0.433	0.06	0.388	0.13525	0.04355	0.1128	0.1433	0.0461	0.12655	0	0	0	0	4.4
263.09	263.097	2010-09-21 02:10:00	2010-09-21 02:19:59		-999		0.01495	259	0.438	0.062	0.391	0.1294	0.04785	0.1014	0.1457	0.0469	0.1267	0	0	0	0	4.3
263.097	263.104	2010-09-21 02:19:59	2010-09-21 02:30:00		-999		0.00032	260	0.444	0.064	0.395	0.1212	0.0519	0.0921	0.1486	0.04655	0.13035	0	0	0	0	4.6
263.104	263.111	2010-09-21 02:30:00	2010-09-21 02:39:59		-999		0.00598	258	0.451	0.064	0.401	0.10945	0.0528	0.07825	0.15115	0.051	0.12835	0	0	0	0	4.5
263.111	263.118	2010-09-21 02:39:59	2010-09-21 02:50:00		-999		0.0018	258	0.458	0.067	0.406	0.10105	0.05465	0.06755	0.15475	0.05355	0.12265	0	0	0	0	4.3
263.118	263.125	2010-09-21 02:50:00	2010-09-21 03:00:00		-999		-0.00237	259	0.463	0.071	0.409	0.09225	0.0545	0.0564	0.1586	0.05665	0.1218	0	0	0	0	4.1
263.125	263.132	2010-09-21 03:00:00	2010-09-21 03:09:59		-999		0.00962	256	0.468	0.072	0.413	0.0863	0.05455	0.0509	0.1596	0.05875	0.1206	0	0	0	0	4.1
263.132	263.139	2010-09-21 03:09:59	2010-09-21 03:20:00		-999		0.0101	265	0.475	0.072	0.419	0.0805	0.0527	0.04995	0.1618	0.05935	0.12165	0	0	0	0	3.5
263.139	263.146	2010-09-21 03:20:00	2010-09-21 03:29:59		-999		0.00913	276	0.479	0.072	0.423	0.07225	0.05145	0.04455	0.1665	0.06075	0.12405	0	0	0	0	3
263.146	263.153	2010-09-21 03:29:59	2010-09-21 03:40:00		-999		0.00146	277	0.485	0.073	0.428	0.0645	0.05125	0.0396	0.16615	0.05945	0.1323	0	0	0	0	3.3
263.153	263.16	2010-09-21 03:40:00	2010-09-21 03:49:59		-999		0.00877	270	0.491	0.073	0.432	0.0612	0.0493	0.03965	0.16325	0.0592	0.13445	0	0	0	0	3.1
263.16	263.167	2010-09-21 03:49:59	2010-09-21 04:00:00		-999		0.01664	277	0.496	0.075	0.436	0.05675	0.05405	0.03745	0.15865	0.06155	0.1396	0	0	0	0	3
263.167	263.174	2010-09-21 04:00:00	2010-09-21 04:09:59		-999		-0.00047	276	0.502	0.076	0.441	0.0519	0.05415	0.0385	0.1544	0.0669	0.14295	0	0	0	0	3.1
263.174	263.181	2010-09-21 04:09:59	2010-09-21 04:20:00		-999		0.00702	280	0.506	0.078	0.443	0.0471	0.051	0.0383	0.1503	0.0678	0.14275	0	0	0	0	3.7
263.181	263.188	2010-09-21 04:20:00	2010-09-21 04:30:00		-999		-0.00052	286	0.511	0.079	0.447	0.0466	0.0468	0.04	0.14515	0.0675	0.1409	0	0	0	0	3.8
263.188	263.194	2010-09-21 04:30:00	2010-09-21 04:39:59		-999		0.00034	280	0.516	0.081	0.451	0.0489	0.04595	0.045	0.14045	0.0639	0.1416	0	0	0	0	3.4
263.194	263.201	2010-09-21 04:39:59	2010-09-21 04:50:00		-999		0.0058	280	0.522	0.081	0.456	0.0567	0.04405	0.05355	0.14015	0.06045	0.1472	0	0	0	0	2.8
263.201	263.208	2010-09-21 04:50:00	2010-09-21 04:59:59		-999		-0.00229	289	0.526	0.082	0.459	0.07135	0.0484	0.08315	0.1391	0.0588	0.1462	0	0	0	0	2.5
263.208	263.215	2010-09-21 04:59:59	2010-09-21 05:10:00		-999		0.0006	292	0.526	0.082	0.462	0.0868	0.049	0.0978	0.1408	0.05755	0.1499	0	0	0	0	2.3
263.215	263.222	2010-09-21 05:10:00	2010-09-21 05:19:59		-999		0.0036	301	0.526	0.083	0.464	0.0982	0.0499	0.10305	0.13965	0.0577	0.1492	0	0	0	0	2.2
263.222	263.229	2010-09-21 05:19:59	2010-09-21 05:30:00		-999		0.00547	308	0.527	0.085	0.464	0.10115	0.0497	0.1047	0.13225	0.0553	0.14475	0	0	0	0	2.3
263.229	263.236	2010-09-21 05:30:00	2010-09-21 05:39:59		-999		0.00608	313	0.529	0.085	0.467	0.102	0.0489	0.10465	0.1271	0.0548	0.1362	0	0	0	0	2.3
263.236	263.243	2010-09-21 05:39:59	2010-09-21 05:50:00		-999		0.00283	314	0.531	0.085	0.469	0.1023	0.04895	0.1039	0.1248	0.05435	0.1315	0	0	0	0	2.3
263.243	263.25	2010-09-21 05:50:00	2010-09-21 06:00:00		-999		0.00427	324	0.532	0.084	0.47	0.11085	0.0496	0.1052	0.1243	0.04775	0.1243	0	0	0	0	2.1
263.25	263.257	2010-09-21 06:00:00	2010-09-21 06:09:59		-999		0.00046	317	0.532	0.085	0.47	0.1166	0.0482	0.10745	0.1266	0.0413	0.11765	0	0	0	0	2.3
263.257	263.264	2010-09-21 06:09:59	2010-09-21 06:20:00		-999		0.0013	325	0.533	0.084	0.472	0.12015	0.0487	0.1112	0.12765	0.0407	0.1141	0	0	0	0	2.1
263.264	263.271	2010-09-21 06:20:00	2010-09-21 06:29:59		-999		0.00084	324	0.535	0.083	0.475	0.126	0.0524	0.1121	0.13365	0.0468	0.11145	0	0	0	0	1.9
263.271	263.278	2010-09-21 06:29:59	2010-09-21 06:40:00		-999		0.0029	338	0.535	0.081	0.477	0.13155	0.05665	0.112	0.1362	0.05245	0.1069	0	0	0	0	1.6
263.278	263.285	2010-09-21 06:40:00	2010-09-21 06:49:59		-999		0.00265	335	0.535	0.079	0.48	0.1311	0.06045	0.11095	0.1321	0.0607	0.09505	0	0	0	0	1.9
263.285	263.292	2010-09-21 06:49:59	2010-09-21 07:00:00		-999		2e-05	329	0.532	0.075	0.479	0.12765	0.0612	0.0913	0.1312	0.065	0.09035	0	0	0	0	2.2
263.292	263.299	2010-09-21 07:00:00	2010-09-21 07:09:59		-999		0.0045	317	0.528	0.076	0.475	0.13385	0.1542	0.1548	0.1227	0.0825	0.0781	0	0	0	0	2
263.299	263.306	2010-09-21 07:09:59	2010-09-21 07:20:00		-999		0.00324	311	0.523	0.075	0.47	0.1383	0.16575	0.17275	0.1151	0.08295	0.0688	0	0	0	0	1.9
263.306	263.312	2010-09-21 07:20:00	2010-09-21 07:30:00		-999		-0.00038	317	0.518	0.076	0.464	0.14305	0.1678	0.17535	0.1103	0.08795	0.06905	0	0	0	0	1.5
263.312	263.319	2010-09-21 07:30:00	2010-09-21 07:39:59		-999		0.00179	321	0.512	0.076	0.458	0.16375	0.1818	0.1779	0.11395	0.0968	0.0658	0	0	0	0	1.4
263.319	263.326	2010-09-21 07:39:59	2010-09-21 07:50:00		-999		0.0024	328	0.505	0.077	0.451	0.1872	0.1956	0.185	0.1212	0.10215	0.0652	0	0	0	0	1.6
263.326	263.333	2010-09-21 07:50:00	2010-09-21 07:59:59		-999		0.00525	327	0.498	0.076	0.444	0.183	0.1944	0.1884	0.122	0.10525	0.0702	0	0	0	0	1.6
263.333	263.34	2010-09-21 07:59:59	2010-09-21 08:10:00		-999		0.00745	328	0.487	0.076	0.433	0.18025	0.19635	0.1874	0.1193	0.11135	0.07515	0	0	0	0	1.6
263.34	263.347	2010-09-21 08:10:00	2010-09-21 08:19:59		-999		0.0013	325	0.477	0.076	0.433	0.17825	0.1986	0.18595	0.1187	0.1254	0.0838	0	0	0	0	1.9
263.347	263.354	2010-09-21 08:19:59	2010-09-21 08:30:00		-999		0.00728	314	0.465	0.075	0.421	0.1763	0.20285	0.1862	0.1095	0.1364	0.09425	0	0	0	0	1.9
263.354	263.361	2010-09-21 08:30:00	2010-09-21 08:39:59		-999		0.00097	300	0.452	0.074	0.409	0.1735	0.21215	0.1919	0.1034	0.15015	0.10585	0	0	0	0	1.4
263.361	263.368	2010-09-21 08:39:59	2010-09-21 08:50:00		-999		0.00381	306	0.44	0.073	0.397	0.1725	0.2219	0.19785	0.1043	0.1737	0.11965	0	0	0	0	0.7
263.368	263.375	2010-09-21 08:50:00	2010-09-21 09:00:00		-999		0.0023	328	0.428	0.073	0.394	0.16925	0.23555	0.21405	0.0953	0.1873	0.1348	0	0	0	0	0.6
263.375	263.382	2010-09-21 09:00:00	2010-09-21 09:09:59		-999		0.0035	324	0.414	0.072	0.38	0.1565	0.2015	0.1914	0.09145	0.20555	0.16205	0	0	0	0	0.6
263.382	263.389	2010-09-21 09:09:59	2010-09-21 09:20:00		-999		0.0029	267	0.401	0.068	0.369	0.14605	0.2016	0.1837	0.0902	0.2195	0.1718	0	0	0	0	0.5
263.389	263.396	2010-09-21 09:20:00	2010-09-21 09:29:59		-999		0.003	262	0.386	0.065	0.365	0.1532	0.20965	0.18825	0.103	0.22755	0.17695	0	0	0	0	0.6
263.396	263.403	2010-09-21 09:29:59	2010-09-21 09:40:00		-999		0.00424	243	0.37	0.064	0.349	0.13635	0.2038	0.1947	0.11625	0.23485	0.18605	0	0	0	0	1.3
263.403	263.41	2010-09-21 09:40:00	2010-09-21 09:49:59		-999		0.00283	232	0.354	0.062	0.333	0.1064	0.19775	0.19655	0.1144	0.24535	0.1965	0	0	0	0	1.4
263.41	263.417	2010-09-21 09:49:59	2010-09-21 10:00:00		-999		0.00226	226	0.337	0.06	0.316	0.14	0.2108	0.2031	0.1322	0.25875	0.2069	0	0	0	0	1.1
263.417	263.424	2010-09-21 10:00:00	2010-09-21 10:09:59		-999		0.0024	233	0.32	0.056	0.302	0.15725	0.11015	0.10705	0.14715	0.13475	0.1078	0	0	0	0	0.9
263.424	263.431	2010-09-21 10:09:59	2010-09-21 10:20:00		-999		-0.00142	237	0.301	0.055	0.281	0.1631	-999	-999	0.156	-999	-999	0	0	0	0	0.8
263.431	263.438	2010-09-21 10:20:00	2010-09-21 10:30:00		-999		0.00102	300	0.278	0.056	0.256	0.16075	-999	-999	0.15945	-999	-999	0	0	0	0	1.3
263.438	263.444	2010-09-21 10:30:00	2010-09-21 10:39:59		-999		0.00134	258	0.253	0.056	0.226	0.15885	-999	-999	0.1589	-999	-999	0	0	0	0	0.8
263.444	263.451	2010-09-21 10:39:59	2010-09-21 10:50:00		-999		0	315	0.231	0.06	0.197	0.1602	-999	-999	0.1544	-999	-999	0	0	0	0	1.3
263.451	263.458	2010-09-21 10:50:00	2010-09-21 10:59:59		-999		-0.00025	280	0.213	0.063	0.175	0.16135	-999	-999	0.1531	-999	-999	0	0	0	0	2
263.458	263.465	2010-09-21 10:59:59	2010-09-21 11:10:00		-999		-0.00106	281	0.195	0.079	0.161	0.1615	-999	-999	0.15205	-999	-999	0	0	0	0	1.7
263.465	263.472	2010-09-21 11:10:00	2010-09-21 11:19:59		-999		0.00147	271	0.179	0.085	0.142	0.1615	-999	-999	0.1509	-999	-999	0	0	0	0	1.7
263.472	263.479	2010-09-21 11:19:59	2010-09-21 11:30:00		-999		-0.00071	231	0.165	0.084	0.13	0.14875	-999	-999	0.1428	-999	-999	0	0	0	0	2
263.479	263.486	2010-09-21 11:30:00	2010-09-21 11:39:59		-999		0.00277	213	0.148	0.085	0.111	0.1415	-999	-999	0.1283	-999	-999	0	0	0	0	2.6
263.486	263.493	2010-09-21 11:39:59	2010-09-21 11:50:00		-999		-0.00885	238	0.131	0.087	0.096	0.1375	-999	-999	0.12285	-999	-999	0	0	0	0	2.6
263.493	263.5	2010-09-21 11:50:00	2010-09-21 12:00:00		-999		0.0011	213	0.115	0.088	0.08	0.1029	-999	-999	0.1025	-999	-999	0	0	0	0	3.2
263.5	263.507	2010-09-21 12:00:00	2010-09-21 12:09:59		-999		-0.00225	212	0.108	0.088	0.078	0.077	-999	-999	0.08005	-999	-999	0	0	0	0	3.1
263.507	263.514	2010-09-21 12:09:59	2010-09-21 12:20:00		-999		0.006	222	0.101	0.088	0.078	0.06865	-999	-999	0.06175	-999	-999	0	0	0	0	3.5
263.514	263.521	2010-09-21 12:20:00	2010-09-21 12:29:59		-999		-0.00025	228	0.095	0.088	0.075	0.07705	-999	-999	0.0518	-999	-999	0	0	0	0	3.3
263.521	263.528	2010-09-21 12:29:59	2010-09-21 12:40:00		-999		-0.0007	237	0.091	0.089	0.075	0.08735	-999	-999	0.05225	-999	-999	0	0	0	0	3.1
263.528	263.535	2010-09-21 12:40:00	2010-09-21 12:49:59		-999		0.00053	218	0.083	0.09	0.073	0.089	-999	-999	0.0515	-999	-999	0	0	0	0	2.4
263.535	263.542	2010-09-21 12:49:59	2010-09-21 13:00:00		-999		-0.00135	260	0.077	0.091	0.073	0.08755	-999	-999	0.04885	-999	-999	0	0	0	0	2.4
263.542	263.549	2010-09-21 13:00:00	2010-09-21 13:09:59		-999		0.00462	215	0.073	0.091	0.071	0.0902	-999	-999	0.0501	-999	-999	0	0	0	0	2
263.549	263.556	2010-09-21 13:09:59	2010-09-21 13:20:00		-999		-0.00163	214	0.068	0.093	0.068	0.09195	-999	-999	0.05255	-999	-999	0	0	0	0	2.9
263.556	263.562	2010-09-21 13:20:00	2010-09-21 13:30:00		-999		0.00267	203	0.067	0.091	0.066	0.09475	-999	-999	0.0502	-999	-999	0	0	0	0	1.7
263.562	263.569	2010-09-21 13:30:00	2010-09-21 13:39:59		-999		-0.00121	234	0.064	0.092	0.065	0.09855	-999	-999	0.04895	-999	-999	0	0	0	0	2.4
263.569	263.576	2010-09-21 13:39:59	2010-09-21 13:50:00		-999		0.0009	216	0.062	0.094	0.066	0.1101	-999	-999	0.05115	-999	-999	0	0	0	0	1.2
263.576	263.583	2010-09-21 13:50:00	2010-09-21 13:59:59		-999		-0.00187	249	0.06	0.1	0.071	0.12605	-999	-999	0.0541	-999	-999	0	0	0	0	0.6
263.583	263.59	2010-09-21 13:59:59	2010-09-21 14:10:00		-999		0.0029	288	0.059	0.101	0.075	0.14275	-999	-999	0.06765	-999	-999	0	0	0	0	1
263.59	263.597	2010-09-21 14:10:00	2010-09-21 14:19:59		-999		0.00105	338	0.055	0.104	0.077	0.15205	-999	-999	0.0736	-999	-999	0	0	0	0	1.5
263.597	263.604	2010-09-21 14:19:59	2010-09-21 14:30:00		-999		0.00026	339	0.053	0.104	0.08	0.15755	-999	-999	0.0786	-999	-999	0	0	0	0	1.1
263.604	263.611	2010-09-21 14:30:00	2010-09-21 14:39:59		-999		0.00175	12	0.051	0.104	0.08	0.15435	-999	-999	0.08485	-999	-999	0	0	0	0	1
263.611	263.618	2010-09-21 14:39:59	2010-09-21 14:50:00		-999		0.00056	23	0.048	0.102	0.082	0.15115	-999	-999	0.09075	-999	-999	0	0	0	0	0.5
263.618	263.625	2010-09-21 14:50:00	2010-09-21 15:00:00		-999		-0.00252	24	0.053	0.1	0.085	0.15705	0.1211	0.055	0.09645	0.117	0.1242	0	0	0	0	0.8
263.625	263.632	2010-09-21 15:00:00	2010-09-21 15:09:59		-999		0.00154	8	0.06	0.086	0.084	0.1604	0.22895	0.1047	0.09975	0.22165	0.2352	0	0	0	0	0.2
263.632	263.639	2010-09-21 15:09:59	2010-09-21 15:20:00		-999		0.0032	23	0.07	0.079	0.093	0.1594	0.21415	0.10105	0.1009	0.2082	0.22055	0	0	0	0	0.3
263.639	263.646	2010-09-21 15:20:00	2010-09-21 15:29:59		-999		0.00334	44	0.085	0.078	0.104	0.15775	0.2025	0.0993	0.10185	0.1964	0.20885	0	0	0	0	0.9
263.646	263.653	2010-09-21 15:29:59	2010-09-21 15:40:00		-999		-0.00014	34	0.101	0.076	0.12	0.15485	0.19255	0.09465	0.1023	0.19325	0.2051	0	0	0	0	0.4
263.653	263.66	2010-09-21 15:40:00	2010-09-21 15:49:59		-999		-0.00528	30	0.119	0.073	0.133	0.1475	0.18455	0.0904	0.10035	0.19095	0.20185	0	0	0	0	0.3
263.66	263.667	2010-09-21 15:49:59	2010-09-21 16:00:00		-999		0.00572	31	0.136	0.07	0.145	0.14335	0.1799	0.08905	0.0982	0.18335	0.1934	0	0	0	0	0.3
263.667	263.674	2010-09-21 16:00:00	2010-09-21 16:09:59		-999		0.0031	21	0.155	0.07	0.157	0.12975	0.1724	0.08785	0.0889	0.1821	0.1905	0	0	0	0	0.1
263.674	263.681	2010-09-21 16:09:59	2010-09-21 16:20:00		-999		0.00415	4	0.18	0.072	0.171	0.1158	0.15155	0.089	0.0821	0.13445	0.1519	0	0	0	0	0
263.681	263.688	2010-09-21 16:20:00	2010-09-21 16:30:00		-999		0.0021	10	0.197	0.075	0.182	0.1024	0.13475	0.0949	0.0791	0.0856	0.1137	0	0	0	0	0
263.688	263.694	2010-09-21 16:30:00	2010-09-21 16:39:59		-999		0.00312	38	0.216	0.08	0.188	0.10075	0.1275	0.0923	0.0774	0.08835	0.1079	0	0	0	0	0.3
263.694	263.701	2010-09-21 16:39:59	2010-09-21 16:50:00		-999		-0.0039	21	0.232	0.083	0.196	0.10285	0.12455	0.09635	0.0723	0.0885	0.1023	0	0	0	0	0.1
263.701	263.708	2010-09-21 16:50:00	2010-09-21 16:59:59		-999		0.00175	32	0.247	0.085	0.205	0.09245	0.1176	0.10535	0.06725	0.0878	0.09155	0	0	0	0	0.9
263.708	263.715	2010-09-21 16:59:59	2010-09-21 17:10:00		-999		-0.00106	26	0.262	0.089	0.214	0.08415	0.1288	0.14	0.06385	0.08945	0.09005	0	0	0	0	0.6
263.715	263.722	2010-09-21 17:10:00	2010-09-21 17:19:59		-999		0.00038	27	0.272	0.093	0.218	0.0848	0.1458	0.16245	0.06185	0.08775	0.0889	0	0	0	0	0.3
263.722	263.729	2010-09-21 17:19:59	2010-09-21 17:30:00		-999		-4e-05	7	0.279	0.098	0.221	0.0858	0.1653	0.18605	0.063	0.0902	0.0928	0	0	0	0	0.7
263.729	263.736	2010-09-21 17:30:00	2010-09-21 17:39:59		-999		0.0208	27	0.286	0.101	0.224	0.1161	0.1731	0.1923	0.06255	0.09185	0.0962	0	0	0	0	1.4
263.736	263.743	2010-09-21 17:39:59	2010-09-21 17:50:00		-999		0.00541	33	0.295	0.101	0.229	0.11535	0.1778	0.2015	0.0632	0.14295	0.14565	0	0	0	0	1.4
263.743	263.75	2010-09-21 17:50:00	2010-09-21 18:00:00		-999		-5e-05	29	0.301	0.1	0.229	0.10215	0.1993	0.2261	0.06435	0.19425	0.20315	0	0	0	0	1.3
263.75	263.757	2010-09-21 18:00:00	2010-09-21 18:09:59		-999		-0.00487	28	0.306	0.103	0.23	0.09845	0.19915	0.2295	0.0641	0.229	0.24055	0	0	0	0	1.6
263.757	263.764	2010-09-21 18:09:59	2010-09-21 18:20:00		-999		-0.0018	44	0.312	0.103	0.231	0.11875	0.20315	0.2509	0.06545	0.29425	0.309	0	0	0	0	1.2
263.764	263.771	2010-09-21 18:20:00	2010-09-21 18:29:59		-999		-0.00254	41	0.318	0.106	0.234	0.14275	0.2261	0.2979	0.0639	0.33025	0.34705	0	0	0	0	1.3
263.771	263.778	2010-09-21 18:29:59	2010-09-21 18:40:00		-999		0.00142	31	0.324	0.109	0.236	0.14465	0.24845	0.32545	0.0608	0.33805	0.3592	0	0	0	0	1.4
263.778	263.785	2010-09-21 18:40:00	2010-09-21 18:49:59		-999		0.00125	33	0.328	0.112	0.237	0.1458	0.26025	0.3401	0.06675	0.3477	0.37465	0	0	0	0	1.5
263.785	263.792	2010-09-21 18:49:59	2010-09-21 19:00:00		-999		0	25	0.333	0.116	0.238	0.1467	0.25635	0.3383	0.07205	0.35125	0.38295	0	0	0	0	1.7
263.792	263.799	2010-09-21 19:00:00	2010-09-21 19:09:59		-999		0.0048	29	0.335	0.118	0.239	0.14715	0.2485	0.3323	0.0782	0.3547	0.3929	0	0	0	0	1.7
263.799	263.806	2010-09-21 19:09:59	2010-09-21 19:20:00		-999		0.00179	29	0.336	0.119	0.237	0.15105	0.23945	0.32575	0.08485	0.3566	0.39885	0	0	0	0	2
263.806	263.812	2010-09-21 19:20:00	2010-09-21 19:30:00		-999		0.00035	26	0.335	0.121	0.234	0.1522	0.22625	0.3137	0.09185	0.35665	0.40215	0	0	0	0	2
263.812	263.819	2010-09-21 19:30:00	2010-09-21 19:39:59		-999		-0.00113	35	0.333	0.123	0.228	0.1347	0.21985	0.3113	0.09855	0.3538	0.40205	0	0	0	0	2.2
263.819	263.826	2010-09-21 19:39:59	2010-09-21 19:50:00		-999		-0.0021	49	0.33	0.125	0.222	0.13865	0.24625	0.33735	0.1093	0.33695	0.39495	0	0	0	0	2.2
263.826	263.833	2010-09-21 19:50:00	2010-09-21 19:59:59		-999		4e-05	52	0.325	0.126	0.215	0.14175	0.25605	0.34995	0.1135	0.3149	0.3779	0	0	0	0	2.4
263.833	263.84	2010-09-21 19:59:59	2010-09-21 20:10:00		-999		-0.00288	45	0.319	0.126	0.208	0.1417	0.2787	0.37	0.1195	0.295	0.3663	0	0	0	0	2.6
263.84	263.847	2010-09-21 20:10:00	2010-09-21 20:19:59		-999		-0.00735	42	0.309	0.126	0.195	0.1245	0.2741	0.35505	0.12365	0.22915	0.3145	0	0	0	0	2.7
263.847	263.854	2010-09-21 20:19:59	2010-09-21 20:30:00		-999		-0.00025	49	0.301	0.125	0.188	0.0987	0.2529	0.31585	0.12365	0.1756	0.27285	0	0	0	0	2.5
263.854	263.861	2010-09-21 20:30:00	2010-09-21 20:39:59		-999		0.00473	47	0.292	0.123	0.179	0.09435	0.2294	0.28775	0.1233	0.1578	0.2564	0	0	0	0	2.6
263.861	263.868	2010-09-21 20:39:59	2010-09-21 20:50:00		-999		0.00242	42	0.283	0.123	0.171	0.0902	0.2144	0.2678	0.1216	0.136	0.2345	0	0	0	0	2.5
263.868	263.875	2010-09-21 20:50:00	2010-09-21 21:00:00		-999		-0.003	47	0.279	0.121	0.167	0.08865	0.2122	0.26345	0.11815	0.12735	0.2232	0	0	0	0	2.4
263.875	263.882	2010-09-21 21:00:00	2010-09-21 21:09:59		-999		-0.00063	47	0.272	0.12	0.161	0.086	0.2071	0.2543	0.11355	0.11715	0.20785	0	0	0	0	2.9
263.882	263.889	2010-09-21 21:09:59	2010-09-21 21:20:00		-999		0.0016	49	0.266	0.117	0.157	0.0779	0.20605	0.24855	0.1088	0.1145	0.20035	0	0	0	0	3.1
263.889	263.896	2010-09-21 21:20:00	2010-09-21 21:29:59		-999		-0.00366	47	0.26	0.114	0.154	0.0739	0.20595	0.24675	0.103	0.11315	0.19345	0	0	0	0	2.9
263.896	263.903	2010-09-21 21:29:59	2010-09-21 21:40:00		-999		-0.00459	53	0.255	0.112	0.151	0.0661	0.2059	0.24515	0.0966	0.1123	0.1879	0	0	0	0	3.1
263.903	263.91	2010-09-21 21:40:00	2010-09-21 21:49:59		-999		-0.00957	57	0.247	0.11	0.144	0.05595	0.16755	0.19915	0.0852	0.1015	0.1665	0	0	0	0	2.8
263.91	263.917	2010-09-21 21:49:59	2010-09-21 22:00:00		-999		-0.00595	65	0.242	0.107	0.142	0.0474	0.11045	0.1388	0.07935	0.08825	0.1483	0	0	0	0	2.9
263.917	263.924	2010-09-21 22:00:00	2010-09-21 22:09:59		-999		-0.00425	57	0.237	0.104	0.139	0.042	0.04215	0.07075	0.0698	0.0759	0.12175	0	0	0	0	3
263.924	263.931	2010-09-21 22:09:59	2010-09-21 22:20:00		-999		-0.00117	65	0.231	0.102	0.137	0.03995	0.0373	0.06185	0.0619	0.07685	0.11125	0	0	0	0	2.8
263.931	263.938	2010-09-21 22:20:00	2010-09-21 22:30:00		-999		0.00642	63	0.225	0.098	0.134	0.03875	0.03905	0.06105	0.0605	0.0793	0.11425	0	0	0	0	2.8
263.938	263.944	2010-09-21 22:30:00	2010-09-21 22:39:59		-999		-0.00034	67	0.218	0.095	0.131	0.0391	0.0427	0.06595	0.0599	0.08255	0.12035	0	0	0	0	3
263.944	263.951	2010-09-21 22:39:59	2010-09-21 22:50:00		-999		0.0005	65	0.212	0.091	0.128	0.04015	0.0421	0.06605	0.0594	0.0837	0.1253	0	0	0	0	3
263.951	263.958	2010-09-21 22:50:00	2010-09-21 22:59:59		-999		-0.00104	62	0.203	0.086	0.124	0.04145	0.042	0.0658	0.0629	0.085	0.1302	0	0	0	0	2.8
263.958	263.965	2010-09-21 22:59:59	2010-09-21 23:10:00				-0.003	63	0.197	0.084	0.12	0.04295	0.04235	0.0685	0.06915	0.0834	0.1306	0	0	0	0	2.8
263.965	263.972	2010-09-21 23:10:00	2010-09-21 23:19:59				0.00325	62	0.193	0.082	0.117	0.0502	0.0446	0.0702	0.0754	0.0798	0.12725	0	0	0	0	3.4
263.972	263.979	2010-09-21 23:19:59	2010-09-21 23:30:00				-0.00134	65	0.189	0.08	0.116	0.05185	0.0452	0.0722	0.07485	0.07885	0.12695	0	0	0	0	3.4
263.979	263.986	2010-09-21 23:30:00	2010-09-21 23:39:59				-0.00502	67	0.185	0.078	0.114	0.05805	0.04595	0.07475	0.0757	0.07795	0.1266	0	0	0	0	3.5
263.986	263.993	2010-09-21 23:39:59	2010-09-21 23:50:00				-9e-05	65	0.18	0.076	0.112	0.06565	0.04875	0.0733	0.0776	0.0752	0.12445	0	0	0	0	3.1
263.993	264	2010-09-21 23:50:00	2010-09-22				0.0005	67	0.178	0.076	0.11	0.0731	0.0536	0.06995	0.08135	0.0714	0.12435	0	0	0	0	3.2
264	264.007	2010-09-22	2010-09-22 00:09:59				-0.00275	70	0.174	0.077	0.107	0.0749	0.0596	0.06885	0.0869	0.06215	0.12145	0	0	0	0	3.2
264.007	264.014	2010-09-22 00:09:59	2010-09-22 00:20:00				0.0007	73	0.17	0.077	0.104	0.077	0.06325	0.0681	0.09275	0.0575	0.1212	0	0	0	0	2.9
264.014	264.021	2010-09-22 00:20:00	2010-09-22 00:29:59				0.00063	82	0.168	0.077	0.102	0.0774	0.06415	0.0616	0.09985	0.0551	0.12205	0	0	0	0	3.2
264.021	264.028	2010-09-22 00:29:59	2010-09-22 00:40:00				-0.00206	86	0.164	0.076	0.099	0.0764	0.0619	0.05365	0.10505	0.0513	0.1173	0	0	0	0	3.5
264.028	264.035	2010-09-22 00:40:00	2010-09-22 00:49:59				0.00513	85	0.16	0.072	0.099	0.0753	0.06145	0.04965	0.10865	0.04915	0.11205	0	0	0	0	3.1
264.035	264.042	2010-09-22 00:49:59	2010-09-22 01:00:00				-0.0033	82	0.149	0.072	0.087	0.0741	0.06155	0.04915	0.11125	0.0426	0.10545	0	0	0	0	2.9
264.042	264.049	2010-09-22 01:00:00	2010-09-22 01:09:59				-0.00402	88	0.142	0.072	0.079	0.07305	0.06095	0.04575	0.10905	0.04105	0.1026	0	0	0	0	3.1
264.049	264.056	2010-09-22 01:09:59	2010-09-22 01:20:00				-0.00592	82	0.144	0.073	0.08	0.06745	0.05975	0.0431	0.108	0.04045	0.1014	0	0	0	0	3.1
264.056	264.062	2010-09-22 01:20:00	2010-09-22 01:30:00				-0.004	90	0.148	0.074	0.082	0.06585	0.05925	0.03995	0.10985	0.03925	0.10295	0	0	0	0	3.3
264.062	264.069	2010-09-22 01:30:00	2010-09-22 01:39:59				-0.00196	85	0.151	0.076	0.084	0.05895	0.05875	0.03365	0.11845	0.039	0.1106	0	0	0	0	3.2
264.069	264.076	2010-09-22 01:39:59	2010-09-22 01:50:00				-0.0017	90	0.157	0.079	0.086	0.04925	0.0547	0.03125	0.12615	0.04085	0.1144	0	0	0	0	3
264.076	264.083	2010-09-22 01:50:00	2010-09-22 01:59:59				-0.005	90	0.165	0.082	0.091	0.03615	0.04785	0.03105	0.1353	0.0419	0.1178	0	0	0	0	2.9
264.083	264.09	2010-09-22 01:59:59	2010-09-22 02:10:00				-0.00059	90	0.165	0.084	0.093	0.0318	0.03815	0.0304	0.14305	0.0457	0.1237	0	0	0	0	2.8
264.09	264.097	2010-09-22 02:10:00	2010-09-22 02:19:59				0.0008	90	0.165	0.085	0.098	0.02955	0.02815	0.03375	0.14635	0.04755	0.1269	0	0	0	0	2.7
264.097	264.104	2010-09-22 02:19:59	2010-09-22 02:30:00				-0.00459	90	0.165	0.086	0.107	0.02725	0.017	0.0339	0.15015	0.0475	0.1325	0	0	0	0	2.9
264.104	264.111	2010-09-22 02:30:00	2010-09-22 02:39:59				-0.00643	90	0.181	0.091	0.115	0.0301	0.0157	0.03665	0.16	0.0497	0.13735	0	0	0	0	2.7
264.111	264.118	2010-09-22 02:39:59	2010-09-22 02:50:00				0.00387	87	0.19	0.095	0.119	0.0372	0.0159	0.044	0.167	0.0509	0.14545	0	0	0	0	2.9
264.118	264.125	2010-09-22 02:50:00	2010-09-22 03:00:00		-999		-0.00422	90	0.201	0.099	0.125	0.0405	0.01555	0.0477	0.17375	0.0533	0.152	0	0	0	0	2.7
264.125	264.132	2010-09-22 03:00:00	2010-09-22 03:09:59		-999		0.00067	90	0.213	0.102	0.133	0.04905	0.01685	0.0571	0.1784	0.05545	0.15765	0	0	0	0	2.6
264.132	264.139	2010-09-22 03:09:59	2010-09-22 03:20:00		-999		-0.0047	90	0.226	0.105	0.142	0.0551	0.02	0.06595	0.177	0.06465	0.16525	0	0	0	0	2.6
264.139	264.146	2010-09-22 03:20:00	2010-09-22 03:29:59		-999		-0.01129	90	0.24	0.109	0.15	0.0575	0.02225	0.06815	0.1765	0.06805	0.16785	0	0	0	0	2.4
264.146	264.153	2010-09-22 03:29:59	2010-09-22 03:40:00		-999		-0.0019	90	0.254	0.113	0.159	0.05805	0.0286	0.06985	0.1703	0.0723	0.1642	0	0	0	0	2.6
264.153	264.16	2010-09-22 03:40:00	2010-09-22 03:49:59		-999		0.00133	90	0.269	0.117	0.168	0.0583	0.0379	0.07485	0.1635	0.07665	0.1639	0	0	0	0	2.3
264.16	264.167	2010-09-22 03:49:59	2010-09-22 04:00:00		-999		0.00095	92	0.282	0.121	0.175	0.058	0.04645	0.08075	0.1545	0.07955	0.16305	0	0	0	0	2.3
264.167	264.174	2010-09-22 04:00:00	2010-09-22 04:09:59		-999		0.00863	90	0.293	0.124	0.182	0.05855	0.0482	0.08325	0.1441	0.08175	0.1613	0	0	0	0	2.3
264.174	264.181	2010-09-22 04:09:59	2010-09-22 04:20:00		-999		-0.00175	90	0.302	0.126	0.188	0.0664	0.0488	0.0901	0.137	0.083	0.16065	0	0	0	0	2.3
264.181	264.188	2010-09-22 04:20:00	2010-09-22 04:30:00		-999		-0.00565	94	0.308	0.127	0.193	0.07655	0.0491	0.0992	0.13045	0.0832	0.15655	0	0	0	0	2.1
264.188	264.194	2010-09-22 04:30:00	2010-09-22 04:39:59		-999		0.00046	87	0.316	0.129	0.198	0.08455	0.0534	0.11385	0.114	0.0815	0.15385	0	0	0	0	1.8
264.194	264.201	2010-09-22 04:39:59	2010-09-22 04:50:00		-999		0.002	92	0.323	0.13	0.203	0.0828	0.068	0.12265	0.09985	0.0844	0.1528	0	0	0	0	1.7
264.201	264.208	2010-09-22 04:50:00	2010-09-22 04:59:59		-999		0.005	97	0.332	0.132	0.21	0.08275	0.08305	0.13595	0.0843	0.08585	0.15045	0	0	0	0	1.6
264.208	264.215	2010-09-22 04:59:59	2010-09-22 05:10:00		-999		-0.00298	90	0.339	0.133	0.216	0.0832	0.0935	0.15015	0.0873	0.09575	0.14705	0	0	0	0	1.8
264.215	264.222	2010-09-22 05:10:00	2010-09-22 05:19:59		-999		-0.00665	92	0.346	0.134	0.221	0.0868	0.09465	0.1513	0.1053	0.09815	0.139	0	0	0	0	2
264.222	264.229	2010-09-22 05:19:59	2010-09-22 05:30:00		-999		-0.00313	92	0.352	0.134	0.226	0.0952	0.0949	0.1596	0.10865	0.09725	0.13625	0	0	0	0	2
264.229	264.236	2010-09-22 05:30:00	2010-09-22 05:39:59		-999		0.00363	96	0.357	0.134	0.232	0.1057	0.10355	0.1644	0.11345	0.09505	0.13535	0	0	0	0	1.8
264.236	264.243	2010-09-22 05:39:59	2010-09-22 05:50:00		-999		-0.0007	90	0.362	0.135	0.237	0.1065	0.1094	0.1714	0.1203	0.0905	0.1373	0	0	0	0	1.7
264.243	264.25	2010-09-22 05:50:00	2010-09-22 06:00:00		-999		-0.00145	90	0.365	0.135	0.246	0.10645	0.1145	0.1733	0.1219	0.0872	0.1333	0	0	0	0	1.7
264.25	264.257	2010-09-22 06:00:00	2010-09-22 06:09:59		-999		-0.00229	97	0.365	0.135	0.251	0.10605	0.11615	0.17325	0.1222	0.08435	0.13015	0	0	0	0	1.6
264.257	264.264	2010-09-22 06:09:59	2010-09-22 06:20:00		-999		0.0067	88	0.365	0.135	0.257	0.10035	0.118	0.17085	0.1215	0.0832	0.12715	0	0	0	0	1.8
264.264	264.271	2010-09-22 06:20:00	2010-09-22 06:29:59		-999		4e-05	100	0.365	0.135	0.259	0.09455	0.118	0.16705	0.1211	0.0827	0.12605	0	0	0	0	1.7
264.271	264.278	2010-09-22 06:29:59	2010-09-22 06:40:00		-999		0.00295	116	0.365	0.135	0.261	0.09565	0.1163	0.1626	0.12135	0.0825	0.1259	0	0	0	0	1.7
264.278	264.285	2010-09-22 06:40:00	2010-09-22 06:49:59		-999		0.00035	120	0.369	0.135	0.264	0.10335	0.10895	0.1582	0.12375	0.07905	0.1171	0	0	0	0	2
264.285	264.292	2010-09-22 06:49:59	2010-09-22 07:00:00		-999		-0.00281	116	0.373	0.136	0.265	0.11275	0.10095	0.1476	0.1284	0.0811	0.10805	0	0	0	0	2.5
264.292	264.299	2010-09-22 07:00:00	2010-09-22 07:09:59		-999		-0.0011	114	0.375	0.137	0.263	0.1162	0.09515	0.1298	0.1202	0.06895	0.10245	0	0	0	0	2.4
264.299	264.306	2010-09-22 07:09:59	2010-09-22 07:20:00		-999		-0.00165	120	0.377	0.138	0.261	0.1199	0.09715	0.1252	0.1122	0.0604	0.1003	0	0	0	0	2.2
264.306	264.312	2010-09-22 07:20:00	2010-09-22 07:30:00		-999		0.00052	125	0.377	0.138	0.258	0.1161	0.0978	0.11485	0.10975	0.0616	0.09455	0	0	0	0	2.2
264.312	264.319	2010-09-22 07:30:00	2010-09-22 07:39:59		-999		0.00217	127	0.375	0.136	0.253	0.1134	0.0876	0.1165	0.10695	0.0627	0.08915	0	0	0	0	1.9
264.319	264.326	2010-09-22 07:39:59	2010-09-22 07:50:00		-999		-0.0029	127	0.361	0.135	0.248	0.1184	0.07655	0.10895	0.0994	0.06465	0.07755	0	0	0	0	1.5
264.326	264.333	2010-09-22 07:50:00	2010-09-22 07:59:59		-999		-0.00817	137	0.347	0.13	0.243	0.1212	0.07445	0.1027	0.0977	0.0646	0.07485	0	0	0	0	1.7
264.333	264.34	2010-09-22 07:59:59	2010-09-22 08:10:00		-999		-0.00027	139	0.334	0.124	0.24	0.12185	0.07525	0.1012	0.0976	0.06325	0.0713	0	0	0	0	1.9
264.34	264.347	2010-09-22 08:10:00	2010-09-22 08:19:59		-999		-0.0109	140	0.325	0.12	0.237	0.12215	0.0789	0.1009	0.09775	0.06185	0.0669	0	0	0	0	1.9
264.347	264.354	2010-09-22 08:19:59	2010-09-22 08:30:00		-999		-0.00078	137	0.319	0.12	0.234	0.1616	0.0831	0.1317	0.0971	0.0735	0.05995	0	0	0	0	1.6
264.354	264.361	2010-09-22 08:30:00	2010-09-22 08:39:59		-999		0.00383	137	0.308	0.117	0.231	0.17235	0.08545	0.1379	0.0947	0.0723	0.04985	0	0	0	0	1.3
264.361	264.368	2010-09-22 08:39:59	2010-09-22 08:50:00		-999		0.00718	152	0.296	0.113	0.227	0.17095	0.08505	0.13755	0.08865	0.07075	0.0447	0	0	0	0	1.4
264.368	264.375	2010-09-22 08:50:00	2010-09-22 09:00:00		-999		0.01025	145	0.277	0.109	0.22	0.1647	0.08245	0.13655	0.07785	0.06485	0.0419	0	0	0	0	1
264.375	264.382	2010-09-22 09:00:00	2010-09-22 09:09:59		-999		0.00316	167	0.255	0.104	0.213	0.1608	0.07895	0.1398	0.07205	0.06225	0.03965	0	0	0	0	1.1
264.382	264.389	2010-09-22 09:09:59	2010-09-22 09:20:00		-999		-0.0018	175	0.233	0.1	0.207	0.15835	0.07605	0.1438	0.0596	0.05805	0.0365	0	0	0	0	1
264.389	264.396	2010-09-22 09:20:00	2010-09-22 09:29:59		-999		-0.00171	155	0.209	0.099	0.199	0.15605	0.0753	0.1424	0.0545	0.0543	0.03735	0	0	0	0	0.8
264.396	264.403	2010-09-22 09:29:59	2010-09-22 09:40:00		-999		-0.0013	147	0.182	0.097	0.19	0.1521	0.0747	0.13465	0.04965	0.05005	0.04015	0	0	0	0	1.2
264.403	264.41	2010-09-22 09:40:00	2010-09-22 09:49:59		-999		-0.00092	168	0.177	0.095	0.181	0.1484	0.07585	0.13125	0.0482	0.0508	0.04205	0	0	0	0	1.5
264.41	264.417	2010-09-22 09:49:59	2010-09-22 10:00:00				-0.00447	217	0.172	0.094	0.167	0.14885	0.067	0.13335	0.04525	0.0509	0.0414	0	0	0	0	2.7
264.417	264.424	2010-09-22 10:00:00	2010-09-22 10:09:59				0.00473	212	0.168	0.093	0.156	0.15145	0.0628	0.1379	0.04405	0.0499	0.04185	0	0	0	0	2.5
264.424	264.431	2010-09-22 10:09:59	2010-09-22 10:20:00				-0.00562	215	0.163	0.092	0.141	0.15595	0.05605	0.14555	0.04165	0.04945	0.04165	0	0	0	0	2.3
264.431	264.438	2010-09-22 10:20:00	2010-09-22 10:30:00				0.00185	211	0.159	0.092	0.128	0.11555	0.07955	0.14395	0.0335	0.0297	0.03815	0	0	0	0	3.2
264.438	264.444	2010-09-22 10:30:00	2010-09-22 10:39:59				-0.00387	207	0.155	0.091	0.114	0.10015	0.1076	0.1633	0.03	0.03115	0.03785	0	0	0	0	2.6
264.444	264.451	2010-09-22 10:39:59	2010-09-22 10:50:00				-0.0034	211	0.152	0.09	0.101	0.09655	0.1157	0.17135	0.03025	0.0346	0.042	0	0	0	0	2.3
264.451	264.458	2010-09-22 10:50:00	2010-09-22 10:59:59	NCE0.5			-0.00233	217	0.148	0.088	0.092	0.0983	0.1223	0.1811	0.0336	0.0399	0.0518	0	0	0	0	3.5
264.458	264.465	2010-09-22 10:59:59	2010-09-22 11:10:00	NCE0.5			0.00439	216	0.145	0.087	0.084	0.09955	0.123	0.18165	0.04115	0.0413	0.0629	0	0	0	0	3.4
264.465	264.472	2010-09-22 11:10:00	2010-09-22 11:19:59	NCE0.5			-0.00942	217	0.143	0.086	0.077	0.101	0.1224	0.1801	0.04965	0.04305	0.0726	0	0	0	0	3
264.472	264.479	2010-09-22 11:19:59	2010-09-22 11:30:00	NCE0.5			0.00509	201	0.14	0.085	0.07	0.10265	0.1217	0.1816	0.053	0.04515	0.07775	0	0	0	0	2.5
264.479	264.486	2010-09-22 11:30:00	2010-09-22 11:39:59	NCE0.5			0.00015	187	0.137	0.085	0.067	0.1011	0.1223	0.1818	0.0533	0.04525	0.0777	0	0	0	0	2.7
264.486	264.493	2010-09-22 11:39:59	2010-09-22 11:50:00	NCE0.5			-0.00315	195	0.132	0.081	0.067	0.1002	0.1228	0.18095	0.0533	0.0432	0.07765	0	0	0	0	2.5
264.493	264.5	2010-09-22 11:50:00	2010-09-22 12:00:00	NCE0.5			0.00317	194	0.126	0.079	0.065	0.0976	0.12395	0.1808	0.05275	0.0445	0.0782	0	0	0	0	3.3
264.5	264.507	2010-09-22 12:00:00	2010-09-22 12:09:59	NCE0.5			0.00096	191	0.118	0.079	0.059	0.0928	0.13715	0.1864	0.0538	0.0504	0.08495	0	0	0	0	3.3
264.507	264.514	2010-09-22 12:09:59	2010-09-22 12:20:00	NCE0.5			0.0016	195	0.108	0.079	0.05	0.0852	0.14385	0.1865	0.05605	0.0549	0.0896	0	0	0	0	2.3
264.514	264.521	2010-09-22 12:20:00	2010-09-22 12:29:59	NCE0.5			0.00059	182	0.098	0.077	0.044	0.08615	0.13975	0.1872	0.06095	0.0613	0.1024	0	0	0	0	2.5
264.521	264.528	2010-09-22 12:29:59	2010-09-22 12:40:00	NCE0.5			-0.00093	220	0.088	0.076	0.036	0.0765	0.13045	0.1667	0.06245	0.06165	0.10295	0	0	0	0	3.4
264.528	264.535	2010-09-22 12:40:00	2010-09-22 12:49:59	NCE0.5			0.0012	225	0.08	0.075	0.029	0.07425	0.1302	0.15825	0.06235	0.0608	0.1023	0	0	0	0	3.4
264.535	264.542	2010-09-22 12:49:59	2010-09-22 13:00:00	NCE0.5			-0.00392	248	0.074	0.075	0.026	0.07145	0.1264	0.1468	0.06165	0.0592	0.0976	0	0	0	0	3.5
264.542	264.549	2010-09-22 13:00:00	2010-09-22 13:09:59	NCE0.5			-0.00373	230	0.07	0.074	0.023	0.06895	0.12735	0.1431	0.0573	0.0583	0.09075	0	0	0	0	3.2
264.549	264.556	2010-09-22 13:09:59	2010-09-22 13:20:00	NCE0.5			-0.0042	221	0.068	0.073	0.023	0.0594	0.1268	0.1418	0.0497	0.05785	0.08435	0	0	0	0	3.8
264.556	264.562	2010-09-22 13:20:00	2010-09-22 13:30:00	NCE0.5			-0.007	220	0.069	0.072	0.026	0.05645	0.1273	0.1421	0.04475	0.06035	0.08135	0	0	0	0	3.1
264.562	264.569	2010-09-22 13:30:00	2010-09-22 13:39:59	NCE0.5			-0.00062	236	0.07	0.072	0.026	0.0617	0.1268	0.14435	0.0469	0.06325	0.0811	0	0	0	0	3
264.569	264.576	2010-09-22 13:39:59	2010-09-22 13:50:00	NCE0.5			-0.0026	218	0.071	0.072	0.027	0.07105	0.1455	0.1528	0.07	0.07345	0.0813	0	0	0	0	2.9
264.576	264.583	2010-09-22 13:50:00	2010-09-22 13:59:59	NCE0.5			0.00079	241	0.069	0.071	0.027	0.08075	0.15525	0.15905	0.0751	0.0733	0.08315	0	0	0	0	3.2
264.583	264.59	2010-09-22 13:59:59	2010-09-22 14:10:00	NCE0.5			-0.0006	222	0.071	0.071	0.028	0.08245	0.1508	0.15895	0.07835	0.0702	0.08255	0	0	0	0	3.6
264.59	264.597	2010-09-22 14:10:00	2010-09-22 14:19:59	NCE0.5			-0.00293	229	0.073	0.071	0.029	0.0869	0.1517	0.16835	0.08585	0.0667	0.08985	0	0	0	0	3.9
264.597	264.604	2010-09-22 14:19:59	2010-09-22 14:30:00	NCE0.5			-0.0012	227	0.079	0.07	0.033	0.0838	0.1466	0.15885	0.0845	0.06075	0.07925	0	0	0	0	3.3
264.604	264.611	2010-09-22 14:30:00	2010-09-22 14:39:59	NCE0.5			-0.00608	216	0.082	0.07	0.035	0.08655	0.14785	0.1577	0.08515	0.06025	0.0797	0	0	0	0	2.4
264.611	264.618	2010-09-22 14:39:59	2010-09-22 14:50:00	NCE0.5			-0.00908	190	0.087	0.07	0.04	0.08575	0.14425	0.1563	0.08775	0.0618	0.0795	0	0	0	0	2.6
264.618	264.625	2010-09-22 14:50:00	2010-09-22 15:00:00	NCE0.5			-0.00108	247	0.09	0.071	0.041	0.0852	0.14255	0.1557	0.08695	0.0608	0.07965	0	0	0	0	1.6
264.625	264.632	2010-09-22 15:00:00	2010-09-22 15:09:59	NCE0.5			0.00021	232	0.092	0.071	0.041	0.08395	0.1407	0.1553	0.0861	0.0639	0.0823	0	0	0	0	2.1
264.632	264.639	2010-09-22 15:09:59	2010-09-22 15:20:00	NCE0.5			-0.0027	217	0.094	0.071	0.042	0.083	0.14085	0.154	0.08555	0.07105	0.0864	0	0	0	0	2.8
264.639	264.646	2010-09-22 15:20:00	2010-09-22 15:29:59	NCE0.5			-0.00213	239	0.099	0.071	0.048	0.0861	0.14545	0.1542	0.0857	0.07335	0.0891	0	0	0	0	2.4
264.646	264.653	2010-09-22 15:29:59	2010-09-22 15:40:00	NCE0.5			0.00042	211	0.109	0.07	0.058	0.0904	0.1482	0.15235	0.08425	0.0793	0.09365	0	0	0	0	2.6
264.653	264.66	2010-09-22 15:40:00	2010-09-22 15:49:59	NCE0.5			0.00613	225	0.122	0.071	0.073	0.087	0.1286	0.1469	0.0673	0.07725	0.0968	0	0	0	0	2.9
264.66	264.667	2010-09-22 15:49:59	2010-09-22 16:00:00	NCE0.5			0.00256	227	0.137	0.07	0.088	0.0781	0.11775	0.1379	0.06185	0.0794	0.09765	0	0	0	0	2.7
264.667	264.674	2010-09-22 16:00:00	2010-09-22 16:09:59				-0.00458	216	0.155	0.069	0.108	0.0784	0.1102	0.1256	0.0569	0.08355	0.0951	0	0	0	0	2.3
264.674	264.681	2010-09-22 16:09:59	2010-09-22 16:20:00				-0.00123	224	0.172	0.067	0.127	0.0729	0.09905	0.0992	0.043	0.08825	0.08635	0	0	0	0	2.2
264.681	264.688	2010-09-22 16:20:00	2010-09-22 16:30:00				-0.00495	236	0.19	0.067	0.144	0.06935	0.0876	0.0719	0.03995	0.09095	0.08355	0	0	0	0	2.2
264.688	264.694	2010-09-22 16:30:00	2010-09-22 16:39:59		-999		-0.00946	-999	0.206	0.068	0.158	0.0669	0.07345	0.0624	0.03685	0.09235	0.0824	0	0	0	0	2.2
264.694	264.701	2010-09-22 16:39:59	2010-09-22 16:50:00		-999		-0.0044	235	0.22	0.069	0.171	0.06695	0.0696	0.05695	0.03725	0.09105	0.0825	0	0	0	0	2.3
264.701	264.708	2010-09-22 16:50:00	2010-09-22 16:59:59		-999		0.00566	308	0.233	0.068	0.183	0.0771	0.08155	0.05835	0.039	0.0918	0.08345	0	0	0	0	2.2
264.708	264.715	2010-09-22 16:59:59	2010-09-22 17:10:00		-999		-0.0023	-999	0.244	0.068	0.194	0.1149	0.1196	0.05805	0.04965	0.092	0.0817	0	0	0	0	2.2
264.715	264.722	2010-09-22 17:10:00	2010-09-22 17:19:59		-999		0.00415	-999	0.254	0.067	0.203	0.1449	0.1455	0.05865	0.0559	0.0862	0.07855	0	0	0	0	2.2
264.722	264.729	2010-09-22 17:19:59	2010-09-22 17:30:00		-999		-0.01579	-999	0.263	0.067	0.213	0.1622	0.17235	0.05825	0.05725	0.082	0.07215	0	0	0	0	2.2
264.729	264.736	2010-09-22 17:30:00	2010-09-22 17:39:59		-999		-0.00407	-999	0.274	0.068	0.221	0.17365	0.18515	0.06995	0.0603	0.0747	0.0663	0	0	0	0	2.2
264.736	264.743	2010-09-22 17:39:59	2010-09-22 17:50:00		-999		-0.00526	-999	0.284	0.069	0.23	0.1738	0.1872	0.0807	0.06035	0.06625	0.0606	0	0	0	0	2.2
264.743	264.75	2010-09-22 17:50:00	2010-09-22 18:00:00		-999		-0.00057	-999	0.294	0.07	0.238	0.1732	0.1901	0.08905	0.06155	0.06315	0.05625	0	0	0	0	2.2
264.75	264.757	2010-09-22 18:00:00	2010-09-22 18:09:59		-999		-0.00321	-999	0.302	0.071	0.245	0.17295	0.18895	0.0908	0.0622	0.0566	0.0523	0	0	0	0	2.2
264.757	264.764	2010-09-22 18:09:59	2010-09-22 18:20:00		-999		0.0033	351	0.31	0.07	0.252	0.17395	0.1889	0.0939	0.0637	0.04875	0.04955	0	0	0	0	2.7
264.764	264.771	2010-09-22 18:20:00	2010-09-22 18:29:59		-999		0.00779	225	0.316	0.07	0.257	0.1739	0.189	0.09575	0.0632	0.0442	0.0495	0	0	0	0	3.7
264.771	264.778	2010-09-22 18:29:59	2010-09-22 18:40:00		-999		-0.00634	229	0.322	0.07	0.263	0.17345	0.18835	0.09565	0.0628	0.04165	0.04925	0	0	0	0	3.2
264.778	264.785	2010-09-22 18:40:00	2010-09-22 18:49:59		-999		-0.00043	219	0.327	0.071	0.266	0.17385	0.1879	0.097	0.05915	0.0418	0.04855	0	0	0	0	2.1
264.785	264.792	2010-09-22 18:49:59	2010-09-22 19:00:00		-999		-0.0018	218	0.332	0.071	0.271	0.16945	0.1828	0.09805	0.05715	0.03915	0.04645	0	0	0	0	1.6
264.792	264.799	2010-09-22 19:00:00	2010-09-22 19:09:59		-999		0.0004	220	0.337	0.071	0.275	0.146	0.16045	0.0995	0.04985	0.03545	0.044	0	0	0	0	1.3
264.799	264.806	2010-09-22 19:09:59	2010-09-22 19:20:00		-999		-0.00176	202	0.342	0.071	0.279	0.1153	0.13825	0.09965	0.04335	0.0352	0.03725	0	0	0	0	1.3
264.806	264.812	2010-09-22 19:20:00	2010-09-22 19:30:00		-999		-0.0061	206	0.346	0.071	0.283	0.08525	0.0956	0.0965	0.04255	0.03535	0.0364	0	0	0	0	1.3
264.812	264.819	2010-09-22 19:30:00	2010-09-22 19:39:59		-999		-0.00209	209	0.35	0.071	0.287	0.0446	0.0625	0.08585	0.03755	0.03405	0.0339	0	0	0	0	1.7
264.819	264.826	2010-09-22 19:39:59	2010-09-22 19:50:00		-999		-0.0009	209	0.352	0.071	0.289	0.03785	0.05495	0.06995	0.0353	0.03375	0.0329	0	0	0	0	2.1
264.826	264.833	2010-09-22 19:50:00	2010-09-22 19:59:59		-999		-0.00159	209	0.353	0.07	0.291	0.0432	0.03735	0.05995	0.0354	0.033	0.0376	0	0	0	0	1.8
264.833	264.84	2010-09-22 19:59:59	2010-09-22 20:10:00		-999		-0.00524	209	0.352	0.07	0.291	0.051	0.0366	0.06465	0.0477	0.03405	0.0542	0	0	0	0	1.6
264.84	264.847	2010-09-22 20:10:00	2010-09-22 20:19:59		-999		-0.00088	213	0.351	0.07	0.29	0.0738	0.03895	0.0748	0.0708	0.0336	0.07545	0	0	0	0	1.7
264.847	264.854	2010-09-22 20:19:59	2010-09-22 20:30:00		-999		0.00067	212	0.35	0.07	0.288	0.0906	0.04015	0.0863	0.09025	0.0329	0.0936	0	0	0	0	1.8
264.854	264.861	2010-09-22 20:30:00	2010-09-22 20:39:59		-999		-0.0013	214	0.349	0.069	0.288	0.10545	0.0419	0.0997	0.0996	0.0333	0.1057	0	0	0	0	1.7
264.861	264.868	2010-09-22 20:39:59	2010-09-22 20:50:00		-999		-0.00127	209	0.348	0.069	0.288	0.1135	0.04355	0.104	0.1088	0.03225	0.11265	0	0	0	0	2
264.868	264.875	2010-09-22 20:50:00	2010-09-22 21:00:00		-999		-0.00013	207	0.348	0.07	0.287	0.1208	0.04575	0.1047	0.11505	0.03395	0.1155	0	0	0	0	2.2
264.875	264.882	2010-09-22 21:00:00	2010-09-22 21:09:59		-999		0.00013	201	0.349	0.072	0.286	0.1272	0.04905	0.10585	0.11675	0.0331	0.1163	0	0	0	0	2.4
264.882	264.889	2010-09-22 21:09:59	2010-09-22 21:20:00		-999		0.0004	203	0.349	0.073	0.285	0.1323	0.05055	0.1068	0.11935	0.0347	0.11725	0	0	0	0	2.4
264.889	264.896	2010-09-22 21:20:00	2010-09-22 21:29:59		-999		0.00708	203	0.348	0.073	0.284	0.13595	0.05215	0.1078	0.12065	0.0322	0.1181	0	0	0	0	2.4
264.896	264.903	2010-09-22 21:29:59	2010-09-22 21:40:00		-999		-0.00151	211	0.347	0.072	0.283	0.14025	0.05345	0.1104	0.1211	0.0325	0.11935	0	0	0	0	2.1
264.903	264.91	2010-09-22 21:40:00	2010-09-22 21:49:59		-999		-0.00105	211	0.346	0.071	0.283	0.14285	0.0559	0.11135	0.1214	0.03215	0.1197	0	0	0	0	2.3
264.91	264.917	2010-09-22 21:49:59	2010-09-22 22:00:00		-999		-0.00192	205	0.345	0.069	0.284	0.1441	0.0576	0.11125	0.1213	0.0316	0.1184	0	0	0	0	2.1
264.917	264.924	2010-09-22 22:00:00	2010-09-22 22:09:59		-999		0.00077	207	0.345	0.068	0.285	0.14415	0.06115	0.10715	0.1166	0.03085	0.11185	0	0	0	0	2.3
264.924	264.931	2010-09-22 22:09:59	2010-09-22 22:20:00		-999		-0.0022	204	0.345	0.068	0.285	0.13655	0.0617	0.09825	0.1027	0.0333	0.09875	0	0	0	0	2.7
264.931	264.938	2010-09-22 22:20:00	2010-09-22 22:30:00		-999		-0.00143	206	0.347	0.067	0.288	0.12975	0.06225	0.08715	0.0873	0.0322	0.0828	0	0	0	0	3.3
264.938	264.944	2010-09-22 22:30:00	2010-09-22 22:39:59		-999		0.0015	210	0.348	0.067	0.29	0.1216	0.0639	0.07255	0.07815	0.02995	0.0685	0	0	0	0	3.3
264.944	264.951	2010-09-22 22:39:59	2010-09-22 22:50:00		-999		-0.0001	212	0.351	0.066	0.293	0.1169	0.06525	0.0638	0.0663	0.0295	0.0566	0	0	0	0	3.5
264.951	264.958	2010-09-22 22:50:00	2010-09-22 22:59:59		-999		-0.00263	217	0.355	0.066	0.297	0.1135	0.06705	0.05925	0.0563	0.02745	0.05105	0	0	0	0	3.4
264.958	264.965	2010-09-22 22:59:59	2010-09-22 23:10:00		-999		-0.00275	214	0.358	0.067	0.299	0.11165	0.06785	0.05485	0.0539	0.0255	0.0517	0	0	0	0	3.2
264.965	264.972	2010-09-22 23:10:00	2010-09-22 23:19:59		-999		-0.00127	213	0.359	0.068	0.3	0.11055	0.0694	0.05135	0.04935	0.02255	0.05075	0	0	0	0	3.4
264.972	264.979	2010-09-22 23:19:59	2010-09-22 23:30:00		-999		-0.00145	219	0.359	0.07	0.299	0.1122	0.07025	0.0526	0.04645	0.0255	0.0492	0	0	0	0	3.1
264.979	264.986	2010-09-22 23:30:00	2010-09-22 23:39:59		-999		0.0052	225	0.36	0.071	0.298	0.1137	0.0696	0.0547	0.0477	0.02385	0.04705	0	0	0	0	3.6
264.986	264.993	2010-09-22 23:39:59	2010-09-22 23:50:00		-999		-0.0011	229	0.359	0.073	0.296	0.11575	0.06755	0.0648	0.04875	0.02445	0.04815	0	0	0	0	2.9
264.993	265	2010-09-22 23:50:00	2010-09-23		-999		-0.00172	229	0.359	0.074	0.296	0.1176	0.06625	0.0683	0.04715	0.02515	0.0483	0	0	0	0	3.3
265	265.007	2010-09-23	2010-09-23 00:09:59		-999		-0.00013	234	0.36	0.074	0.296	0.12015	0.06425	0.07205	0.04725	0.02645	0.05025	0	0	0	0	3.5
265.007	265.014	2010-09-23 00:09:59	2010-09-23 00:20:00		-999		0.0006	220	0.36	0.075	0.295	0.11795	0.06255	0.0731	0.04795	0.02565	0.04885	0	0	0	0	3.9
265.014	265.021	2010-09-23 00:20:00	2010-09-23 00:29:59		-999		0.00633	220	0.359	0.075	0.294	0.1142	0.0609	0.07175	0.0464	0.02755	0.0462	0	0	0	0	3.5
265.021	265.028	2010-09-23 00:29:59	2010-09-23 00:40:00		-999		0.00565	227	0.357	0.074	0.292	0.1111	0.0589	0.071	0.04325	0.0327	0.04545	0	0	0	0	3.7
265.028	265.035	2010-09-23 00:40:00	2010-09-23 00:49:59		-999		0	225	0.355	0.074	0.291	0.108	0.0561	0.07095	0.04165	0.0342	0.04385	0	0	0	0	3.8
265.035	265.042	2010-09-23 00:49:59	2010-09-23 01:00:00		-999		-0.00365	225	0.353	0.073	0.289	0.10365	0.0519	0.0715	0.0403	0.0363	0.0441	0	0	0	0	3.8
265.042	265.049	2010-09-23 01:00:00	2010-09-23 01:09:59		-999		-0.00575	228	0.348	0.071	0.286	0.09945	0.05355	0.07445	0.0368	0.0374	0.0433	0	0	0	0	3.6
265.049	265.056	2010-09-23 01:09:59	2010-09-23 01:20:00		-999		0.00221	235	0.347	0.07	0.286	0.0965	0.0509	0.07415	0.03495	0.0373	0.0428	0	0	0	0	3.4
265.056	265.062	2010-09-23 01:20:00	2010-09-23 01:30:00		-999		0.00615	231	0.347	0.069	0.286	0.09125	0.04865	0.07255	0.0346	0.0366	0.04275	0	0	0	0	3.8
265.062	265.069	2010-09-23 01:30:00	2010-09-23 01:39:59		-999		-0.02129	235	0.346	0.069	0.286	0.0844	0.04935	0.0666	0.033	0.0366	0.04305	0	0	0	0	3.8
265.069	265.076	2010-09-23 01:39:59	2010-09-23 01:50:00		-999		0.008	227	0.345	0.069	0.285	0.0794	0.0497	0.05655	0.03105	0.0369	0.0423	0	0	0	0	3.9
265.076	265.083	2010-09-23 01:50:00	2010-09-23 01:59:59		-999		-0.00271	215	0.345	0.069	0.285	0.07475	0.0505	0.0518	0.03235	0.03665	0.04185	0	0	0	0	3.8
265.083	265.09	2010-09-23 01:59:59	2010-09-23 02:10:00		-999		0.00038	231	0.345	0.069	0.285	0.06565	0.0521	0.0448	0.03275	0.03705	0.03905	0	0	0	0	4
265.09	265.097	2010-09-23 02:10:00	2010-09-23 02:19:59		-999		-0.00047	232	0.346	0.069	0.286	0.06315	0.0548	0.04035	0.0315	0.0372	0.04005	0	0	0	0	3.9
265.097	265.104	2010-09-23 02:19:59	2010-09-23 02:30:00		-999		0.00478	228	0.346	0.069	0.286	0.0686	0.0559	0.04395	0.03125	0.03635	0.041	0	0	0	0	3.7
265.104	265.111	2010-09-23 02:30:00	2010-09-23 02:39:59		-999		-0.00267	235	0.346	0.068	0.286	0.0707	0.0573	0.0464	0.031	0.03275	0.0384	0	0	0	0	3
265.111	265.118	2010-09-23 02:39:59	2010-09-23 02:50:00		-999		-0.0043	236	0.346	0.067	0.287	0.07635	0.0582	0.05	0.02915	0.0325	0.0397	0	0	0	0	3.1
265.118	265.125	2010-09-23 02:50:00	2010-09-23 03:00:00		-999		-0.00608	235	0.345	0.066	0.288	0.0796	0.05815	0.05075	0.0281	0.03135	0.03895	0	0	0	0	3.8
265.125	265.132	2010-09-23 03:00:00	2010-09-23 03:09:59		-999		0.00517	234	0.344	0.065	0.29	0.08285	0.0552	0.04615	0.0285	0.0311	0.03655	0	0	0	0	3.6
265.132	265.139	2010-09-23 03:09:59	2010-09-23 03:20:00		-999		-0.0016	233	0.343	0.063	0.292	0.0835	0.0534	0.04895	0.02835	0.03335	0.0379	0	0	0	0	4.3
265.139	265.146	2010-09-23 03:20:00	2010-09-23 03:29:59		-999		-0.00204	237	0.344	0.061	0.297	0.0863	0.053	0.0515	0.02705	0.0326	0.04015	0	0	0	0	4.4
265.146	265.153	2010-09-23 03:29:59	2010-09-23 03:40:00		-999		-0.00116	234	0.348	0.059	0.302	0.0876	0.05185	0.05395	0.0263	0.03245	0.03965	0	0	0	0	4.9
265.153	265.16	2010-09-23 03:40:00	2010-09-23 03:49:59		-999		0.003	236	0.351	0.057	0.306	0.08845	0.0511	0.05835	0.0273	0.03215	0.0394	0	0	0	0	4.8
265.16	265.167	2010-09-23 03:49:59	2010-09-23 04:00:00		-999		-0.00011	232	0.353	0.055	0.309	0.08965	0.0506	0.0593	0.02605	0.0319	0.03895	0	0	0	0	4.1
265.167	265.174	2010-09-23 04:00:00	2010-09-23 04:09:59		-999		-0.00658	234	0.353	0.055	0.31	0.0909	0.0494	0.05925	0.0262	0.0296	0.0381	0	0	0	0	4.3
265.174	265.181	2010-09-23 04:09:59	2010-09-23 04:20:00		-999		-0.00045	236	0.354	0.054	0.311	0.0924	0.0471	0.0603	0.02675	0.02745	0.0353	0	0	0	0	4.2
265.181	265.188	2010-09-23 04:20:00	2010-09-23 04:30:00		-999		0.0066	237	0.357	0.053	0.314	0.0926	0.0466	0.06	0.02635	0.02685	0.0348	0	0	0	0	4.1
265.188	265.194	2010-09-23 04:30:00	2010-09-23 04:39:59		-999		-0.00558	242	0.359	0.052	0.317	0.0997	0.05085	0.0606	0.02885	0.0264	0.0345	0	0	0	0	3.9
265.194	265.201	2010-09-23 04:39:59	2010-09-23 04:50:00		-999		-0.0057	246	0.362	0.052	0.32	0.10725	0.0589	0.06005	0.03035	0.02535	0.03475	0	0	0	0	4.2
265.201	265.208	2010-09-23 04:50:00	2010-09-23 04:59:59		-999		-0.00438	246	0.366	0.051	0.323	0.11615	0.0653	0.0626	0.03585	0.0253	0.0376	0	0	0	0	4.3
265.208	265.215	2010-09-23 04:59:59	2010-09-23 05:10:00		-999		9e-05	243	0.37	0.05	0.328	0.11915	0.0669	0.064	0.039	0.0253	0.03965	0	0	0	0	4.4
265.215	265.222	2010-09-23 05:10:00	2010-09-23 05:19:59		-999		0.00343	240	0.374	0.049	0.332	0.1245	0.0712	0.06415	0.04265	0.02355	0.04075	0	0	0	0	4.5
265.222	265.229	2010-09-23 05:19:59	2010-09-23 05:30:00		-999		-0.00403	242	0.376	0.049	0.334	0.1703	0.07425	0.1454	0.0438	0.0225	0.04025	0	0	0	0	4.7
265.229	265.236	2010-09-23 05:30:00	2010-09-23 05:39:59		-999		0.0015	240	0.38	0.049	0.337	0.1711	0.0775	0.1447	0.04395	0.023	0.0394	0	0	0	0	4.7
265.236	265.243	2010-09-23 05:39:59	2010-09-23 05:50:00		-999		-0.0076	239	0.383	0.048	0.341	0.17025	0.0797	0.14235	0.04345	0.0235	0.03795	0	0	0	0	4.6
265.243	265.25	2010-09-23 05:50:00	2010-09-23 06:00:00		-999		-0.003	242	0.387	0.047	0.345	0.16865	0.08115	0.1415	0.0451	0.0234	0.03815	0	0	0	0	4.2
265.25	265.257	2010-09-23 06:00:00	2010-09-23 06:09:59		-999		-0.00383	240	0.391	0.046	0.349	0.1676	0.08365	0.1416	0.04505	0.0272	0.038	0	0	0	0	4.5
265.257	265.264	2010-09-23 06:09:59	2010-09-23 06:20:00		-999		-0.0017	241	0.394	0.046	0.353	0.1668	0.08585	0.14115	0.04695	0.03015	0.0375	0	0	0	0	4.2
265.264	265.271	2010-09-23 06:20:00	2010-09-23 06:29:59		-999		-0.00063	245	0.398	0.045	0.357	0.16455	0.08535	0.14045	0.04765	0.03245	0.0372	0	0	0	0	3.8
265.271	265.278	2010-09-23 06:29:59	2010-09-23 06:40:00		-999		-0.005	233	0.402	0.046	0.36	0.15935	0.08155	0.1397	0.04725	0.03435	0.03685	0	0	0	0	3.6
265.278	265.285	2010-09-23 06:40:00	2010-09-23 06:49:59		-999		0.00513	236	0.404	0.046	0.362	0.1518	0.076	0.1385	0.0475	0.03625	0.0356	0	0	0	0	3.7
265.285	265.292	2010-09-23 06:49:59	2010-09-23 07:00:00		-999		-0.00099	227	0.405	0.046	0.363	0.1441	0.07075	0.1371	0.0443	0.03905	0.03475	0	0	0	0	3.4
265.292	265.299	2010-09-23 07:00:00	2010-09-23 07:09:59		-999		-0.00072	225	0.406	0.046	0.365	0.13925	0.06765	0.1372	0.0409	0.04355	0.03605	0	0	0	0	3.7
265.299	265.306	2010-09-23 07:09:59	2010-09-23 07:20:00		-999		-0.00443	228	0.406	0.046	0.366	0.13295	0.06355	0.13895	0.03715	0.04815	0.0408	0	0	0	0	3.8
265.306	265.312	2010-09-23 07:20:00	2010-09-23 07:30:00		-999		-0.00385	228	0.406	0.046	0.368	0.06255	0.06035	0.0556	0.03585	0.0522	0.0421	0	0	0	0	4
265.312	265.319	2010-09-23 07:30:00	2010-09-23 07:39:59		-999		-0.0055	234	0.403	0.046	0.364	0.05925	0.0562	0.0607	0.0344	0.0535	0.0427	0	0	0	0	3.4
265.319	265.326	2010-09-23 07:39:59	2010-09-23 07:50:00		-999		0.0035	229	0.396	0.046	0.358	0.05615	0.0539	0.06225	0.03395	0.05415	0.0441	0	0	0	0	3.3
265.326	265.333	2010-09-23 07:50:00	2010-09-23 07:59:59		-999		-0.00237	228	0.39	0.046	0.352	0.054	0.05145	0.06325	0.0314	0.05485	0.04385	0	0	0	0	3.3
265.333	265.34	2010-09-23 07:59:59	2010-09-23 08:10:00		-999		-0.00566	230	0.383	0.047	0.346	0.17155	0.04935	0.18485	0.0305	0.0584	0.04775	0	0	0	0	3.4
265.34	265.347	2010-09-23 08:10:00	2010-09-23 08:19:59		-999		-0.00233	228	0.377	0.048	0.339	0.2546	0.0442	0.265	0.02785	0.0573	0.048	0	0	0	0	3.4
265.347	265.354	2010-09-23 08:19:59	2010-09-23 08:30:00		-999		-0.0138	236	0.369	0.048	0.332	0.28975	0.04395	0.301	0.0297	0.05675	0.04775	0	0	0	0	3.3
265.354	265.361	2010-09-23 08:30:00	2010-09-23 08:39:59		-999		-0.006	230	0.363	0.049	0.326	0.3316	0.0461	0.34565	0.02945	0.05535	0.0484	0	0	0	0	3.6
265.361	265.368	2010-09-23 08:39:59	2010-09-23 08:50:00		-999		0.00072	235	0.355	0.05	0.318	0.34785	0.04835	0.36505	0.031	0.054	0.049	0	0	0	0	3.8
265.368	265.375	2010-09-23 08:50:00	2010-09-23 09:00:00		-999		-0.00088	222	0.347	0.051	0.31	0.3475	0.0483	0.3653	0.0311	0.05145	0.0473	0	0	0	0	4
265.375	265.382	2010-09-23 09:00:00	2010-09-23 09:09:59		-999		0.00075	225	0.34	0.051	0.303	0.3473	0.0463	0.36515	0.03105	0.0471	0.0449	0	0	0	0	4.4
265.382	265.389	2010-09-23 09:09:59	2010-09-23 09:20:00		-999		0.0015	222	0.33	0.052	0.294	0.34715	0.04445	0.36425	0.03135	0.0417	0.03755	0	0	0	0	5.5
265.389	265.396	2010-09-23 09:20:00	2010-09-23 09:29:59		-999		-0.00337	226	0.321	0.052	0.285	0.34715	0.0431	0.36315	0.03135	0.03675	0.0341	0	0	0	0	5.3
265.396	265.403	2010-09-23 09:29:59	2010-09-23 09:40:00		-999		-0.00275	216	0.311	0.052	0.276	0.34675	0.04275	0.3627	0.03145	0.03485	0.0329	0	0	0	0	5.8
265.403	265.41	2010-09-23 09:40:00	2010-09-23 09:49:59		-999		0.00315	224	0.299	0.053	0.264	0.3468	0.04135	0.36245	0.03155	0.03325	0.0307	0	0	0	0	6.1
265.41	265.417	2010-09-23 09:49:59	2010-09-23 10:00:00		-999		-0.00014	224	0.286	0.054	0.251	0.34675	0.0402	0.3623	0.0344	0.032	0.03395	0	0	0	0	6.1
265.417	265.424	2010-09-23 10:00:00	2010-09-23 10:09:59		-999		-0.00282	227	0.272	0.055	0.237	0.30255	0.03535	0.31515	0.03635	0.0203	0.03075	0	0	0	0	6.5
265.424	265.431	2010-09-23 10:09:59	2010-09-23 10:20:00		-999		-0.0013	227	0.257	0.056	0.222	0.24045	0.03965	0.2555	0.03575	0.02055	0.03145	0	0	0	0	6.7
265.431	265.438	2010-09-23 10:20:00	2010-09-23 10:30:00		-999		-0.00067	221	0.241	0.056	0.206	0.1961	0.04075	0.21235	0.03315	0.0201	0.0334	0	0	0	0	6.2
265.438	265.444	2010-09-23 10:30:00	2010-09-23 10:39:59		-999		-0.00304	217	0.223	0.057	0.189	0.10035	0.0413	0.12075	0.0332	0.0214	0.0336	0	0	0	0	6.7
265.444	265.451	2010-09-23 10:39:59	2010-09-23 10:50:00		-999		-0.0076	222	0.206	0.058	0.171	0.0462	0.03925	0.06675	0.03315	0.02095	0.03605	0	0	0	0	6.9
265.451	265.458	2010-09-23 10:50:00	2010-09-23 10:59:59				0.00417	221	0.188	0.059	0.153	0.0481	0.04095	0.0717	0.03495	0.02015	0.0408	0	0	0	0	7
265.458	265.465	2010-09-23 10:59:59	2010-09-23 11:10:00				-0.00161	222	0.167	0.06	0.132	0.0492	0.0455	0.07735	0.0373	0.0203	0.0429	0	0	0	0	6.6
265.465	265.472	2010-09-23 11:10:00	2010-09-23 11:19:59				0.00195	218	0.147	0.061	0.111	0.05345	0.05	0.0874	0.05665	0.0448	0.04355	0	0	0	0	6.6
265.472	265.479	2010-09-23 11:19:59	2010-09-23 11:30:00				0.00525	222	0.12	0.061	0.078	0.11735	0.05875	0.1527	0.05725	0.0459	0.04495	0	0	0	0	7
265.479	265.486	2010-09-23 11:30:00	2010-09-23 11:39:59				-0.00165	226	0.102	0.062	0.056	0.1762	0.0685	0.2099	0.05945	0.04675	0.04865	0	0	0	0	7.5
265.486	265.493	2010-09-23 11:39:59	2010-09-23 11:50:00				-0.00035	214	0.098	0.062	0.051	0.17665	0.071	0.21025	0.06065	0.0482	0.0491	0	0	0	0	7.8
265.493	265.5	2010-09-23 11:50:00	2010-09-23 12:00:00				0.00633	222	0.094	0.063	0.046	0.1768	0.0744	0.2108	0.05995	0.04925	0.0491	0	0	0	0	8.3
265.5	265.507	2010-09-23 12:00:00	2010-09-23 12:09:59				0	222	0.091	0.063	0.045	0.17715	0.07455	0.2107	0.05945	0.04985	0.0484	0	0	0	0	8.2
265.507	265.514	2010-09-23 12:09:59	2010-09-23 12:20:00				-0.0035	227	0.09	0.063	0.044	0.1775	0.07285	0.2106	0.06095	0.0502	0.0482	0	0	0	0	7.5
265.514	265.521	2010-09-23 12:20:00	2010-09-23 12:29:59				-0.00271	224	0.088	0.064	0.041	0.2019	0.0725	0.23145	0.06135	0.0503	0.04815	0	0	0	0	7.6
265.521	265.528	2010-09-23 12:29:59	2010-09-23 12:40:00				-0.0019	223	0.08	0.064	0.032	0.26465	0.07085	0.28945	0.06075	0.0509	0.04785	0	0	0	0	7.1
265.528	265.535	2010-09-23 12:40:00	2010-09-23 12:49:59				-0.00528	221	0.078	0.065	0.03	0.2637	0.0696	0.28765	0.0608	0.0521	0.04845	0	0	0	0	7
265.535	265.542	2010-09-23 12:49:59	2010-09-23 13:00:00			Tracer Exp. 2	-0.00275	219	0.075	0.065	0.027	0.2972	0.06865	0.3204	0.06305	0.05305	0.05375	0	0	0	0	6.3
265.542	265.549	2010-09-23 13:00:00	2010-09-23 13:09:59			Tracer Exp. 2	-0.01018	224	0.07	0.065	0.02	0.3221	0.06635	0.3431	0.0671	0.05465	0.05995	0	0	0	0	7.2
265.549	265.556	2010-09-23 13:09:59	2010-09-23 13:20:00			Tracer Exp. 2	-0.001	213	0.07	0.065	0.019	0.3256	0.0629	0.3456	0.05395	0.0397	0.0633	0	0	0	0	6.5
265.556	265.562	2010-09-23 13:20:00	2010-09-23 13:30:00			Tracer Exp. 2	0.00565	214	0.069	0.065	0.018	0.3069	0.05505	0.32315	0.05945	0.0377	0.0678	0	0	0	0	5.9
265.562	265.569	2010-09-23 13:30:00	2010-09-23 13:39:59			Tracer Exp. 2	-0.00404	218	0.066	0.066	0.014	0.28315	0.0424	0.2939	0.06005	0.0381	0.0689	0	0	0	0	6.3
265.569	265.576	2010-09-23 13:39:59	2010-09-23 13:50:00			Tracer Exp. 2	-0.0033	219	0.069	0.066	0.017	0.283	0.03955	0.2944	0.0599	0.03835	0.07	0	0	0	0	7
265.576	265.583	2010-09-23 13:50:00	2010-09-23 13:59:59				-0.00029	220	0.07	0.066	0.018	0.28385	0.0357	0.2962	0.05965	0.0393	0.0694	0	0	0	0	6.8
265.583	265.59	2010-09-23 13:59:59	2010-09-23 14:10:00				-0.0009	206	0.071	0.066	0.018	0.2843	0.0358	0.2971	0.0586	0.04025	0.06985	0	0	0	0	6.2
265.59	265.597	2010-09-23 14:10:00	2010-09-23 14:19:59				-0.00182	208	0.072	0.067	0.018	0.2844	0.03525	0.29675	0.0576	0.044	0.07345	0	0	0	0	5.4
265.597	265.604	2010-09-23 14:19:59	2010-09-23 14:30:00				-0.00177	225	0.071	0.067	0.018	0.2659	0.0344	0.27855	0.0577	0.04495	0.073	0	0	0	0	6.2
265.604	265.611	2010-09-23 14:30:00	2010-09-23 14:39:59				-0.00152	220	0.073	0.067	0.019	0.2057	0.0338	0.21855	0.05865	0.0435	0.0736	0	0	0	0	6
265.611	265.618	2010-09-23 14:39:59	2010-09-23 14:50:00				0.0037	224	0.076	0.067	0.019	0.20545	0.03755	0.21975	0.0575	0.04275	0.0714	0	0	0	0	5.1
265.618	265.625	2010-09-23 14:50:00	2010-09-23 15:00:00				0.00265	220	0.076	0.067	0.019	0.183	0.03775	0.1935	0.054	0.0422	0.0653	0	0	0	0	5.1
265.625	265.632	2010-09-23 15:00:00	2010-09-23 15:09:59				-0.00708	228	0.077	0.067	0.018	0.1541	0.0394	0.1688	0.04885	0.0408	0.05865	0	0	0	0	4.7
265.632	265.639	2010-09-23 15:09:59	2010-09-23 15:20:00				-0.0055	217	0.079	0.067	0.018	0.17355	0.0405	0.18485	0.0472	0.0396	0.0562	0	0	0	0	5.3
265.639	265.646	2010-09-23 15:20:00	2010-09-23 15:29:59				-0.00029	216	0.082	0.067	0.023	0.1651	0.04475	0.17535	0.0414	0.03975	0.05065	0	0	0	0	4.7
265.646	265.653	2010-09-23 15:29:59	2010-09-23 15:40:00				-0.0028	217	0.084	0.068	0.024	0.1647	0.0485	0.17505	0.0387	0.03785	0.04625	0	0	0	0	5.2
265.653	265.66	2010-09-23 15:40:00	2010-09-23 15:49:59				0.0095	221	0.085	0.068	0.024	0.1643	0.0478	0.17375	0.0371	0.03545	0.04465	0	0	0	0	5.2
265.66	265.667	2010-09-23 15:49:59	2010-09-23 16:00:00				0.0045	219	0.089	0.067	0.032	0.163	0.0466	0.17055	0.03815	0.0331	0.04395	0	0	0	0	5.4
265.667	265.674	2010-09-23 16:00:00	2010-09-23 16:09:59				-0.00535	223	0.094	0.067	0.039	0.1618	0.0468	0.1692	0.03955	0.03175	0.0432	0	0	0	0	5.7
265.674	265.681	2010-09-23 16:09:59	2010-09-23 16:20:00				-0.00388	220	0.099	0.066	0.045	0.16135	0.04725	0.1696	0.0386	0.0254	0.0356	0	0	0	0	6.5
265.681	265.688	2010-09-23 16:20:00	2010-09-23 16:30:00				0.00555	211	0.108	0.065	0.058	0.1612	0.04715	0.1696	0.0389	0.0219	0.0353	0	0	0	0	5.5
265.688	265.694	2010-09-23 16:30:00	2010-09-23 16:39:59				-0.0035	223	0.13	0.065	0.086	0.16105	0.04785	0.1693	0.03785	0.02245	0.03325	0	0	0	0	5.1
265.694	265.701	2010-09-23 16:39:59	2010-09-23 16:50:00				0.0022	230	0.155	0.065	0.114	0.16085	0.04555	0.16695	0.0379	0.0236	0.03375	0	0	0	0	5.9
265.701	265.708	2010-09-23 16:50:00	2010-09-23 16:59:59				-0.00287	213	0.179	0.065	0.139	0.1166	0.0454	0.1262	0.0384	0.02415	0.03345	0	0	0	0	4.9
265.708	265.715	2010-09-23 16:59:59	2010-09-23 17:10:00		-999		0.0017	213	0.202	0.065	0.162	0.0988	0.04295	0.1036	0.03675	0.02335	0.0326	0	0	0	0	5.1
265.715	265.722	2010-09-23 17:10:00	2010-09-23 17:19:59		-999		-0.00485	209	0.221	0.066	0.18	0.02335	0.0424	0.039	0.0349	0.02215	0.02905	0	0	0	0	5.3
265.722	265.729	2010-09-23 17:19:59	2010-09-23 17:30:00		-999		0.0015	212	0.241	0.066	0.199	0.02265	0.04155	0.03915	0.032	0.0239	0.0269	0	0	0	0	5.8
265.729	265.736	2010-09-23 17:30:00	2010-09-23 17:39:59		-999		0.00295	216	0.257	0.066	0.214	0.0275	0.04745	0.04085	0.0318	0.02495	0.0257	0	0	0	0	5.9
265.736	265.743	2010-09-23 17:39:59	2010-09-23 17:50:00		-999		-0.00103	222	0.272	0.066	0.228	0.0481	0.0767	0.0463	0.03425	0.0266	0.026	0	0	0	0	5.8
265.743	265.75	2010-09-23 17:50:00	2010-09-23 18:00:00		-999		-0.00287	209	0.286	0.066	0.24	0.0634	0.10025	0.0507	0.0357	0.02665	0.027	0	0	0	0	5.1
265.75	265.757	2010-09-23 18:00:00	2010-09-23 18:09:59		-999		-0.00513	201	0.298	0.067	0.251	0.06425	0.1047	0.05845	0.03625	0.0259	0.02755	0	0	0	0	4.5
265.757	265.764	2010-09-23 18:09:59	2010-09-23 18:20:00		-999		-0.0013	206	0.31	0.067	0.262	0.06655	0.1078	0.07265	0.0362	0.0286	0.0291	0	0	0	0	4.3
265.764	265.771	2010-09-23 18:20:00	2010-09-23 18:29:59		-999		-0.00184	195	0.322	0.068	0.272	0.0724	0.10965	0.08805	0.03825	0.0315	0.0281	0	0	0	0	3.1
265.771	265.778	2010-09-23 18:29:59	2010-09-23 18:40:00		-999		-0.00147	205	0.334	0.069	0.282	0.07835	0.11025	0.0984	0.0396	0.0342	0.03105	0	0	0	0	4.3
265.778	265.785	2010-09-23 18:40:00	2010-09-23 18:49:59		-999		-0.0022	193	0.346	0.069	0.293	0.08225	0.11065	0.1063	0.03965	0.0358	0.03105	0	0	0	0	3.6
265.785	265.792	2010-09-23 18:49:59	2010-09-23 19:00:00		-999		-0.00045	195	0.356	0.07	0.302	0.0853	0.11125	0.113	0.041	0.0353	0.0313	0	0	0	0	4.2
265.792	265.799	2010-09-23 19:00:00	2010-09-23 19:09:59		-999		-0.005	216	0.365	0.071	0.309	0.0853	0.112	0.11485	0.04105	0.0358	0.03125	0	0	0	0	4.7
265.799	265.806	2010-09-23 19:09:59	2010-09-23 19:20:00		-999		-0.00328	205	0.374	0.072	0.316	0.08535	0.1121	0.11565	0.06555	0.03725	0.06465	0	0	0	0	4.1
265.806	265.812	2010-09-23 19:20:00	2010-09-23 19:30:00		-999		-0.00217	208	0.382	0.073	0.323	0.0855	0.1106	0.11465	0.0692	0.0377	0.06555	0	0	0	0	3.7
265.812	265.819	2010-09-23 19:30:00	2010-09-23 19:39:59		-999		-0.004	205	0.39	0.073	0.33	0.08445	0.1066	0.1136	0.0702	0.03885	0.06605	0	0	0	0	4.2
265.819	265.826	2010-09-23 19:39:59	2010-09-23 19:50:00		-999		-0.0023	198	0.396	0.074	0.335	0.0764	0.08755	0.11195	0.07045	0.03955	0.06565	0	0	0	0	4.4
265.826	265.833	2010-09-23 19:50:00	2010-09-23 19:59:59		-999		0.00479	202	0.4	0.075	0.338	0.06715	0.0589	0.1108	0.0698	0.0399	0.0645	0	0	0	0	4.1
265.833	265.84	2010-09-23 19:59:59	2010-09-23 20:10:00		-999		-0.00651	204	0.401	0.075	0.338	0.06805	0.04975	0.10715	0.06965	0.0399	0.06455	0	0	0	0	4.2
265.84	265.847	2010-09-23 20:10:00	2010-09-23 20:19:59		-999		0.00455	207	0.4	0.076	0.337	0.06715	0.0415	0.09895	0.0704	0.03755	0.0643	0	0	0	0	3.7
265.847	265.854	2010-09-23 20:19:59	2010-09-23 20:30:00		-999		-0.001	202	0.398	0.077	0.336	0.0623	0.03575	0.08655	0.06885	0.03585	0.0646	0	0	0	0	4
265.854	265.861	2010-09-23 20:30:00	2010-09-23 20:39:59		-999		0.00162	204	0.392	0.078	0.329	0.05475	0.0333	0.07455	0.069	0.03465	0.0632	0	0	0	0	3.7
265.861	265.868	2010-09-23 20:39:59	2010-09-23 20:50:00		-999		-0.00375	202	0.383	0.078	0.321	0.0484	0.03	0.06285	0.0688	0.03225	0.0632	0	0	0	0	4
265.868	265.875	2010-09-23 20:50:00	2010-09-23 21:00:00		-999		-0.00125	194	0.372	0.079	0.311	0.04445	0.0248	0.0508	0.06715	0.0315	0.06255	0	0	0	0	3.3
265.875	265.882	2010-09-23 21:00:00	2010-09-23 21:09:59		-999		-0.00296	210	0.361	0.08	0.3	0.1957	0.0208	0.1961	0.0672	0.0308	0.0628	0	0	0	0	3.7
265.882	265.889	2010-09-23 21:09:59	2010-09-23 21:20:00		-999		0.0009	202	0.349	0.08	0.289	0.25455	0.01855	0.25585	0.04365	0.0286	0.02695	0	0	0	0	4.3
265.889	265.896	2010-09-23 21:20:00	2010-09-23 21:29:59		-999		-0.005	207	0.336	0.08	0.277	0.25475	0.0175	0.256	0.04035	0.0282	0.0259	0	0	0	0	4.1
265.896	265.903	2010-09-23 21:29:59	2010-09-23 21:40:00		-999		0.0044	196	0.324	0.08	0.265	0.2546	0.0164	0.2561	0.04005	0.02685	0.02615	0	0	0	0	4.1
265.903	265.91	2010-09-23 21:40:00	2010-09-23 21:49:59		-999		-0.00295	202	0.311	0.079	0.253	0.254	0.018	0.2561	0.0384	0.0245	0.0274	0	0	0	0	4.7
265.91	265.917	2010-09-23 21:49:59	2010-09-23 22:00:00		-999		-0.00099	192	0.298	0.078	0.241	0.25335	0.01925	0.25555	0.03645	0.0238	0.0284	0	0	0	0	4.6
265.917	265.924	2010-09-23 22:00:00	2010-09-23 22:09:59				-0.00347	196	0.286	0.077	0.23	0.25285	0.0198	0.2553	0.0453	0.0273	0.0305	0	0	0	0	4.6
265.924	265.931	2010-09-23 22:09:59	2010-09-23 22:20:00				-0.00056	200	0.272	0.077	0.217	0.2523	0.02285	0.25485	0.04425	0.02785	0.03045	0	0	0	0	4.9
265.931	265.938	2010-09-23 22:20:00	2010-09-23 22:30:00				0.00295	206	0.258	0.076	0.205	0.25205	0.0233	0.25455	0.04645	0.0293	0.031	0	0	0	0	5.2
265.938	265.944	2010-09-23 22:30:00	2010-09-23 22:39:59				-0.00516	202	0.243	0.076	0.19	0.25225	0.0227	0.2546	0.05025	0.03285	0.03135	0	0	0	0	5.2
265.944	265.951	2010-09-23 22:39:59	2010-09-23 22:50:00				-0.0029	202	0.226	0.076	0.174	0.25235	0.0249	0.2549	0.05235	0.03585	0.03285	0	0	0	0	5.1
265.951	265.958	2010-09-23 22:50:00	2010-09-23 22:59:59				-0.00167	205	0.21	0.077	0.158	0.25225	0.02475	0.25465	0.05685	0.0369	0.0357	0	0	0	0	5.6
265.958	265.965	2010-09-23 22:59:59	2010-09-23 23:10:00				-0.00094	198	0.194	0.078	0.142	0.16185	0.02455	0.16565	0.0689	0.04235	0.03975	0	0	0	0	5.4
265.965	265.972	2010-09-23 23:10:00	2010-09-23 23:19:59				-0.00315	196	0.177	0.081	0.125	0.03515	0.02395	0.04215	0.07175	0.04365	0.0412	0	0	0	0	5.6
265.972	265.979	2010-09-23 23:19:59	2010-09-23 23:30:00				-0.00688	192	0.159	0.083	0.105	0.03675	0.0245	0.04405	0.072	0.0432	0.04125	0	0	0	0	5.4
265.979	265.986	2010-09-23 23:30:00	2010-09-23 23:39:59	NCE0.6			-0.0085	200	0.139	0.084	0.082	0.03725	0.0265	0.0453	0.07285	0.0438	0.04105	0	0	0	0	5.7
265.986	265.993	2010-09-23 23:39:59	2010-09-23 23:50:00	NCE0.6			-0.00535	192	0.121	0.085	0.057	0.03705	0.0262	0.04525	0.07315	0.0467	0.0403	0	0	0	0	6.3
265.993	266	2010-09-23 23:50:00	2010-09-24	NCE0.6			-0.00128	209	0.106	0.087	0.033	0.03795	0.0253	0.0457	0.0737	0.0467	0.03955	0	0	0	0	6
266	266.007	2010-09-24	2010-09-24 00:09:59	NCE0.6			-0.00592	205	0.1	0.088	0.016	0.0397	0.0271	0.04575	0.06855	0.04505	0.03715	0	0	0	0	5.9
266.007	266.014	2010-09-24 00:09:59	2010-09-24 00:20:00	NCE0.6			-0.0042	204	0.1	0.089	0.014	0.0401	0.0248	0.04435	0.06865	0.04515	0.0376	0	0	0	0	6
266.014	266.021	2010-09-24 00:20:00	2010-09-24 00:29:59	NCE0.6			-0.0055	212	0.1	0.091	0.012	0.0421	0.02535	0.04785	0.06755	0.04485	0.0369	0	0	0	0	5.5
266.021	266.028	2010-09-24 00:29:59	2010-09-24 00:40:00	NCE0.6			-0.00982	208	0.101	0.092	0.012	0.0432	0.0267	0.05025	0.0653	0.04425	0.0372	0	0	0	0	5.7
266.028	266.035	2010-09-24 00:40:00	2010-09-24 00:49:59	NCE0.6			-0.00562	207	0.101	0.094	0.011	0.0443	0.02525	0.0501	0.0635	0.0429	0.0358	0	0	0	0	5.8
266.035	266.042	2010-09-24 00:49:59	2010-09-24 01:00:00	NCE0.6			-0.01171	208	0.102	0.094	0.011	0.0434	0.0263	0.05155	0.0607	0.04325	0.03325	0	0	0	0	6.5
266.042	266.049	2010-09-24 01:00:00	2010-09-24 01:09:59	NCE0.6			-0.00347	207	0.103	0.094	0.012	0.04335	0.0273	0.0507	0.04815	0.04	0.02725	0	0	0	0	6.6
266.049	266.056	2010-09-24 01:09:59	2010-09-24 01:20:00	NCE0.6			0.00094	225	0.104	0.095	0.013	0.0433	0.02735	0.0505	0.0469	0.0397	0.02625	0	0	0	0	6.8
266.056	266.062	2010-09-24 01:20:00	2010-09-24 01:30:00	NCE0.6			-0.00103	219	0.105	0.095	0.015	0.0441	0.0273	0.0485	0.0479	0.04095	0.02635	0	0	0	0	6.7
266.062	266.069	2010-09-24 01:30:00	2010-09-24 01:39:59	NCE0.6			0.00338	213	0.106	0.095	0.017	0.04425	0.02545	0.0474	0.0472	0.04045	0.02645	0	0	0	0	6.7
266.069	266.076	2010-09-24 01:39:59	2010-09-24 01:50:00	NCE0.6			0.0086	208	0.108	0.095	0.022	0.04505	0.0247	0.04665	0.0492	0.0434	0.02695	0	0	0	0	6.9
266.076	266.083	2010-09-24 01:50:00	2010-09-24 01:59:59	NCE0.6			-0.00492	215	0.111	0.094	0.029	0.0452	0.0261	0.04915	0.05075	0.0445	0.0269	0	0	0	0	6.3
266.083	266.09	2010-09-24 01:59:59	2010-09-24 02:10:00	NCE0.6			-0.00203	211	0.113	0.094	0.034	0.04345	0.02455	0.04825	0.05195	0.04525	0.02645	0	0	0	0	7.5
266.09	266.097	2010-09-24 02:10:00	2010-09-24 02:19:59	NCE0.6			-0.00198	208	0.12	0.094	0.048	0.04305	0.0249	0.0481	0.0524	0.04475	0.02535	0	0	0	0	8.5
266.097	266.104	2010-09-24 02:19:59	2010-09-24 02:30:00	NCE0.6			-0.00346	223	0.127	0.093	0.059	0.04005	0.02905	0.0465	0.0519	0.04395	0.02515	0	0	0	0	8
266.104	266.111	2010-09-24 02:30:00	2010-09-24 02:39:59	NCE0.6			-0.0055	219	0.133	0.092	0.067	0.0382	0.0355	0.04585	0.05045	0.04105	0.02495	0	0	0	0	7.7
266.111	266.118	2010-09-24 02:39:59	2010-09-24 02:50:00	NCE0.6			0.00186	216	0.142	0.091	0.08	0.0361	0.04235	0.04825	0.0504	0.03995	0.02525	0	0	0	0	7.6
266.118	266.125	2010-09-24 02:50:00	2010-09-24 03:00:00				-0.00317	229	0.158	0.09	0.101	0.03675	0.0455	0.04815	0.05215	0.0394	0.0314	0	0	0	0	7.4
266.125	266.132	2010-09-24 03:00:00	2010-09-24 03:09:59				-0.00021	229	0.177	0.087	0.127	0.03495	0.0499	0.0486	0.0508	0.0392	0.0363	0	0	0	0	6.9
266.132	266.139	2010-09-24 03:09:59	2010-09-24 03:20:00				-0.0046	224	0.191	0.083	0.146	0.0324	0.0529	0.04715	0.04835	0.03965	0.0381	0	0	0	0	5.5
266.139	266.146	2010-09-24 03:20:00	2010-09-24 03:29:59		-999		-0.01312	228	0.203	0.08	0.161	0.028	0.05445	0.0462	0.04565	0.0382	0.0388	0	0	0	0	5.6
266.146	266.153	2010-09-24 03:29:59	2010-09-24 03:40:00		-999		-0.00847	232	0.214	0.078	0.173	0.0265	0.0551	0.04585	0.04415	0.03915	0.0386	0	0	0	0	5.6
266.153	266.16	2010-09-24 03:40:00	2010-09-24 03:49:59		-999		-0.0036	224	0.226	0.076	0.185	0.0262	0.0556	0.04645	0.0446	0.0336	0.0401	0	0	0	0	5.8
266.16	266.167	2010-09-24 03:49:59	2010-09-24 04:00:00		-999		-0.00251	231	0.244	0.072	0.205	0.0246	0.05625	0.04355	0.04375	0.03255	0.04075	0	0	0	0	5.2
266.167	266.174	2010-09-24 04:00:00	2010-09-24 04:09:59		-999		-0.00292	228	0.248	0.07	0.225	0.02665	0.05825	0.04565	0.04215	0.03245	0.0413	0	0	0	0	4.9
266.174	266.181	2010-09-24 04:09:59	2010-09-24 04:20:00		-999		0.00279	239	0.253	0.068	0.238	0.03245	0.06095	0.04575	0.0439	0.03425	0.04165	0	0	0	0	5.3
266.181	266.188	2010-09-24 04:20:00	2010-09-24 04:30:00		-999		-0.00325	228	0.257	0.066	0.249	0.0381	0.0619	0.04355	0.0463	0.0357	0.04255	0	0	0	0	5
266.188	266.194	2010-09-24 04:30:00	2010-09-24 04:39:59		-999		-0.00196	240	0.269	0.061	0.26	0.04105	0.0584	0.04235	0.04995	0.0367	0.04435	0	0	0	0	4.2
266.194	266.201	2010-09-24 04:39:59	2010-09-24 04:50:00		-999		-0.0009	242	0.279	0.058	0.267	0.04145	0.0539	0.0368	0.0509	0.03645	0.0441	0	0	0	0	3.3
266.201	266.208	2010-09-24 04:50:00	2010-09-24 04:59:59		-999		-0.00296	229	0.293	0.056	0.277	0.0409	0.05165	0.0343	0.0483	0.03645	0.03965	0	0	0	0	4.1
266.208	266.215	2010-09-24 04:59:59	2010-09-24 05:10:00		-999		-0.00048	244	0.311	0.053	0.292	0.0409	0.04755	0.03175	0.0484	0.03635	0.0379	0	0	0	0	4.5
266.215	266.222	2010-09-24 05:10:00	2010-09-24 05:19:59		-999		-0.00075	238	0.332	0.05	0.312	0.04305	0.04585	0.0303	0.0499	0.04015	0.03555	0	0	0	0	5
266.222	266.229	2010-09-24 05:19:59	2010-09-24 05:30:00		-999		-0.00221	239	0.35	0.048	0.327	0.04635	0.04645	0.03015	0.05245	0.0427	0.03555	0	0	0	0	4.9
266.229	266.236	2010-09-24 05:30:00	2010-09-24 05:39:59		-999		0.00172	233	0.369	0.047	0.344	0.04925	0.04825	0.03	0.053	0.0438	0.0362	0	0	0	0	4.3
266.236	266.243	2010-09-24 05:39:59	2010-09-24 05:50:00		-999		-0.0018	232	0.388	0.046	0.36	0.05025	0.0499	0.0295	0.051	0.0461	0.03625	0	0	0	0	4
266.243	266.25	2010-09-24 05:50:00	2010-09-24 06:00:00		-999		-0.0022	234	0.406	0.046	0.376	0.0502	0.05295	0.03725	0.0492	0.04925	0.0407	0	0	0	0	4
266.25	266.257	2010-09-24 06:00:00	2010-09-24 06:09:59		-999		-0.01462	242	0.421	0.045	0.39	0.0495	0.05315	0.03505	0.05065	0.053	0.04115	0	0	0	0	4.3
266.257	266.264	2010-09-24 06:09:59	2010-09-24 06:20:00		-999		-0.0091	223	0.437	0.044	0.406	0.0483	0.05245	0.03605	0.04865	0.05335	0.0414	0	0	0	0	3.8
266.264	266.271	2010-09-24 06:20:00	2010-09-24 06:29:59		-999		-0.00137	228	0.461	0.044	0.429	0.04675	0.04975	0.03685	0.04805	0.0545	0.0414	0	0	0	0	3.2
266.271	266.278	2010-09-24 06:29:59	2010-09-24 06:40:00		-999		-0.00181	211	0.469	0.042	0.437	0.04485	0.0494	0.03585	0.04605	0.0545	0.03935	0	0	0	0	3.1
266.278	266.285	2010-09-24 06:40:00	2010-09-24 06:49:59		-999		-0.00243	217	0.467	0.04	0.436	0.0473	0.04915	0.03715	0.04625	0.0552	0.03955	0	0	0	0	3.1
266.285	266.292	2010-09-24 06:49:59	2010-09-24 07:00:00		-999		0.00479	221	0.462	0.039	0.432	0.0512	0.0499	0.03815	0.04545	0.05515	0.0395	0	0	0	0	3.2
266.292	266.299	2010-09-24 07:00:00	2010-09-24 07:09:59		-999		-0.006	221	0.453	0.039	0.425	0.0515	0.05055	0.0392	0.0446	0.05425	0.0372	0	0	0	0	2.6
266.299	266.306	2010-09-24 07:09:59	2010-09-24 07:20:00		-999		-0.00188	221	0.446	0.04	0.419	0.05065	0.0502	0.03925	0.04305	0.05165	0.03715	0	0	0	0	3.1
266.306	266.312	2010-09-24 07:20:00	2010-09-24 07:30:00		-999		-0.00243	219	0.44	0.042	0.414	0.05315	0.05755	0.0404	0.04	0.05085	0.0349	0	0	0	0	3.6
266.312	266.319	2010-09-24 07:30:00	2010-09-24 07:39:59		-999		-0.00121	232	0.434	0.044	0.409	0.0682	0.0727	0.04155	0.03795	0.04945	0.03425	0	0	0	0	3.6
266.319	266.326	2010-09-24 07:39:59	2010-09-24 07:50:00		-999		-0.0017	225	0.427	0.045	0.403	0.07045	0.0732	0.05405	0.03585	0.0486	0.03625	0	0	0	0	3.1
266.326	266.333	2010-09-24 07:50:00	2010-09-24 07:59:59		-999		-0.00229	221	0.415	0.046	0.394	0.07345	0.0717	0.0593	0.03605	0.0491	0.03555	0	0	0	0	2.9
266.333	266.34	2010-09-24 07:59:59	2010-09-24 08:10:00		-999		-0.00382	229	0.406	0.048	0.382	0.0796	0.0704	0.0707	0.03735	0.0453	0.041	0	0	0	0	3.8
266.34	266.347	2010-09-24 08:10:00	2010-09-24 08:19:59		-999		-0.0024	222	0.397	0.052	0.374	0.1027	0.0697	0.1025	0.03875	0.0453	0.04405	0	0	0	0	3.4
266.347	266.354	2010-09-24 08:19:59	2010-09-24 08:30:00		-999		-0.00202	219	0.39	0.053	0.367	0.149	0.0705	0.15385	0.0372	0.04395	0.04605	0	0	0	0	3.8
266.354	266.361	2010-09-24 08:30:00	2010-09-24 08:39:59		-999		-0.00172	221	0.384	0.056	0.361	0.1675	0.0754	0.17215	0.0358	0.04425	0.04925	0	0	0	0	2.2
266.361	266.368	2010-09-24 08:39:59	2010-09-24 08:50:00		-999		-0.00279	227	0.378	0.059	0.355	0.17615	0.07605	0.18235	0.03705	0.0444	0.05365	0	0	0	0	3.1
266.368	266.375	2010-09-24 08:50:00	2010-09-24 09:00:00		-999		-0.0005	226	0.37	0.061	0.348	0.181	0.0795	0.18465	0.03925	0.0439	0.05445	0	0	0	0	4.6
266.375	266.382	2010-09-24 09:00:00	2010-09-24 09:09:59		-999		-0.00966	232	0.358	0.065	0.335	0.18065	0.08745	0.1884	0.0401	0.04335	0.05585	0	0	0	0	4.5
266.382	266.389	2010-09-24 09:09:59	2010-09-24 09:20:00		-999		-0.0067	230	0.341	0.068	0.318	0.1803	0.0934	0.1914	0.0407	0.04205	0.0575	0	0	0	0	4.4
266.389	266.396	2010-09-24 09:20:00	2010-09-24 09:29:59		-999		-0.00316	244	0.325	0.068	0.302	0.1788	0.08805	0.1916	0.04035	0.0413	0.05975	0	0	0	0	3.9
266.396	266.403	2010-09-24 09:29:59	2010-09-24 09:40:00		-999		-0.0015	219	0.307	0.069	0.283	0.17555	0.0762	0.19685	0.0433	0.04075	0.06185	0	0	0	0	3.9
266.403	266.41	2010-09-24 09:40:00	2010-09-24 09:49:59		-999		0.00412	224	0.285	0.069	0.261	0.17895	0.0769	0.20225	0.0441	0.0378	0.05985	0	0	0	0	3.9
266.41	266.417	2010-09-24 09:49:59	2010-09-24 10:00:00		-999		-0.00292	197	0.263	0.07	0.237	0.1797	0.07645	0.2002	0.04755	0.03275	0.05785	0	0	0	0	3.1
266.417	266.424	2010-09-24 10:00:00	2010-09-24 10:09:59		-999		-0.0048	224	0.24	0.071	0.213	0.1914	0.0758	0.20865	0.04585	0.0318	0.05335	0	0	0	0	3.8
266.424	266.431	2010-09-24 10:09:59	2010-09-24 10:20:00		-999		-0.00156	222	0.21	0.072	0.177	0.18845	0.07475	0.2011	0.04895	0.03275	0.0507	0	0	0	0	5
266.431	266.438	2010-09-24 10:20:00	2010-09-24 10:30:00				-0.0022	215	0.152	0.072	0.107	0.1704	0.07395	0.1855	0.05145	0.03055	0.05205	0	0	0	0	5.4
266.438	266.444	2010-09-24 10:30:00	2010-09-24 10:39:59	NCE0.7			-0.00387	197	0.122	0.072	0.061	0.1742	0.07005	0.1938	0.05385	0.0284	0.0539	0	0	0	0	5
266.444	266.451	2010-09-24 10:39:59	2010-09-24 10:50:00	NCE0.7			0.0043	203	0.118	0.073	0.053	0.1759	0.07015	0.19655	0.05505	0.02735	0.05365	0	0	0	0	3.1
266.451	266.458	2010-09-24 10:50:00	2010-09-24 10:59:59	NCE0.7			-0.00446	210	0.116	0.073	0.048	0.1704	0.0664	0.19585	0.05575	0.02675	0.055	0	0	0	0	4.2
266.458	266.465	2010-09-24 10:59:59	2010-09-24 11:10:00	NCE0.7			0.0026	215	0.116	0.074	0.047	0.17175	0.0546	0.19465	0.05635	0.02655	0.05565	0	0	0	0	5.3
266.465	266.472	2010-09-24 11:10:00	2010-09-24 11:19:59	NCE0.7			-0.00275	210	0.115	0.075	0.046	0.17625	0.0495	0.2007	0.0588	0.02745	0.061	0	0	0	0	5.4
266.472	266.479	2010-09-24 11:19:59	2010-09-24 11:30:00	NCE0.7			-0.00432	208	0.116	0.075	0.047	0.1774	0.05475	0.20535	0.05945	0.0268	0.0611	0	0	0	0	5.4
266.479	266.486	2010-09-24 11:30:00	2010-09-24 11:39:59	NCE0.7			-0.0006	219	0.116	0.073	0.048	0.1774	0.06085	0.20845	0.0596	0.02715	0.06115	0	0	0	0	5.3
266.486	266.493	2010-09-24 11:39:59	2010-09-24 11:50:00	NCE0.7			-0.00136	221	0.115	0.072	0.049	0.1757	0.066	0.2098	0.06025	0.0274	0.06135	0	0	0	0	5.7
266.493	266.5	2010-09-24 11:50:00	2010-09-24 12:00:00	NCE0.7			0.00102	214	0.115	0.071	0.05	0.1755	0.07365	0.21475	0.0577	0.02975	0.06095	0	0	0	0	6.2
266.5	266.507	2010-09-24 12:00:00	2010-09-24 12:09:59	NCE0.7			-0.00975	222	0.115	0.07	0.051	0.16385	0.0872	0.21615	0.05675	0.0298	0.06255	0	0	0	0	6.3
266.507	266.514	2010-09-24 12:09:59	2010-09-24 12:20:00	NCE0.7			-0.0066	219	0.114	0.068	0.051	0.1531	0.0957	0.21405	0.061	0.02965	0.0729	0	0	0	0	5.5
266.514	266.521	2010-09-24 12:20:00	2010-09-24 12:29:59	NCE0.7			0.00179	221	0.112	0.068	0.05	0.1486	0.09905	0.21635	0.06225	0.0326	0.07105	0	0	0	0	6
266.521	266.528	2010-09-24 12:29:59	2010-09-24 12:40:00	NCE0.7			-0.00123	226	0.107	0.065	0.047	0.1281	0.10265	0.20495	0.0624	0.0347	0.0691	0	0	0	0	6.3
266.528	266.535	2010-09-24 12:40:00	2010-09-24 12:49:59	NCE0.7			-0.00095	226	0.102	0.062	0.045	0.1279	0.11175	0.2159	0.0608	0.03685	0.06985	0	0	0	0	5.7
266.535	266.542	2010-09-24 12:49:59	2010-09-24 13:00:00	NCE0.7			-0.00604	228	0.098	0.059	0.045	0.12905	0.1195	0.22365	0.0591	0.0393	0.0703	0	0	0	0	7.1
266.542	266.549	2010-09-24 13:00:00	2010-09-24 13:09:59	NCE0.7			-0.00183	221	0.092	0.054	0.043	0.12995	0.1194	0.22405	0.0578	0.04015	0.06955	0	0	0	0	7.6
266.549	266.556	2010-09-24 13:09:59	2010-09-24 13:20:00	NCE0.7			-0.00641	223	0.089	0.051	0.044	0.1256	0.1184	0.21845	0.0581	0.0408	0.0655	0	0	0	0	7.8
266.556	266.562	2010-09-24 13:20:00	2010-09-24 13:30:00	NCE0.7			-0.0001	222	0.088	0.051	0.043	0.1237	0.11645	0.21405	0.0581	0.041	0.0652	0	0	0	0	7.8
266.562	266.569	2010-09-24 13:30:00	2010-09-24 13:39:59	NCE0.7			-0.00334	224	0.082	0.051	0.036	0.11985	0.1126	0.20605	0.05685	0.0419	0.06305	0	0	0	0	7.1
266.569	266.576	2010-09-24 13:39:59	2010-09-24 13:50:00	NCE0.7			-0.0024	227	0.081	0.052	0.035	0.11535	0.1091	0.19715	0.0558	0.042	0.0633	0	0	0	0	6.2
266.576	266.583	2010-09-24 13:50:00	2010-09-24 13:59:59	NCE0.7			-0.00321	214	0.078	0.052	0.034	0.1127	0.106	0.19165	0.05595	0.041	0.06345	0	0	0	0	6.4
266.583	266.59	2010-09-24 13:59:59	2010-09-24 14:10:00	NCE0.7			-0.00088	215	0.076	0.052	0.032	0.107	0.0954	0.1767	0.0558	0.04075	0.06215	0	0	0	0	6.3
266.59	266.597	2010-09-24 14:10:00	2010-09-24 14:19:59	NCE0.7			-0.0035	219	0.075	0.053	0.031	0.1044	0.0905	0.1698	0.0472	0.0399	0.0502	0	0	0	0	5.8
266.597	266.604	2010-09-24 14:19:59	2010-09-24 14:30:00	NCE0.7			-0.00175	211	0.075	0.054	0.031	0.084	0.08675	0.1466	0.0429	0.0383	0.0492	0	0	0	0	6.3
266.604	266.611	2010-09-24 14:30:00	2010-09-24 14:39:59	NCE0.7			-0.0024	209	0.074	0.055	0.031	0.0765	0.08165	0.13225	0.03925	0.03685	0.0468	0	0	0	0	6.3
266.611	266.618	2010-09-24 14:39:59	2010-09-24 14:50:00	NCE0.7			-0.00245	202	0.073	0.056	0.03	0.04735	0.0705	0.0915	0.0388	0.0358	0.04095	0	0	0	0	5.3
266.618	266.625	2010-09-24 14:50:00	2010-09-24 15:00:00	NCE0.7			-0.00118	213	0.072	0.057	0.03	0.0414	0.0567	0.06705	0.03875	0.034	0.03795	0	0	0	0	6
266.625	266.632	2010-09-24 15:00:00	2010-09-24 15:09:59	NCE0.7			-0.00196	218	0.07	0.057	0.03	0.03135	0.0575	0.0594	0.03945	0.03365	0.03635	0	0	0	0	5.9
266.632	266.639	2010-09-24 15:09:59	2010-09-24 15:20:00	NCE0.7			-0.0017	222	0.07	0.056	0.03	0.02675	0.059	0.06085	0.0338	0.03295	0.03275	0	0	0	0	5.5
266.639	266.646	2010-09-24 15:20:00	2010-09-24 15:29:59	NCE0.7			-0.00142	218	0.066	0.055	0.029	0.029	0.05905	0.0628	0.0317	0.03165	0.0293	0	0	0	0	6.4
266.646	266.653	2010-09-24 15:29:59	2010-09-24 15:40:00	NCE0.7			0.00081	227	0.064	0.055	0.027	0.03495	0.05965	0.06655	0.031	0.02905	0.0296	0	0	0	0	6
266.653	266.66	2010-09-24 15:40:00	2010-09-24 15:49:59	NCE0.7			0.0006	221	0.062	0.056	0.025	0.04065	0.05765	0.06765	0.0372	0.0321	0.02925	0	0	0	0	6.6
266.66	266.667	2010-09-24 15:49:59	2010-09-24 16:00:00	NCE0.7			-0.00156	222	0.061	0.057	0.023	0.0409	0.05395	0.0684	0.03765	0.03255	0.02865	0	0	0	0	6.2
266.667	266.674	2010-09-24 16:00:00	2010-09-24 16:09:59	NCE0.7			0.00115	231	0.058	0.056	0.02	0.03985	0.05925	0.07505	0.03835	0.0358	0.03575	0	0	0	0	5.4
266.674	266.681	2010-09-24 16:09:59	2010-09-24 16:20:00	NCE0.7			-0.00228	211	0.057	0.056	0.02	0.0401	0.0598	0.08075	0.03895	0.03475	0.03835	0	0	0	0	6.6
266.681	266.688	2010-09-24 16:20:00	2010-09-24 16:30:00	NCE0.7			0.00092	206	0.056	0.055	0.021	0.04235	0.0609	0.08525	0.0377	0.0355	0.0385	0	0	0	0	6.1
266.688	266.694	2010-09-24 16:30:00	2010-09-24 16:39:59	NCE0.7			-0.00287	214	0.054	0.056	0.02	0.0473	0.0627	0.09235	0.0367	0.03525	0.03815	0	0	0	0	6.1
266.694	266.701	2010-09-24 16:39:59	2010-09-24 16:50:00	NCE0.7			-0.0008	215	0.053	0.056	0.019	0.0549	0.0595	0.0987	0.0368	0.03335	0.03885	0	0	0	0	8.8
266.701	266.708	2010-09-24 16:50:00	2010-09-24 16:59:59	NCE0.7			-0.00387	225	0.052	0.056	0.02	0.06255	0.0591	0.1047	0.0386	0.03615	0.0391	0	0	0	0	8.3
266.708	266.715	2010-09-24 16:59:59	2010-09-24 17:10:00	NCE0.7			-0.00159	222	0.051	0.056	0.02	0.0644	0.05895	0.10385	0.04125	0.04145	0.0407	0	0	0	0	7.1
266.715	266.722	2010-09-24 17:10:00	2010-09-24 17:19:59	NCE0.7			-0.0016	222	0.047	0.057	0.016	0.0655	0.0551	0.09925	0.04405	0.042	0.04095	0	0	0	0	7.1
266.722	266.729	2010-09-24 17:19:59	2010-09-24 17:30:00	NCE0.7			-0.00114	231	0.045	0.056	0.016	0.0691	0.0543	0.0988	0.04385	0.04215	0.0415	0	0	0	0	7.5
266.729	266.736	2010-09-24 17:30:00	2010-09-24 17:39:59	NCE0.7			-0.007	225	0.044	0.056	0.016	0.0667	0.0533	0.0971	0.04275	0.0424	0.04075	0	0	0	0	7.2
266.736	266.743	2010-09-24 17:39:59	2010-09-24 17:50:00	NCE0.7			0.0002	226	0.043	0.055	0.016	0.06425	0.0526	0.09485	0.03735	0.0402	0.04005	0	0	0	0	6.7
266.743	266.75	2010-09-24 17:50:00	2010-09-24 18:00:00	NCE0.7			-0.00262	223	0.042	0.055	0.017	0.06395	0.0532	0.0942	0.03635	0.0395	0.03955	0	0	0	0	8.8
266.75	266.757	2010-09-24 18:00:00	2010-09-24 18:09:59	NCE0.7			0.00342	227	0.041	0.055	0.018	0.0642	0.04765	0.09055	0.03475	0.03695	0.0332	0	0	0	0	9.4
266.757	266.764	2010-09-24 18:09:59	2010-09-24 18:20:00	NCE0.7			0.0087	223	0.039	0.054	0.02	0.0646	0.04485	0.08845	0.03345	0.03695	0.02885	0	0	0	0	8.9
266.764	266.771	2010-09-24 18:20:00	2010-09-24 18:29:59	NCE0.7			-0.00063	227	0.038	0.053	0.02	0.06365	0.0446	0.0863	0.0346	0.0355	0.0294	0	0	0	0	8.3
266.771	266.778	2010-09-24 18:29:59	2010-09-24 18:40:00	NCE0.7			-0.00224	223	0.037	0.052	0.02	0.0622	0.04185	0.08075	0.0368	0.0354	0.0315	0	0	0	0	9.3
266.778	266.785	2010-09-24 18:40:00	2010-09-24 18:49:59	NCE0.7			-0.00103	229	0.036	0.05	0.02	0.05885	0.0454	0.08075	0.0365	0.03945	0.03355	0	0	0	0	8.3
266.785	266.792	2010-09-24 18:49:59	2010-09-24 19:00:00	NCE0.7			-0.00155	236	0.035	0.05	0.019	0.05215	0.0476	0.07725	0.0346	0.0396	0.0395	0	0	0	0	7.3
266.792	266.799	2010-09-24 19:00:00	2010-09-24 19:09:59	NCE0.7			0.00035	236	0.036	0.049	0.019	0.05045	0.0471	0.0794	0.0309	0.03655	0.03945	0	0	0	0	7.2
266.799	266.806	2010-09-24 19:09:59	2010-09-24 19:20:00	NCE0.7			0.0003	246	0.035	0.049	0.019	0.0485	0.04745	0.0796	0.02995	0.03745	0.0396	0	0	0	0	6.8
266.806	266.812	2010-09-24 19:20:00	2010-09-24 19:30:00	NCE0.7			-0.00198	236	0.033	0.048	0.019	0.0458	0.04715	0.08005	0.0321	0.03785	0.0406	0	0	0	0	7.7
266.812	266.819	2010-09-24 19:30:00	2010-09-24 19:39:59	NCE0.7			-0.00146	246	0.034	0.049	0.019	0.04495	0.04855	0.07985	0.03505	0.03985	0.04085	0	0	0	0	7.7
266.819	266.826	2010-09-24 19:39:59	2010-09-24 19:50:00	NCE0.7			0.0039	234	0.033	0.049	0.019	0.04435	0.054	0.08465	0.0865	0.08085	0.0418	0	0	0	0	7.3
266.826	266.833	2010-09-24 19:50:00	2010-09-24 19:59:59	NCE0.7			0.00096	235	0.033	0.048	0.019	0.0459	0.0574	0.0914	0.1537	0.1441	0.0425	0	0	0	0	6.8
266.833	266.84	2010-09-24 19:59:59	2010-09-24 20:10:00				0.00988	236	0.032	0.048	0.019	0.05075	0.0616	0.10165	0.2169	0.20525	0.04285	0	0	0	0	7.3
266.84	266.847	2010-09-24 20:10:00	2010-09-24 20:19:59				0.01188	233	0.032	0.047	0.019	0.0503	0.07095	0.1065	0.27105	0.25865	0.043	0	0	0	0	6.9
266.847	266.854	2010-09-24 20:19:59	2010-09-24 20:30:00				0.01885	234	0.032	0.047	0.019	0.05225	0.0786	0.1166	0.3039	0.2892	0.0434	0	0	0	0	6.3
266.854	266.861	2010-09-24 20:30:00	2010-09-24 20:39:59				0.02733	237	0.032	0.048	0.02	0.0518	0.0836	0.1229	0.34075	0.3211	0.0466	0	0	0	0	5.6
266.861	266.868	2010-09-24 20:39:59	2010-09-24 20:50:00				0.0932	231	0.032	0.048	0.02	0.05005	0.0827	0.11835	0.3571	0.33425	0.04705	0	0	0	0	6.4
[truncated: 4,332 more rows]

## Sheet: Full-Cloud-Events (FCEs)
			offline sampling times
FCE event	start CEST	stop CEST	start CEST	stop CEST	remarks
FCE1.1	2010-09-14 11:00:00	2010-09-15 01:50:00	2010-09-14 11:00:00	2010-09-15 02:00:00	slight precipitation from 11:00-12:15 and from 23:00-01:00
FCE1.2	2010-09-15 03:00:00	2010-09-15 06:20:00			slight precipitation throughout event
FCE2.1	2010-09-15 23:00:00	2010-09-16 02:00:00
FCE4.1	2010-09-16 13:10:00	2010-09-16 15:00:00			slight precipitation throughout event
FCE5.1	2010-09-16 21:40:00	2010-09-16 23:50:00
FCE7.1	2010-09-24 21:10:00	2010-09-25 00:50:00	2010-09-24 23:45:00	2010-09-25 01:45:00
FCE11.2	2010-10-01 20:50:00	2010-10-02 03:10:00	2010-10-01 22:30:00	2010-10-02 05:30:00
FCE11.3	2010-10-02 07:10:00	2010-10-03 00:30:00	2010-10-02 14:30:00	2010-10-02 20:00:00	slight precipitation from 08:00-09:40
FCE13.3	2010-10-06 06:50:00	2010-10-07 01:00:00	2010-10-06 12:15:00	2010-10-07 03:15:00	COD49 and COD217 grey towards end
FCE22.0	2010-10-19 01:50:00	2010-10-19 09:00:00			temperature SM < 0°C
FCE22.1	2010-10-19 21:10:00	2010-10-20 02:30:00	2010-10-19 21:30:00	2010-10-20 03:30:00
FCE24.0	2010-10-21 22:10:00	2010-10-22 10:00:00			temperature SM < 0°C
FCE26.1	2010-10-23 23:40:00	2010-10-24 07:20:00	2010-10-24 01:30:00	2010-10-24 08:45:00	slight precipitation from 00:30-3:00
FCE26.2	2010-10-24 08:40:00	2010-10-24 12:20:00	2010-10-24 09:15:00	2010-10-24 11:45:00	slight precipitation from 10:50-11:40

## Sheet: Non-Cloud-Events (NCEs)
NCE events				offline sampling times
SW event	start CEST	stop CEST	remarks	start CEST	stop CEST	remarks
NCE0.1	2010-09-15 12:10:00	2010-09-15 22:10:00	in between FCE1.1+1.2 and FCE2.1	2010-09-15 18:00:00	2010-09-15 23:30:00	cloud is forming from 22:50 on
NCE0.2	2010-09-16 02:50:00	2010-09-16 06:10:00	in between FCE2.1 and FCE4.1
NCE0.3	2010-09-19 11:20:00	2010-09-19 17:00:00
NCE0.4	2010-09-20 11:50:00	2010-09-20 16:20:00		2010-09-20 10:30:00	2010-09-20 20:30:00	former offline NCE0.2, offline event GL partly decoupled
NCE0.5	2010-09-22 10:50:00	2010-09-22 16:00:00
NCE0.6	2010-09-23 23:30:00	2010-09-24 02:50:00
NCE0.7	2010-09-24 10:30:00	2010-09-24 20:00:00	preceding FCE7.1
NCE0.8	2010-10-03 11:20:00	2010-10-03 14:40:00	following FCE11.2+3
NCE0.9	2010-10-21 12:40:00	2010-10-21 21:20:00	directly preceding FCE24.0	2010-10-21 14:20:00	2010-10-21 22:10:00	former offline NCE0.3
NCE0.10	2010-10-23 16:10:00	2010-10-23 22:40:00	directly preceding FCE26.1+2
NE_NCE events				offline sampling times
NE events	start CEST	stop CEST		start CEST	stop CEST	comment
NE_NCE0.1	2010-10-07 13:00:00	2010-10-07 18:50:00
NE_NCE0.2	2010-10-08 15:10:00	2010-10-08 18:30:00
NE_NCE0.3	2010-10-09 14:30:00	2010-10-10 09:30:00
NE_NCE0.4	2010-10-10 15:50:00	2010-10-11 03:30:00
NE_NCE0.5	2010-10-11 13:00:00	2010-10-12 04:40:00

## Sheet: Color legend
			Color code		Meaning
LWC	Liquid water content	>=0.03	blue		cloud
	(LWC @ Mt. Schmücke)	<0.03	grey		no cloud
dd(SM)	Wind direction	200-250°	green		south-west sector
	(dd @ Mt. Schmücke)	190-200°	light green		southern edge of wind sector
		250-260°	light green		northern edge of wind sector
		0-90°	orange		north-east sector
		Rest	grey		wind parallel to mountain ridge
ff(SM)	Wind speed	0-4 m/s	light green		low wind speeds
	(ff @ Mt. Schmücke)	4-8 m/s	green		moderate wind speeds
		>8 m/s	dark green		high wind speeds
COD Ozone	Coefficient of divergence	0.00-0.05	dark red		very good correlation of data
and	(COD, N49nm, N217nm and O3)	0.05-0.10	red		good correlation of data
COD N49nm		0.10-0.15	orange		reasonably good correlation
		0.15-0.20	yellow		poor correlation
		0.20-1.00	grey		very poor or no correlation of data
Additionally with COD N217	Coefficient of divergence (COD, N217nm)	0.4-1.0	turquois		poor correlation in accumulation mode (--> CCN activation likely happened)
	for GL/SM and SM/GE
RR	Precipitation (RR)	> 0	blue		precipitation occured
