# Supplementary material for: Comprehensive assessment of meteorological conditions and airflow connectivity during HCCT-2010
Source: Copernicus journal article supplement (doi:10.5194/acp-14-9105-2014), 2014-09-05
Supplement: Supplementary file 2 [file supplement-cover-letter.pdf › supplement-cover-letter.pdf]

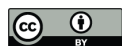

## *Supplement of*

# **Comprehensive assessment of meteorological conditions and airflow connectivity during HCCT-2010**

**A. Tilgner et al.**

*Correspondence to:* H. Herrmann ([herrmann@tropos.de](mailto:herrmann@tropos.de))

- Supplement-Cover-Letter.pdf
- ESM\_HCCTevents\_Mastertable\_final.xlsx
- ESM\_HCCTmeteo2014\_final.pdf
- \_\_MACOSX
  - .\_ESM\_HCCTevents\_Mastertable\_final.xlsx
  - .\_ESM\_HCCTmeteo2014\_final.pdf
